# Supplementary material for: Monte Carlo simulation for scanning technique with scattering foil free electron beam: A proof of concept study
Source: PLoS One. 2017 May 11;12(5):e0177380. doi: 10.1371/journal.pone.0177380 (PMC5426680; doi:10.1371/journal.pone.0177380)
Supplement: S1 Table — The benchmarking results of the simulated 6 MeV electron beam are shown. (XLSX) [file pone.0177380.s001.xlsx]

## Sheet: PDD
MC		BDM				Gamma passing rate (%)
Depth (cm)	Dose (%)	Depth (cm)	Dose (%)		1mm/2%	99.1597
0	73.6465	0	74.6		1.5mm/1.5%	95.7983
0.2	78.614	0.05	75.2		1mm/1%	89.916
0.4	82.6605	0.1	75.8
0.6	86.586	0.15	76.65
0.8	90.986	0.2	77.5
1	95.3488	0.25	78.55
1.1	98.4186	0.3	79.6
1.3	100	0.35	80.75
1.5	99.3488	0.4	81.9
1.7	94.7907	0.45	83.15
1.9	86.0651	0.5	84.4
2	77.4791	0.55	85.7
2.2	65.7674	0.6	87
2.4	47.9256	0.65	88.3
2.6	30.0372	0.7	89.6
2.9	12.0279	0.75	90.85
3.4	1.41581	0.8	92.1
3.9	0.696651	0.85	93.25
4.3	0.658791	0.9	94.4
4.7	0.644279	0.95	95.5
5.1	0.615163	1	96.6
5.5	0.607721	1.05	97.5
5.9	0.562512	1.1	98.4
		1.15	98.95
		1.2	99.5
		1.25	99.75
		1.3	100
		1.35	99.85
		1.4	99.7
		1.45	99.15
		1.5	98.6
		1.55	97.65
		1.6	96.7
		1.65	95.3
		1.7	93.9
		1.75	92.05
		1.8	90.2
		1.85	87.8
		1.9	85.4
		1.95	82.45
		2	79.5
		2.05	76.051
		2.1	72.601
		2.15	68.951
		2.2	65.301
		2.25	61.301
		2.3	57.301
		2.35	53.101
		2.4	48.901
		2.45	44.751
		2.5	40.601
		2.55	36.551
		2.6	32.501
		2.65	28.801
		2.7	25.101
		2.75	21.801
		2.8	18.501
		2.85	15.651
		2.9	12.801
		2.95	10.651
		3	8.501
		3.05	7.05
		3.1	5.601
		3.15	4.5
		3.2	3.4
		3.25	2.7
		3.3	2
		3.35	1.6
		3.4	1.2
		3.45	0.95
		3.5	0.7
		3.55	0.65
		3.6	0.6
		3.65	0.55
		3.7	0.5
		3.75	0.5
		3.8	0.5
		3.85	0.5
		3.9	0.5
		3.95	0.5
		4	0.5
		4.05	0.5
		4.1	0.5
		4.15	0.5
		4.2	0.5
		4.25	0.5
		4.3	0.5
		4.35	0.5
		4.4	0.5
		4.45	0.5
		4.5	0.5
		4.55	0.5
		4.6	0.5
		4.65	0.5
		4.7	0.5
		4.75	0.55
		4.8	0.6
		4.85	0.55
		4.9	0.5
		4.95	0.5
		5	0.5
		5.05	0.5
		5.1	0.5
		5.15	0.5
		5.2	0.5
		5.25	0.5
		5.3	0.5
		5.35	0.5
		5.4	0.5
		5.45	0.5
		5.5	0.5
		5.55	0.5
		5.6	0.5
		5.65	0.5
		5.7	0.5
		5.75	0.5
		5.8	0.5
		5.85	0.5
		5.9	0.5

## Sheet: 1
MC		BDM				Depth	1.3	cm	CR
Axis offset (cm)	Dose (%)	Axis offset (cm)	Dose (%)
-14	0.0284279	-15	0				Gamma passing rate (%)
-13.5	0.0355163	-14.9	0			2mm/3%	100
-13	0.0382791	-14.8	0			1.5mm/1.5%	98.8701
-12.5	0.0443349	-14.7	0			1mm/1%	97.1751
-12	0.0515349	-14.6	0
-11.5	0.0694419	-14.5	0
-11	0.0751721	-14.4	0
-10.5	0.110884	-14.3	0
-10	0.138512	-14.2	0
-9.5	0.168651	-14.1	0
-9	0.188651	-14	0
-8.5	0.245581	-13.9	0
-8	0.352558	-13.8	0
-7.5	0.550884	-13.7	0
-7	1.21581	-13.6	0
-6.5	3.33116	-13.5	0
-6	9.34884	-13.4	0
-5.5	26.3721	-13.3	0
-5	58.4279	-13.2	0
-4.5	84.7256	-13.1	0
-4	94.6047	-13	0
-3.5	97.6744	-12.9	0
-3	99.1628	-12.8	0
-2.5	99.7209	-12.7	0
-2	99.6279	-12.6	0
-1.5	99.7209	-12.5	0
-1	100.093	-12.4	0
-0.5	99.6279	-12.3	0
0	100	-12.2	0
0.5	99.814	-12.1	0
1	99.814	-12	0
1.5	99.907	-11.9	0
2	99.6279	-11.8	0
2.5	98.9767	-11.7	0
3	99.1628	-11.6	0
3.5	98.1395	-11.5	0
4	95.0698	-11.4	0
4.5	84.307	-11.3	0
5	57.9721	-11.2	0
5.5	26.1209	-11.1	0
6	9.35814	-11	0
6.5	3.33209	-10.9	0
7	1.17302	-10.8	0
7.5	0.533953	-10.7	0
8	0.343256	-10.6	0
8.5	0.256558	-10.5	0
9	0.203163	-10.4	0
9.5	0.188093	-10.3	0
10	0.158977	-10.2	0
10.5	0.114791	-10.1	0
11	0.0740744	-10	0
11.5	0.061386	-9.9	0
12	0.0506698	-9.8	0
12.5	0.0514047	-9.7	0
13	0.041107	-9.6	0
13.5	0.0339907	-9.5	0
14	0.0264558	-9.4	0
		-9.3	0
		-9.2	0
		-9.1	0
		-9	0
		-8.9	0
		-8.8	0
		-8.7	0
		-8.6	0
		-8.5	0
		-8.4	0
		-8.3	0
		-8.2	0
		-8.1	0.001
		-8	0.505
		-7.9	0.405
		-7.8	0.607
		-7.7	0.608
		-7.6	0.809
		-7.5	0.809
		-7.4	0.91
		-7.3	0.911
		-7.2	1.113
		-7.1	1.315
		-7	1.417
		-6.9	1.922
		-6.8	2.226
		-6.7	2.63
		-6.6	3.136
		-6.5	3.541
		-6.4	4.25
		-6.3	5.16
		-6.2	6.273
		-6.1	7.487
		-6	9.107
		-5.9	11.03
		-5.8	13.862
		-5.7	16.899
		-5.6	21.047
		-5.5	26.004
		-5.4	31.668
		-5.3	38.141
		-5.2	45.122
		-5.1	53.405
		-5	59.474
		-4.9	66.046
		-4.8	72.412
		-4.7	77.464
		-4.6	81.406
		-4.5	84.942
		-4.4	87.671
		-4.3	89.994
		-4.2	91.51
		-4.1	92.825
		-4	93.936
		-3.9	94.743
		-3.8	95.25
		-3.7	96.159
		-3.6	96.665
		-3.5	96.968
		-3.4	97.372
		-3.3	97.675
		-3.2	97.878
		-3.1	98.281
		-3	98.484
		-2.9	98.585
		-2.8	98.787
		-2.7	98.787
		-2.6	98.888
		-2.5	99.09
		-2.4	99.09
		-2.3	99.292
		-2.2	99.191
		-2.1	99.394
		-2	99.596
		-1.9	99.596
		-1.8	99.596
		-1.7	99.596
		-1.6	99.697
		-1.5	99.798
		-1.4	99.899
		-1.3	99.697
		-1.2	99.697
		-1.1	99.798
		-1	99.899
		-0.9	99.798
		-0.8	99.899
		-0.7	100
		-0.6	99.899
		-0.5	99.899
		-0.4	99.899
		-0.3	100
		-0.2	99.899
		-0.1	100
		0	100
		0.1	100
		0.2	99.899
		0.3	100
		0.4	99.899
		0.5	99.899
		0.6	99.899
		0.7	100
		0.8	99.899
		0.9	99.798
		1	99.899
		1.1	99.798
		1.2	99.697
		1.3	99.697
		1.4	99.899
		1.5	99.798
		1.6	99.697
		1.7	99.596
		1.8	99.596
		1.9	99.596
		2	99.595
		2.1	99.393
		2.2	99.191
		2.3	99.292
		2.4	99.09
		2.5	99.09
		2.6	98.888
		2.7	98.787
		2.8	98.787
		2.9	98.584
		3	98.483
		3.1	98.28
		3.2	97.876
		3.3	97.673
		3.4	97.37
		3.5	96.966
		3.6	96.662
		3.7	96.155
		3.8	95.246
		3.9	94.74
		4	93.931
		4.1	92.817
		4.2	91.503
		4.3	89.984
		4.4	87.657
		4.5	84.925
		4.6	81.386
		4.7	77.439
		4.8	72.38
		4.9	66.01
		5	59.439
		5.1	53.367
		5.2	45.079
		5.3	38.103
		5.4	31.635
		5.5	25.974
		5.6	21.022
		5.7	16.879
		5.8	13.846
		5.9	11.017
		6	9.096
		6.1	7.479
		6.2	6.266
		6.3	5.154
		6.4	4.245
		6.5	3.538
		6.6	3.133
		6.7	2.628
		6.8	2.223
		6.9	1.92
		7	1.415
		7.1	1.314
		7.2	1.112
		7.3	0.91
		7.4	0.91
		7.5	0.809
		7.6	0.809
		7.7	0.607
		7.8	0.607
		7.9	0.404
		8	0
		8.1	0
		8.2	0
		8.3	0
		8.4	0
		8.5	0
		8.6	0
		8.7	0
		8.8	0
		8.9	0
		9	0
		9.1	0
		9.2	0
		9.3	0
		9.4	0
		9.5	0
		9.6	0
		9.7	0
		9.8	0
		9.9	0
		10	0
		10.1	0
		10.2	0
		10.3	0
		10.4	0
		10.5	0
		10.6	0
		10.7	0
		10.8	0
		10.9	0
		11	0
		11.1	0
		11.2	0
		11.3	0
		11.4	0
		11.5	0
		11.6	0
		11.7	0
		11.8	0
		11.9	0
		12	0
		12.1	0
		12.2	0
		12.3	0
		12.4	0
		12.5	0
		12.6	0
		12.7	0
		12.8	0
		12.9	0
		13	0
		13.1	0
		13.2	0
		13.3	0
		13.4	0
		13.5	0
		13.6	0
		13.7	0
		13.8	0
		13.9	0
		14	0
		14.1	0
		14.2	0
		14.3	0
		14.4	0
		14.5	0
		14.6	0
		14.7	0
		14.8	0
		14.9	0

## Sheet: 2
MC		BDM				Depth	1.7	cm	CR
Axis offset (cm)	Dose (%)	Axis offset (cm)	Dose (%)
-14	0.0249558	-15	0				Gamma passing rate (%)
-13.5	0.0324436	-14.9	0			2mm/3%	100
-13	0.0347792	-14.8	0			1.5mm/1.5%	96.6102
-12.5	0.0410108	-14.7	0			1mm/1%	92.6554
-12	0.0474779	-14.6	0
-11.5	0.0546516	-14.5	0
-11	0.0644946	-14.4	0
-10.5	0.101668	-14.3	0
-10	0.132287	-14.2	0
-9.5	0.137586	-14.1	0
-9	0.167125	-14	0
-8.5	0.211678	-13.9	0
-8	0.294504	-13.8	0
-7.5	0.47262	-13.7	0
-7	1.25319	-13.6	0
-6.5	4.12758	-13.5	0
-6	12.2964	-13.4	0
-5.5	30.265	-13.3	0
-5	57.3209	-13.2	0
-4.5	81.0893	-13.1	0
-4	93.0324	-13	0
-3.5	97.7134	-12.9	0
-3	99.7056	-12.8	0
-2.5	100.098	-12.7	0
-2	100	-12.6	0
-1.5	100.196	-12.5	0
-1	100.196	-12.4	0
-0.5	100	-12.3	0
0	100	-12.2	0
0.5	100.491	-12.1	0
1	99.9019	-12	0
1.5	99.9019	-11.9	0
2	99.8037	-11.8	0
2.5	99.6075	-11.7	0
3	99.3131	-11.6	0
3.5	97.9097	-11.5	0
4	93.1796	-11.4	0
4.5	80.8243	-11.3	0
5	57.5368	-11.2	0
5.5	30.2944	-11.1	0
6	12.2866	-11	0
6.5	4.14033	-10.9	0
7	1.15898	-10.8	0
7.5	0.455348	-10.7	0
8	0.262807	-10.6	0
8.5	0.215407	-10.5	0
9	0.164868	-10.4	0
9.5	0.142493	-10.3	0
10	0.132188	-10.2	0
10.5	0.0988224	-10.1	0
11	0.0623454	-10	0
11.5	0.0506575	-9.9	0
12	0.0436899	-9.8	0
12.5	0.0408734	-9.7	0
13	0.0340137	-9.6	0
13.5	0.0292345	-9.5	0
14	0.0248773	-9.4	0
		-9.3	0
		-9.2	0
		-9.1	0
		-9	0
		-8.9	0
		-8.8	0
		-8.7	0
		-8.6	0
		-8.5	0
		-8.4	0
		-8.3	0
		-8.2	0
		-8.1	0.001
		-8	0.308
		-7.9	0.41
		-7.8	0.41
		-7.7	0.411
		-7.6	0.513
		-7.5	0.616
		-7.4	0.821
		-7.3	0.923
		-7.2	0.924
		-7.1	1.437
		-7	1.744
		-6.9	1.849
		-6.8	2.464
		-6.7	3.079
		-6.6	3.798
		-6.5	4.721
		-6.4	5.749
		-6.3	7.185
		-6.2	8.724
		-6.1	10.572
		-6	13.136
		-5.9	15.702
		-5.8	18.679
		-5.7	22.577
		-5.6	26.681
		-5.5	31.4
		-5.4	36.53
		-5.3	42.068
		-5.2	47.71
		-5.1	53.453
		-5	58.992
		-4.9	64.835
		-4.8	69.654
		-4.7	74.063
		-4.6	77.96
		-4.5	81.855
		-4.4	84.827
		-4.3	87.186
		-4.2	89.237
		-4.1	91.286
		-4	92.517
		-3.9	93.85
		-3.8	94.977
		-3.7	95.695
		-3.6	96.412
		-3.5	96.925
		-3.4	97.539
		-3.3	97.745
		-3.2	98.257
		-3.1	98.359
		-3	98.564
		-2.9	98.769
		-2.8	98.975
		-2.7	99.077
		-2.6	99.18
		-2.5	99.385
		-2.4	99.385
		-2.3	99.385
		-2.2	99.59
		-2.1	99.59
		-2	99.795
		-1.9	99.795
		-1.8	99.795
		-1.7	99.795
		-1.6	99.897
		-1.5	99.898
		-1.4	100
		-1.3	99.898
		-1.2	100
		-1.1	99.898
		-1	100.103
		-0.9	100.103
		-0.8	100.102
		-0.7	100
		-0.6	100.103
		-0.5	100.205
		-0.4	100.103
		-0.3	100.103
		-0.2	100.102
		-0.1	100
		0	100
		0.1	100
		0.2	100.103
		0.3	100.103
		0.4	100.103
		0.5	100.205
		0.6	100.102
		0.7	100
		0.8	100.103
		0.9	100.103
		1	100.102
		1.1	99.898
		1.2	100
		1.3	99.898
		1.4	100
		1.5	99.897
		1.6	99.897
		1.7	99.795
		1.8	99.795
		1.9	99.795
		2	99.795
		2.1	99.59
		2.2	99.59
		2.3	99.385
		2.4	99.385
		2.5	99.384
		2.6	99.179
		2.7	99.077
		2.8	98.974
		2.9	98.769
		3	98.564
		3.1	98.359
		3.2	98.255
		3.3	97.743
		3.4	97.537
		3.5	96.922
		3.6	96.409
		3.7	95.691
		3.8	94.971
		3.9	93.842
		4	92.51
		4.1	91.277
		4.2	89.225
		4.3	87.173
		4.4	84.813
		4.5	81.837
		4.6	77.939
		4.7	74.04
		4.8	69.629
		4.9	64.806
		5	58.961
		5.1	53.421
		5.2	47.679
		5.3	42.038
		5.4	36.501
		5.5	31.373
		5.6	26.657
		5.7	22.555
		5.8	18.66
		5.9	15.686
		6	13.122
		6.1	10.56
		6.2	8.714
		6.3	7.176
		6.4	5.741
		6.5	4.715
		6.6	3.793
		6.7	3.076
		6.8	2.46
		6.9	1.846
		7	1.742
		7.1	1.435
		7.2	0.923
		7.3	0.923
		7.4	0.82
		7.5	0.615
		7.6	0.513
		7.7	0.41
		7.8	0.41
		7.9	0.409
		8	0
		8.1	0
		8.2	0
		8.3	0
		8.4	0
		8.5	0
		8.6	0
		8.7	0
		8.8	0
		8.9	0
		9	0
		9.1	0
		9.2	0
		9.3	0
		9.4	0
		9.5	0
		9.6	0
		9.7	0
		9.8	0
		9.9	0
		10	0
		10.1	0
		10.2	0
		10.3	0
		10.4	0
		10.5	0
		10.6	0
		10.7	0
		10.8	0
		10.9	0
		11	0
		11.1	0
		11.2	0
		11.3	0
		11.4	0
		11.5	0
		11.6	0
		11.7	0
		11.8	0
		11.9	0
		12	0
		12.1	0
		12.2	0
		12.3	0
		12.4	0
		12.5	0
		12.6	0
		12.7	0
		12.8	0
		12.9	0
		13	0
		13.1	0
		13.2	0
		13.3	0
		13.4	0
		13.5	0
		13.6	0
		13.7	0
		13.8	0
		13.9	0
		14	0
		14.1	0
		14.2	0
		14.3	0
		14.4	0
		14.5	0
		14.6	0
		14.7	0
		14.8	0
		14.9	0

## Sheet: 3
MC		BDM				Depth	1.9	cm	CR
Axis offset (cm)	Dose (%)	Axis offset (cm)	Dose (%)
-14	0.0276805	-15	0				Gamma passing rate (%)
-13.5	0.037192	-14.9	0			2mm/3%	100
-13	0.0373757	-14.8	0			1.5mm/1.5%	98.8701
-12.5	0.05107	-14.7	0			1mm/1%	93.7853
-12	0.0451146	-14.6	0
-11.5	0.0548206	-14.5	0
-11	0.0697363	-14.4	0
-10.5	0.10949	-14.3	0
-10	0.137808	-14.2	0
-9.5	0.15013	-14.1	0
-9	0.165045	-14	0
-8.5	0.197147	-13.9	0
-8	0.26578	-13.8	0
-7.5	0.439364	-13.7	0
-7	1.15543	-13.6	0
-6.5	4.12992	-13.5	0
-6	13.0026	-13.4	0
-5.5	31.0311	-13.3	0
-5	57.1984	-13.2	0
-4.5	79.4747	-13.1	0
-4	92.9421	-13	0
-3.5	97.7951	-12.9	0
-3	99.3191	-12.8	0
-2.5	100.324	-12.7	0
-2	99.9892	-12.6	0
-1.5	99.7838	-12.5	0
-1	100.27	-12.4	0
-0.5	100.032	-12.3	0
0	100	-12.2	0
0.5	100.432	-12.1	0
1	99.9568	-12	0
1.5	99.7838	-11.9	0
2	99.4704	-11.8	0
2.5	99.9027	-11.7	0
3	99.438	-11.6	0
3.5	97.46	-11.5	0
4	92.5205	-11.4	0
4.5	79.7341	-11.3	0
5	57.1768	-11.2	0
5.5	31.0636	-11.1	0
6	12.8729	-11	0
6.5	4.21314	-10.9	0
7	1.12192	-10.8	0
7.5	0.402616	-10.7	0
8	0.263943	-10.6	0
8.5	0.218331	-10.5	0
9	0.168072	-10.4	0
9.5	0.14051	-10.3	0
10	0.123757	-10.2	0
10.5	0.0999784	-10.1	0
11	0.0641051	-10	0
11.5	0.0513294	-9.9	0
12	0.0456442	-9.8	0
12.5	0.0442175	-9.7	0
13	0.03877	-9.6	0
13.5	0.0320904	-9.5	0
14	0.0261241	-9.4	0
		-9.3	0
		-9.2	0
		-9.1	0
		-9	0
		-8.9	0
		-8.8	0
		-8.7	0
		-8.6	0
		-8.5	0
		-8.4	0
		-8.3	0
		-8.2	0
		-8.1	0.001
		-8	0.22
		-7.9	0.329
		-7.8	0.329
		-7.7	0.329
		-7.6	0.439
		-7.5	0.548
		-7.4	0.44
		-7.3	0.767
		-7.2	0.769
		-7.1	1.208
		-7	1.645
		-6.9	1.757
		-6.8	2.743
		-6.7	3.183
		-6.6	4.06
		-6.5	4.939
		-6.4	6.364
		-6.3	7.681
		-6.2	9.326
		-6.1	11.302
		-6	13.715
		-5.9	16.567
		-5.8	19.968
		-5.7	23.805
		-5.6	27.428
		-5.5	32.362
		-5.4	37.295
		-5.3	42.122
		-5.2	47.605
		-5.1	53.413
		-5	58.24
		-4.9	63.611
		-4.8	68.543
		-4.7	72.818
		-4.6	76.546
		-4.5	80.49
		-4.4	83.123
		-4.3	86.409
		-4.2	88.383
		-4.1	90.575
		-4	92.218
		-3.9	93.534
		-3.8	94.738
		-3.7	95.288
		-3.6	96.492
		-3.5	96.93
		-3.4	97.26
		-3.3	97.807
		-3.2	98.026
		-3.1	98.245
		-3	98.356
		-2.9	98.793
		-2.8	98.903
		-2.7	98.904
		-2.6	99.232
		-2.5	99.451
		-2.4	99.342
		-2.3	99.451
		-2.2	99.56
		-2.1	99.233
		-2	99.451
		-1.9	99.451
		-1.8	99.232
		-1.7	99.342
		-1.6	99.342
		-1.5	99.561
		-1.4	99.78
		-1.3	99.671
		-1.2	99.781
		-1.1	100.109
		-1	100.108
		-0.9	99.78
		-0.8	99.89
		-0.7	99.89
		-0.6	100.108
		-0.5	99.781
		-0.4	100.109
		-0.3	99.998
		-0.2	99.672
		-0.1	100.219
		0	100
		0.1	100.217
		0.2	99.672
		0.3	100
		0.4	100.108
		0.5	99.781
		0.6	100.109
		0.7	99.89
		0.8	99.89
		0.9	99.781
		1	100.109
		1.1	100.108
		1.2	99.78
		1.3	99.671
		1.4	99.78
		1.5	99.561
		1.6	99.342
		1.7	99.341
		1.8	99.233
		1.9	99.451
		2	99.451
		2.1	99.233
		2.2	99.561
		2.3	99.451
		2.4	99.342
		2.5	99.451
		2.6	99.231
		2.7	98.903
		2.8	98.903
		2.9	98.792
		3	98.355
		3.1	98.245
		3.2	98.026
		3.3	97.805
		3.4	97.257
		3.5	96.928
		3.6	96.488
		3.7	95.283
		3.8	94.733
		3.9	93.527
		4	92.21
		4.1	90.564
		4.2	88.372
		4.3	86.395
		4.4	83.107
		4.5	80.472
		4.6	76.525
		4.7	72.796
		4.8	68.518
		4.9	63.583
		5	58.212
		5.1	53.384
		5.2	47.574
		5.3	42.093
		5.4	37.269
		5.5	32.334
		5.6	27.403
		5.7	23.785
		5.8	19.948
		5.9	16.55
		6	13.701
		6.1	11.289
		6.2	9.316
		6.3	7.673
		6.4	6.356
		6.5	4.932
		6.6	4.055
		6.7	3.179
		6.8	2.739
		6.9	1.754
		7	1.643
		7.1	1.205
		7.2	0.768
		7.3	0.766
		7.4	0.439
		7.5	0.548
		7.6	0.438
		7.7	0.329
		7.8	0.329
		7.9	0.328
		8	0
		8.1	0
		8.2	0
		8.3	0
		8.4	0
		8.5	0
		8.6	0
		8.7	0
		8.8	0
		8.9	0
		9	0
		9.1	0
		9.2	0
		9.3	0
		9.4	0
		9.5	0
		9.6	0
		9.7	0
		9.8	0
		9.9	0
		10	0
		10.1	0
		10.2	0
		10.3	0
		10.4	0
		10.5	0
		10.6	0
		10.7	0
		10.8	0
		10.9	0
		11	0
		11.1	0
		11.2	0
		11.3	0
		11.4	0
		11.5	0
		11.6	0
		11.7	0
		11.8	0
		11.9	0
		12	0
		12.1	0
		12.2	0
		12.3	0
		12.4	0
		12.5	0
		12.6	0
		12.7	0
		12.8	0
		12.9	0
		13	0
		13.1	0
		13.2	0
		13.3	0
		13.4	0
		13.5	0
		13.6	0
		13.7	0
		13.8	0
		13.9	0
		14	0
		14.1	0
		14.2	0
		14.3	0
		14.4	0
		14.5	0
		14.6	0
		14.7	0
		14.8	0
		14.9	0

## Sheet: 4
MC		BDM				Depth	2.2	cm	CR
Axis offset (cm)	Dose (%)	Axis offset (cm)	Dose (%)
-14	0.031867	-15	0				Gamma passing rate (%)
-13.5	0.0329562	-14.9	0			2mm/3%	100
-13	0.0371429	-14.8	0			1.5mm/1.5%	94.3503
-12.5	0.0616266	-14.7	0			1mm/1%	92.0904
-12	0.0603112	-14.6	0
-11.5	0.0750919	-14.5	0
-11	0.0898586	-14.4	0
-10.5	0.133904	-14.3	0
-10	0.161386	-14.2	0
-9.5	0.183168	-14.1	0
-9	0.206506	-14	0
-8.5	0.23819	-13.9	0
-8	0.308769	-13.8	0
-7.5	0.430552	-13.7	0
-7	0.955304	-13.6	0
-6.5	3.843	-13.5	0
-6	12.819	-13.4	0
-5.5	31.075	-13.3	0
-5	56.0537	-13.2	0
-4.5	78.3168	-13.1	0
-4	92.4328	-13	0
-3.5	97.6945	-12.9	0
-3	98.628	-12.8	0
-2.5	99.3494	-12.7	0
-2	99.3352	-12.6	0
-1.5	99.5898	-12.5	0
-1	99.7171	-12.4	0
-0.5	99.5332	-12.3	0
0	100	-12.2	0
0.5	99.5615	-12.1	0
1	99.3069	-12	0
1.5	99.2786	-11.9	0
2	99.3211	-11.8	0
2.5	99.4908	-11.7	0
3	98.7553	-11.6	0
3.5	97.4823	-11.5	0
4	92.1216	-11.4	0
4.5	78.6563	-11.3	0
5	56.181	-11.2	0
5.5	31.1033	-11.1	0
6	12.7878	-11	0
6.5	3.76238	-10.9	0
7	0.936209	-10.8	0
7.5	0.406223	-10.7	0
8	0.308769	-10.6	0
8.5	0.240311	-10.5	0
9	0.206931	-10.4	0
9.5	0.202829	-10.3	0
10	0.161952	-10.2	0
10.5	0.13024	-10.1	0
11	0.0888119	-10	0
11.5	0.0770297	-9.9	0
12	0.0619802	-9.8	0
12.5	0.045686	-9.7	0
13	0.0448515	-9.6	0
13.5	0.0394484	-9.5	0
14	0.0328713	-9.4	0
		-9.3	0
		-9.2	0
		-9.1	0
		-9	0
		-8.9	0
		-8.8	0
		-8.7	0
		-8.6	0
		-8.5	0
		-8.4	0
		-8.3	0
		-8.2	0
		-8.1	0.001
		-8	0.264
		-7.9	0.264
		-7.8	0.396
		-7.7	0.264
		-7.6	0.396
		-7.5	0.528
		-7.4	0.53
		-7.3	0.793
		-7.2	0.794
		-7.1	1.058
		-7	1.586
		-6.9	1.852
		-6.8	2.512
		-6.7	3.305
		-6.6	4.099
		-6.5	5.156
		-6.4	6.478
		-6.3	8.197
		-6.2	10.179
		-6.1	12.558
		-6	15.068
		-5.9	17.714
		-5.8	21.543
		-5.7	24.98
		-5.6	29.208
		-5.5	33.568
		-5.4	38.193
		-5.3	43.213
		-5.2	48.232
		-5.1	53.252
		-5	58.272
		-4.9	63.157
		-4.8	67.385
		-4.7	71.744
		-4.6	75.838
		-4.5	79.798
		-4.4	82.573
		-4.3	85.74
		-4.2	87.854
		-4.1	90.098
		-4	91.816
		-3.9	93.53
		-3.8	94.324
		-3.7	95.512
		-3.6	96.567
		-3.5	96.964
		-3.4	97.494
		-3.3	98.284
		-3.2	98.416
		-3.1	98.418
		-3	99.208
		-2.9	99.208
		-2.8	99.078
		-2.7	99.606
		-2.6	99.869
		-2.5	99.738
		-2.4	100.001
		-2.3	100.001
		-2.2	100.132
		-2.1	99.607
		-2	100.528
		-1.9	100
		-1.8	99.606
		-1.7	100.133
		-1.6	100
		-1.5	99.606
		-1.4	99.87
		-1.3	100.132
		-1.2	99.605
		-1.1	99.738
		-1	100.264
		-0.9	100.001
		-0.8	99.87
		-0.7	100.133
		-0.6	100.132
		-0.5	99.737
		-0.4	99.739
		-0.3	100.526
		-0.2	99.342
		-0.1	99.738
		0	100
		0.1	99.736
		0.2	99.344
		0.3	100.526
		0.4	99.737
		0.5	99.738
		0.6	100.133
		0.7	100.132
		0.8	99.869
		0.9	100.002
		1	100.264
		1.1	99.737
		1.2	99.606
		1.3	100.132
		1.4	99.868
		1.5	99.606
		1.6	100.001
		1.7	100.132
		1.8	99.606
		1.9	100.002
		2	100.527
		2.1	99.606
		2.2	100.133
		2.3	100.001
		2.4	100
		2.5	99.737
		2.6	99.868
		2.7	99.603
		2.8	99.076
		2.9	99.208
		3	99.206
		3.1	98.416
		3.2	98.416
		3.3	98.281
		3.4	97.49
		3.5	96.961
		3.6	96.564
		3.7	95.507
		3.8	94.318
		3.9	93.524
		4	91.806
		4.1	90.088
		4.2	87.842
		4.3	85.726
		4.4	82.557
		4.5	79.779
		4.6	75.816
		4.7	71.72
		4.8	67.361
		4.9	63.132
		5	58.244
		5.1	53.225
		5.2	48.205
		5.3	43.185
		5.4	38.166
		5.5	33.543
		5.6	29.184
		5.7	24.959
		5.8	21.523
		5.9	17.695
		6	15.054
		6.1	12.544
		6.2	10.167
		6.3	8.186
		6.4	6.47
		6.5	5.149
		6.6	4.094
		6.7	3.301
		6.8	2.508
		6.9	1.849
		7	1.584
		7.1	1.057
		7.2	0.793
		7.3	0.792
		7.4	0.528
		7.5	0.528
		7.6	0.396
		7.7	0.264
		7.8	0.396
		7.9	0.264
		8	0
		8.1	0
		8.2	0
		8.3	0
		8.4	0
		8.5	0
		8.6	0
		8.7	0
		8.8	0
		8.9	0
		9	0
		9.1	0
		9.2	0
		9.3	0
		9.4	0
		9.5	0
		9.6	0
		9.7	0
		9.8	0
		9.9	0
		10	0
		10.1	0
		10.2	0
		10.3	0
		10.4	0
		10.5	0
		10.6	0
		10.7	0
		10.8	0
		10.9	0
		11	0
		11.1	0
		11.2	0
		11.3	0
		11.4	0
		11.5	0
		11.6	0
		11.7	0
		11.8	0
		11.9	0
		12	0
		12.1	0
		12.2	0
		12.3	0
		12.4	0
		12.5	0
		12.6	0
		12.7	0
		12.8	0
		12.9	0
		13	0
		13.1	0
		13.2	0
		13.3	0
		13.4	0
		13.5	0
		13.6	0
		13.7	0
		13.8	0
		13.9	0
		14	0
		14.1	0
		14.2	0
		14.3	0
		14.4	0
		14.5	0
		14.6	0
		14.7	0
		14.8	0
		14.9	0

## Sheet: 5
MC		BDM				Depth	2.6	cm	CR
Axis offset (cm)	Dose (%)	Axis offset (cm)	Dose (%)
-14	0.0683184	-15	0				Gamma passing rate (%)
-13.5	0.0842985	-14.9	0			2mm/3%	100
-13	0.0871787	-14.8	0			1.5mm/1.5%	97.7401
-12.5	0.121276	-14.7	0			1mm/1%	93.2203
-12	0.137349	-14.6	0
-11.5	0.171632	-14.5	0
-11	0.203066	-14.4	0
-10.5	0.320533	-14.3	0
-10	0.339424	-14.2	0
-9.5	0.392382	-14.1	0
-9	0.41406	-14	0
-8.5	0.467018	-13.9	0
-8	0.590276	-13.8	0
-7.5	0.648188	-13.7	0
-7	0.94921	-13.6	0
-6.5	2.9105	-13.5	0
-6	10.7495	-13.4	0
-5.5	29.7584	-13.3	0
-5	56.4261	-13.2	0
-4.5	80.5203	-13.1	0
-4	93.8061	-13	0
-3.5	98.6993	-12.9	0
-3	99.969	-12.8	0
-2.5	99.8142	-12.7	0
-2	100.155	-12.6	0
-1.5	99.5664	-12.5	0
-1	100.434	-12.4	0
-0.5	99.5355	-12.3	0
0	100	-12.2	0
0.5	99.7832	-12.1	0
1	99.7522	-12	0
1.5	99.6284	-11.9	0
2	100.124	-11.8	0
2.5	99.5664	-11.7	0
3	99.1329	-11.6	0
3.5	97.8941	-11.5	0
4	93.6513	-11.4	0
4.5	80.0867	-11.3	0
5	56.1164	-11.2	0
5.5	29.4085	-11.1	0
6	10.9848	-11	0
6.5	2.78569	-10.9	0
7	0.932177	-10.8	0
7.5	0.659957	-10.7	0
8	0.580056	-10.6	0
8.5	0.486528	-10.5	0
9	0.436977	-10.4	0
9.5	0.355528	-10.3	0
10	0.356767	-10.2	0
10.5	0.288696	-10.1	0
11	0.198916	-10	0
11.5	0.17188	-9.9	0
12	0.164726	-9.8	0
12.5	0.11406	-9.7	0
13	0.120688	-9.6	0
13.5	0.0953546	-9.5	0
14	0.057572	-9.4	0
		-9.3	0
		-9.2	0
		-9.1	0
		-9	0
		-8.9	0
		-8.8	0
		-8.7	0
		-8.6	0
		-8.5	0
		-8.4	0
		-8.3	0
		-8.2	0
		-8.1	0.001
		-8	0.408
		-7.9	0.408
		-7.8	0.408
		-7.7	0.409
		-7.6	0.612
		-7.5	0.611
		-7.4	0.409
		-7.3	0.612
		-7.2	0.614
		-7.1	1.022
		-7	1.43
		-6.9	1.635
		-6.8	2.45
		-6.7	2.859
		-6.6	3.473
		-6.5	4.698
		-6.4	5.924
		-6.3	7.761
		-6.2	9.599
		-6.1	11.845
		-6	14.296
		-5.9	17.562
		-5.8	21.032
		-5.7	24.911
		-5.6	29.198
		-5.5	33.891
		-5.4	38.178
		-5.3	43.077
		-5.2	48.181
		-5.1	54.093
		-5	57.974
		-4.9	63.075
		-4.8	67.972
		-4.7	72.255
		-4.6	75.931
		-4.5	80.418
		-4.4	83.887
		-4.3	87.353
		-4.2	89.599
		-4.1	92.25
		-4	94.085
		-3.9	95.31
		-3.8	96.737
		-3.7	97.758
		-3.6	98.98
		-3.5	99.387
		-3.4	99.183
		-3.3	99.183
		-3.2	99.184
		-3.1	99.386
		-3	98.777
		-2.9	99.387
		-2.8	99.388
		-2.7	99.798
		-2.6	100.815
		-2.5	100.612
		-2.4	100.612
		-2.3	100.813
		-2.2	100
		-2.1	100.201
		-2	99.388
		-1.9	99.59
		-1.8	98.981
		-1.7	99.592
		-1.6	99.796
		-1.5	99.999
		-1.4	99.799
		-1.3	101.222
		-1.2	100.612
		-1.1	100.612
		-1	100.406
		-0.9	100.001
		-0.8	100.613
		-0.7	101.02
		-0.6	101.017
		-0.5	100.204
		-0.4	100.408
		-0.3	100.408
		-0.2	100.408
		-0.1	100.203
		0	100
		0.1	100.204
		0.2	100.408
		0.3	100.408
		0.4	100.408
		0.5	100.206
		0.6	101.02
		0.7	101.019
		0.8	100.61
		0.9	100.001
		1	100.408
		1.1	100.612
		1.2	100.613
		1.3	101.22
		1.4	99.796
		1.5	99.999
		1.6	99.795
		1.7	99.59
		1.8	98.981
		1.9	99.591
		2	99.39
		2.1	100.203
		2.2	100.002
		2.3	100.816
		2.4	100.612
		2.5	100.612
		2.6	100.813
		2.7	99.794
		2.8	99.387
		2.9	99.386
		3	98.777
		3.1	99.387
		3.2	99.183
		3.3	99.183
		3.4	99.184
		3.5	99.386
		3.6	98.976
		3.7	97.752
		3.8	96.73
		3.9	95.303
		4	94.076
		4.1	92.238
		4.2	89.586
		4.3	87.338
		4.4	83.868
		4.5	80.396
		4.6	75.909
		4.7	72.234
		4.8	67.947
		4.9	63.048
		5	57.95
		5.1	54.066
		5.2	48.151
		5.3	43.049
		5.4	38.153
		5.5	33.866
		5.6	29.173
		5.7	24.889
		5.8	21.012
		5.9	17.543
		6	14.28
		6.1	11.831
		6.2	9.588
		6.3	7.751
		6.4	5.916
		6.5	4.691
		6.6	3.468
		6.7	2.856
		6.8	2.447
		6.9	1.633
		7	1.427
		7.1	1.019
		7.2	0.612
		7.3	0.612
		7.4	0.408
		7.5	0.612
		7.6	0.612
		7.7	0.408
		7.8	0.408
		7.9	0.407
		8	0
		8.1	0
		8.2	0
		8.3	0
		8.4	0
		8.5	0
		8.6	0
		8.7	0
		8.8	0
		8.9	0
		9	0
		9.1	0
		9.2	0
		9.3	0
		9.4	0
		9.5	0
		9.6	0
		9.7	0
		9.8	0
		9.9	0
		10	0
		10.1	0
		10.2	0
		10.3	0
		10.4	0
		10.5	0
		10.6	0
		10.7	0
		10.8	0
		10.9	0
		11	0
		11.1	0
		11.2	0
		11.3	0
		11.4	0
		11.5	0
		11.6	0
		11.7	0
		11.8	0
		11.9	0
		12	0
		12.1	0
		12.2	0
		12.3	0
		12.4	0
		12.5	0
		12.6	0
		12.7	0
		12.8	0
		12.9	0
		13	0
		13.1	0
		13.2	0
		13.3	0
		13.4	0
		13.5	0
		13.6	0
		13.7	0
		13.8	0
		13.9	0
		14	0
		14.1	0
		14.2	0
		14.3	0
		14.4	0
		14.5	0
		14.6	0
		14.7	0
		14.8	0
		14.9	0
