# Supplementary material for: Monte Carlo simulation for scanning technique with scattering foil free electron beam: A proof of concept study
Source: PLoS One. 2017 May 11;12(5):e0177380. doi: 10.1371/journal.pone.0177380 (PMC5426680; doi:10.1371/journal.pone.0177380)
Supplement: S2 Table — The 6 MeV electron beams with a field size of 1 cm by 1 cm, which were collimated by the multi-leaf collimators are shown with and without scattering foil. (XLSX) [file pone.0177380.s002.xlsx]

## Sheet: PDD
		woCone 1x1 defined at MLC placement (~SSD 56), phatom placed at SSD60										woCone 1x1 defined at MLC placement (~SSD 56), phatom placed at SSD60
		SFF	both Up & Down foil removed					Jaw open 40x40 SSD 100				SF							Jaw open 40x40 SSD 100
		DOSXYZnrc ($Revision:1.50 $) Dose outputs (dose/F, Gy.cm**2)										DOSXYZnrc ($Revision:1.50 $) Dose outputs (dose/F, Gy.cm**2)
		for x= -0.250 to 0.250 i= 29										for x= -0.250 to 0.250 i= 29
		ybounds: -0.250 0.250										ybounds: -0.250 0.250
		j= 29										j= 29
		zbounds ( -0.100)						Depth (cm)	Dose(%)			zbounds ( -0.100)							Depth (cm)	Dose(%)
		0.1	1	3.557e-12	0			0	95.5926			0.1	1	1.574e-13	-0.001				0	96.7425
		0.3	2	3.692e-12	0			0.2	99.2206			0.3	2	1.627e-13	-0.001				0.2	100
		0.5	3	3.721e-12	0			0.4	100			0.5	3	1.626e-13	-0.001				0.4	99.9385
		0.7	4	3.684e-12	0			0.6	99.0056			0.7	4	1.581e-13	-0.001				0.6	97.1727
		0.9	5	3.57e-12	0			0.8	95.942			0.9	5	1.493e-13	-0.001				0.8	91.764
								-0.1	0										-0.1	0
		1.1	6	3.367e-12	0			1	90.4864			1.1	6	1.365e-13	-0.001				1	83.8967
		1.2	7	3.165e-12	0			1.1	85.0578			1.2	7	1.251e-13	-0.001				1.1	76.89
		1.4	8	2.92e-12	0			1.3	78.4735			1.4	8	1.128e-13	-0.001				1.3	69.3301
		1.6	9	2.565e-12	0			1.5	68.9331			1.6	9	9.643e-14	-0.001				1.5	59.2686
		1.8	10	2.206e-12	0			1.7	59.2851			1.8	10	8.081e-14	-0.001				1.7	49.6681
								-0.1	0										-0.1	0
		2	11	1.87e-12	0			1.9	50.2553			2	11	6.708e-14	-0.001				1.9	41.2293
		2.1	12	1.642e-12	0			2	44.1279			2.1	12	5.781e-14	-0.002				2	35.5317
		2.3	13	1.432e-12	0			2.2	38.4843			2.3	13	4.897e-14	-0.002				2.2	30.0983
		2.5	14	1.176e-12	0			2.4	31.6044			2.5	14	3.77e-14	-0.002				2.4	23.1715
		2.7	15	9.364e-13	-0.001			2.6	25.1653			2.7	15	2.652e-14	-0.002				2.6	16.2999
								-0.1	0										-0.1	0
		3	16	6.356e-13	-0.001			2.9	17.0814			3	16	1.354e-14	-0.003				2.9	8.32207
		3.5	17	2.054e-13	-0.001			3.4	5.52002			3.5	17	2.582e-15	-0.005				3.4	1.58697
		4	18	6.195e-15	-0.004			3.9	0.166488			4	18	1.197e-15	-0.007				3.9	0.73571
		4.4	19	2.603e-15	-0.007			4.3	0.0699543			4.4	19	1.119e-15	-0.008				4.3	0.687769
		4.8	20	2.294e-15	-0.007			4.7	0.0616501			4.8	20	1.082e-15	-0.008				4.7	0.665028
								-0.1	0										-0.1	0
		5.2	21	2.015e-15	-0.008			5.1	0.0541521			5.2	21	1.044e-15	-0.008				5.1	0.641672
		5.6	22	1.835e-15	-0.008			5.5	0.0493147			5.6	22	1.007e-15	-0.008				5.5	0.618931
		6	23	1.66e-15	-0.009			5.9	0.0446117			6	23	9.653e-16	-0.009				5.9	0.593301

## Sheet: D1.3cm CR
		woCone 1x1 defined at MLC placement (~SSD 56), phatom placed at SSD60										woCone 1x1 defined at MLC placement (~SSD 56), phatom placed at SSD60
		SFF	both Up & Down foil removed					Jaw open 40x40 SSD 100				SF							Jaw open 40x40 SSD 100
		DOSXYZnrc ($Revision:1.50 $) Dose outputs (dose/F, Gy.cm**2)										DOSXYZnrc ($Revision:1.50 $) Dose outputs (dose/F, Gy.cm**2)
		for z= 1.200 to 1.400 k= 8										for z= 1.200 to 1.400 k= 8
		ybounds: -0.250 0.250										ybounds: -0.250 0.250
		j= 29										j= 29
		xbounds ( -14.250)						Xcenter	Dose(%)			xbounds ( -14.250)							Xcenter	Dose(%)
		-13.75	1	1.645e-17	-0.106			-14	0.000563356			-13.75	1	8.152e-18	-0.122				-14	0.00722695
		-13.25	2	1.558e-17	-0.106			-13.5	0.000533562			-13.25	2	7.799e-18	-0.116				-13.5	0.00691401
		-12.75	3	1.602e-17	-0.107			-13	0.00054863			-12.75	3	1.051e-17	-0.105				-13	0.00931738
		-12.25	4	1.747e-17	-0.098			-12.5	0.000598288			-12.25	4	1.289e-17	-0.097				-12.5	0.0114273
		-11.75	5	2.502e-17	-0.091			-12	0.000856849			-11.75	5	1.145e-17	-0.098				-12	0.0101507
								-0.25	0										-0.25	0
		-11.25	6	3.02e-17	-0.082			-11.5	0.00103425			-11.25	6	1.391e-17	-0.086				-11.5	0.0123316
		-10.75	7	3.908e-17	-0.076			-11	0.00133836			-10.75	7	1.819e-17	-0.08				-11	0.0161259
		-10.25	8	4.32e-17	-0.07			-10.5	0.00147945			-10.25	8	1.666e-17	-0.084				-10.5	0.0147695
		-9.75	9	5.107e-17	-0.066			-10	0.00174897			-9.75	9	1.559e-17	-0.082				-10	0.0138209
		-9.25	10	6.6e-17	-0.058			-9.5	0.00226027			-9.25	10	2.724e-17	-0.072				-9.5	0.0241489
								-0.25	0										-0.25	0
		-8.75	11	7.548e-17	-0.053			-9	0.00258493			-8.75	11	2.378e-17	-0.071				-9	0.0210816
		-8.25	12	9.187e-17	-0.051			-8.5	0.00314623			-8.25	12	2.819e-17	-0.067				-8.5	0.0249911
		-7.75	13	9.84e-17	-0.047			-8	0.00336986			-7.75	13	2.98e-17	-0.063				-8	0.0264184
		-7.25	14	1.441e-16	-0.04			-7.5	0.00493493			-7.25	14	2.825e-17	-0.065				-7.5	0.0250443
		-6.75	15	1.783e-16	-0.038			-7	0.00610616			-6.75	15	3.362e-17	-0.059				-7	0.029805
								-0.25	0										-0.25	0
		-6.25	16	2.709e-16	-0.031			-6.5	0.0092774			-6.25	16	4.477e-17	-0.052				-6.5	0.0396897
		-5.75	17	4.312e-16	-0.025			-6	0.0147671			-5.75	17	4.29e-17	-0.054				-6	0.0380319
		-5.25	18	9.063e-16	-0.018			-5.5	0.0310377			-5.25	18	5.955e-17	-0.048				-5.5	0.0527926
		-4.75	19	1.988e-15	-0.012			-5	0.0680822			-4.75	19	1.095e-16	-0.036				-5	0.0970745
		-4.25	20	4.333e-15	-0.008			-4.5	0.14839			-4.25	20	2.017e-16	-0.027				-4.5	0.178812
								-0.25	0										-0.25	0
		-3.75	21	9.742e-15	-0.005			-4	0.33363			-3.75	21	4.262e-16	-0.019				-4	0.377837
		-3.25	22	1.934e-14	-0.004			-3.5	0.662329			-3.25	22	8.148e-16	-0.014				-3.5	0.72234
		-2.75	23	3.017e-14	-0.003			-3	1.03322			-2.75	23	1.309e-15	-0.011				-3	1.16046
		-2.25	24	4.85e-14	-0.002			-2.5	1.66096			-2.25	24	2.177e-15	-0.008				-2.5	1.92996
		-1.75	25	9.018e-14	-0.002			-2	3.08836			-1.75	25	4.511e-15	-0.006				-2	3.99911
								-0.25	0										-0.25	0
		-1.25	26	2.297e-13	-0.001			-1.5	7.86644			-1.25	26	1.204e-14	-0.004				-1.5	10.6738
		-0.75	27	8.37e-13	-0.001			-1	28.6644			-0.75	27	3.723e-14	-0.002				-1	33.0053
		-0.25	28	2.185e-12	0			-0.5	74.8288			-0.25	28	8.58e-14	-0.001				-0.5	76.0638
		0.25	29	2.92e-12	0			0	100			0.25	29	1.128e-13	-0.001				0	100
		0.75	30	2.175e-12	0			0.5	74.4863			0.75	30	8.557e-14	-0.001				0.5	75.8599
								-0.25	0										-0.25	0
		1.25	31	8.316e-13	-0.001			1	28.4795			1.25	31	3.723e-14	-0.002				1	33.0053
		1.75	32	2.282e-13	-0.001			1.5	7.81507			1.75	32	1.209e-14	-0.004				1.5	10.7181
		2.25	33	8.97e-14	-0.002			2	3.07192			2.25	33	4.603e-15	-0.006				2	4.08067
		2.75	34	4.824e-14	-0.002			2.5	1.65205			2.75	34	2.205e-15	-0.008				2.5	1.95479
		3.25	35	3.046e-14	-0.003			3	1.04315			3.25	35	1.306e-15	-0.011				3	1.1578
								-0.25	0										-0.25	0
		3.75	36	1.94e-14	-0.004			3.5	0.664384			3.75	36	8.17e-16	-0.014				3.5	0.724291
		4.25	37	9.661e-15	-0.005			4	0.330856			4.25	37	4.466e-16	-0.019				4	0.395922
		4.75	38	4.363e-15	-0.008			4.5	0.149418			4.75	38	2.154e-16	-0.027				4.5	0.190957
		5.25	39	2e-15	-0.012			5	0.0684932			5.25	39	1.063e-16	-0.037				5	0.0942376
		5.75	40	9.358e-16	-0.017			5.5	0.0320479			5.75	40	6.43e-17	-0.046				5.5	0.0570035
								-0.25	0										-0.25	0
		6.25	41	4.685e-16	-0.024			6	0.0160445			6.25	41	4.228e-17	-0.053				6	0.0374823
		6.75	42	2.952e-16	-0.03			6.5	0.0101096			6.75	42	3.774e-17	-0.057				6.5	0.0334574
		7.25	43	1.959e-16	-0.036			7	0.0067089			7.25	43	3.182e-17	-0.06				7	0.0282092
		7.75	44	1.501e-16	-0.041			7.5	0.00514041			7.75	44	3.016e-17	-0.063				7.5	0.0267376
		8.25	45	1.174e-16	-0.044			8	0.00402055			8.25	45	2.847e-17	-0.063				8	0.0252394
								-0.25	0										-0.25	0
		8.75	46	8.713e-17	-0.049			8.5	0.0029839			8.75	46	2.405e-17	-0.072				8.5	0.0213209
		9.25	47	6.82e-17	-0.058			9	0.00233562			9.25	47	2.54e-17	-0.069				9	0.0225177
		9.75	48	5.736e-17	-0.059			9.5	0.00196438			9.75	48	2.41e-17	-0.07				9.5	0.0213652
		10.25	49	5.618e-17	-0.063			10	0.00192397			10.25	49	2.148e-17	-0.074				10	0.0190426
		10.75	50	4.357e-17	-0.072			10.5	0.00149212			10.75	50	1.998e-17	-0.077				10.5	0.0177128
								-0.25	0										-0.25	0
		11.25	51	3.578e-17	-0.078			11	0.00122534			11.25	51	1.487e-17	-0.086				11	0.0131826
		11.75	52	2.856e-17	-0.086			11.5	0.000978082			11.75	52	1.658e-17	-0.082				11.5	0.0146986
		12.25	53	2.418e-17	-0.09			12	0.000828082			12.25	53	1.379e-17	-0.09				12	0.0122252
		12.75	54	2.355e-17	-0.095			12.5	0.000806507			12.75	54	1.276e-17	-0.09				12.5	0.0113121
		13.25	55	2.215e-17	-0.097			13	0.000758562			13.25	55	1.093e-17	-0.096				13	0.00968972
								-0.25	0										-0.25	0
		13.75	56	1.604e-17	-0.11			13.5	0.000549315			13.75	56	9.407e-18	-0.113				13.5	0.00833954
		14.25	57	1.126e-17	-0.14			14	0.000385616			14.25	57	6.954e-18	-0.137				14	0.00616489

## Sheet: D1.7cm CR
		woCone 1x1 defined at MLC placement (~SSD 56), phatom placed at SSD60										woCone 1x1 defined at MLC placement (~SSD 56), phatom placed at SSD60
		SFF	both Up & Down foil removed					Jaw open 40x40 SSD 100				SF							Jaw open 40x40 SSD 100
		DOSXYZnrc ($Revision:1.50 $) Dose outputs (dose/F, Gy.cm**2)										DOSXYZnrc ($Revision:1.50 $) Dose outputs (dose/F, Gy.cm**2)
		for z= 1.600 to 1.800 k= 10										for z= 1.600 to 1.800 k= 10
		ybounds: -0.250 0.250										ybounds: -0.250 0.250
		j= 29										j= 29
		xbounds ( -14.250)						Xcenter	Dose(%)			xbounds ( -14.250)							Xcenter	Dose(%)
		-13.75	1	1.291e-17	-0.107			-14	0.000585222			-13.75	1	7.289e-18	-0.129				-14	0.00901992
		-13.25	2	1.238e-17	-0.125			-13.5	0.000561197			-13.25	2	1.013e-17	-0.109				-13.5	0.0125356
		-12.75	3	1.787e-17	-0.106			-13	0.000810063			-12.75	3	9.744e-18	-0.105				-13	0.0120579
		-12.25	4	2.047e-17	-0.097			-12.5	0.000927924			-12.25	4	8.495e-18	-0.105				-12.5	0.0105123
		-11.75	5	2.806e-17	-0.087			-12	0.00127199			-11.75	5	1.283e-17	-0.096				-12	0.0158767
								-0.25	0										-0.25	0
		-11.25	6	3.077e-17	-0.082			-11.5	0.00139483			-11.25	6	1.298e-17	-0.093				-11.5	0.0160624
		-10.75	7	3.591e-17	-0.074			-11	0.00162783			-10.75	7	1.701e-17	-0.087				-11	0.0210494
		-10.25	8	4.058e-17	-0.072			-10.5	0.00183953			-10.25	8	1.591e-17	-0.081				-10.5	0.0196882
		-9.75	9	5.049e-17	-0.063			-10	0.00228876			-9.75	9	1.732e-17	-0.083				-10	0.021433
		-9.25	10	5.413e-17	-0.062			-9.5	0.00245376			-9.25	10	2.2e-17	-0.074				-9.5	0.0272244
								-0.25	0										-0.25	0
		-8.75	11	6.181e-17	-0.059			-9	0.0028019			-8.75	11	2.286e-17	-0.07				-9	0.0282886
		-8.25	12	7.275e-17	-0.053			-8.5	0.00329782			-8.25	12	2.335e-17	-0.07				-8.5	0.0288949
		-7.75	13	9.386e-17	-0.048			-8	0.00425476			-7.75	13	2.53e-17	-0.07				-8	0.031308
		-7.25	14	1.138e-16	-0.045			-7.5	0.00515866			-7.25	14	2.67e-17	-0.066				-7.5	0.0330405
		-6.75	15	1.514e-16	-0.039			-7	0.0068631			-6.75	15	3.072e-17	-0.063				-7	0.0380151
								-0.25	0										-0.25	0
		-6.25	16	2.066e-16	-0.034			-6.5	0.00936537			-6.25	16	3.869e-17	-0.055				-6.5	0.0478777
		-5.75	17	3.466e-16	-0.027			-6	0.0157117			-5.75	17	4.135e-17	-0.053				-6	0.0511694
		-5.25	18	8.039e-16	-0.018			-5.5	0.0364415			-5.25	18	5.459e-17	-0.049				-5.5	0.0675535
		-4.75	19	1.996e-15	-0.012			-5	0.0904805			-4.75	19	9.034e-17	-0.039				-5	0.111793
		-4.25	20	4.768e-15	-0.008			-4.5	0.216138			-4.25	20	1.881e-16	-0.028				-4.5	0.232768
								-0.25	0										-0.25	0
		-3.75	21	1.008e-14	-0.005			-4	0.456936			-3.75	21	3.771e-16	-0.02				-4	0.46665
		-3.25	22	1.78e-14	-0.004			-3.5	0.80689			-3.25	22	6.868e-16	-0.015				-3.5	0.849895
		-2.75	23	2.911e-14	-0.003			-3	1.31958			-2.75	23	1.114e-15	-0.012				-3	1.37854
		-2.25	24	5.588e-14	-0.002			-2.5	2.53309			-2.25	24	2.201e-15	-0.008				-2.5	2.72367
		-1.75	25	1.278e-13	-0.001			-2	5.79329			-1.75	25	5.441e-15	-0.005				-2	6.73308
								-0.25	0										-0.25	0
		-1.25	26	3.29e-13	-0.001			-1.5	14.9139			-1.25	26	1.446e-14	-0.003				-1.5	17.8938
		-0.75	27	8.725e-13	-0.001			-1	39.5512			-0.75	27	3.504e-14	-0.002				-1	43.361
		-0.25	28	1.749e-12	0			-0.5	79.2838			-0.25	28	6.545e-14	-0.001				-0.5	80.9925
		0.25	29	2.206e-12	0			0	100			0.25	29	8.081e-14	-0.001				0	100
		0.75	30	1.743e-12	0			0.5	79.0118			0.75	30	6.539e-14	-0.001				0.5	80.9182
								-0.25	0										-0.25	0
		1.25	31	8.677e-13	-0.001			1	39.3336			1.25	31	3.505e-14	-0.002				1	43.3733
		1.75	32	3.274e-13	-0.001			1.5	14.8413			1.75	32	1.456e-14	-0.003				1.5	18.0176
		2.25	33	1.277e-13	-0.001			2	5.78876			2.25	33	5.589e-15	-0.005				2	6.91622
		2.75	34	5.593e-14	-0.002			2.5	2.53536			2.75	34	2.226e-15	-0.008				2.5	2.75461
		3.25	35	2.916e-14	-0.003			3	1.32185			3.25	35	1.125e-15	-0.011				3	1.39215
								-0.25	0										-0.25	0
		3.75	36	1.781e-14	-0.004			3.5	0.807344			3.75	36	6.875e-16	-0.015				3.5	0.850761
		4.25	37	9.951e-15	-0.005			4	0.451088			4.25	37	3.896e-16	-0.02				4	0.482119
		4.75	38	4.784e-15	-0.008			4.5	0.216863			4.75	38	1.989e-16	-0.027				4.5	0.246133
		5.25	39	2.025e-15	-0.012			5	0.0917951			5.25	39	9.169e-17	-0.04				5	0.113464
		5.75	40	7.984e-16	-0.018			5.5	0.0361922			5.75	40	5.638e-17	-0.049				5.5	0.0697686
								-0.25	0										-0.25	0
		6.25	41	3.609e-16	-0.027			6	0.0163599			6.25	41	4.017e-17	-0.057				6	0.0497092
		6.75	42	2.289e-16	-0.032			6.5	0.0103762			6.75	42	3.306e-17	-0.059				6.5	0.0409108
		7.25	43	1.577e-16	-0.038			7	0.00714869			7.25	43	2.954e-17	-0.063				7	0.0365549
		7.75	44	1.192e-16	-0.044			7.5	0.00540345			7.75	44	2.777e-17	-0.064				7.5	0.0343646
		8.25	45	1.025e-16	-0.048			8	0.00464642			8.25	45	2.751e-17	-0.065				8	0.0340428
								-0.25	0										-0.25	0
		8.75	46	7.578e-17	-0.053			8.5	0.00343518			8.75	46	2.651e-17	-0.067				8.5	0.0328053
		9.25	47	6.577e-17	-0.058			9	0.00298141			9.25	47	2.385e-17	-0.069				9	0.0295137
		9.75	48	5.682e-17	-0.061			9.5	0.0025757			9.75	48	1.962e-17	-0.079				9.5	0.0242792
		10.25	49	5.047e-17	-0.066			10	0.00228785			10.25	49	2.198e-17	-0.074				10	0.0271996
		10.75	50	4.288e-17	-0.069			10.5	0.00194379			10.75	50	1.71e-17	-0.084				10.5	0.0211607
								-0.25	0										-0.25	0
		11.25	51	3.224e-17	-0.077			11	0.00146147			11.25	51	1.555e-17	-0.086				11	0.0192427
		11.75	52	2.466e-17	-0.086			11.5	0.00111786			11.75	52	1.697e-17	-0.083				11.5	0.0209999
		12.25	53	2.411e-17	-0.094			12	0.00109293			12.25	53	1.443e-17	-0.09				12	0.0178567
		12.75	54	2.023e-17	-0.099			12.5	0.000917044			12.75	54	1.366e-17	-0.095				12.5	0.0169038
		13.25	55	1.683e-17	-0.097			13	0.000762919			13.25	55	1.284e-17	-0.096				13	0.0158891
								-0.25	0										-0.25	0
		13.75	56	1.807e-17	-0.105			13.5	0.00081913			13.75	56	1.077e-17	-0.106				13.5	0.0133276
		14.25	57	1.247e-17	-0.132			14	0.000565277			14.25	57	8.162e-18	-0.118				14	0.0101002

## Sheet: D1.9cm CR
		woCone 1x1 defined at MLC placement (~SSD 56), phatom placed at SSD60										woCone 1x1 defined at MLC placement (~SSD 56), phatom placed at SSD60
		SFF	both Up & Down foil removed					Jaw open 40x40 SSD 100				SF							Jaw open 40x40 SSD 100
		DOSXYZnrc ($Revision:1.50 $) Dose outputs (dose/F, Gy.cm**2)										DOSXYZnrc ($Revision:1.50 $) Dose outputs (dose/F, Gy.cm**2)
		for z= 1.800 to 2.000 k= 11										for z= 1.800 to 2.000 k= 11
		ybounds: -0.250 0.250										ybounds: -0.250 0.250
		j= 29										j= 29
		xbounds ( -14.250)						Xcenter	Dose(%)			xbounds ( -14.250)							Xcenter	Dose(%)
		-13.75	1	1.518e-17	-0.123			-14	0.000811765			-13.75	1	6.968e-18	-0.126				-14	0.0103876
		-13.25	2	1.703e-17	-0.12			-13.5	0.000910695			-13.25	2	8.762e-18	-0.112				-13.5	0.013062
		-12.75	3	1.901e-17	-0.102			-13	0.00101658			-12.75	3	9.382e-18	-0.104				-13	0.0139863
		-12.25	4	2.101e-17	-0.092			-12.5	0.00112353			-12.25	4	1.095e-17	-0.102				-12.5	0.0163238
		-11.75	5	2.438e-17	-0.086			-12	0.00130374			-11.75	5	1.149e-17	-0.097				-12	0.0171288
								-0.25	0										-0.25	0
		-11.25	6	3.09e-17	-0.082			-11.5	0.00165241			-11.25	6	1.293e-17	-0.098				-11.5	0.0192755
		-10.75	7	3.789e-17	-0.073			-11	0.0020262			-10.75	7	1.833e-17	-0.08				-11	0.0273256
		-10.25	8	4.455e-17	-0.072			-10.5	0.00238235			-10.25	8	1.587e-17	-0.081				-10.5	0.0236583
		-9.75	9	5.252e-17	-0.063			-10	0.00280856			-9.75	9	1.595e-17	-0.084				-10	0.0237776
		-9.25	10	5.17e-17	-0.061			-9.5	0.00276471			-9.25	10	2.016e-17	-0.073				-9.5	0.0300537
								-0.25	0										-0.25	0
		-8.75	11	6.101e-17	-0.059			-9	0.00326257			-8.75	11	2.454e-17	-0.068				-9	0.0365832
		-8.25	12	7.089e-17	-0.053			-8.5	0.00379091			-8.25	12	2.192e-17	-0.072				-8.5	0.0326774
		-7.75	13	8.814e-17	-0.05			-8	0.00471337			-7.75	13	2.233e-17	-0.072				-8	0.0332886
		-7.25	14	1.039e-16	-0.046			-7.5	0.00555615			-7.25	14	2.914e-17	-0.063				-7.5	0.0434407
		-6.75	15	1.411e-16	-0.04			-7	0.00754545			-6.75	15	3.065e-17	-0.063				-7	0.0456917
								-0.25	0										-0.25	0
		-6.25	16	2.014e-16	-0.035			-6.5	0.0107701			-6.25	16	3.626e-17	-0.061				-6.5	0.0540549
		-5.75	17	2.917e-16	-0.029			-6	0.0155989			-5.75	17	3.778e-17	-0.057				-6	0.0563208
		-5.25	18	6.799e-16	-0.02			-5.5	0.0363583			-5.25	18	4.872e-17	-0.052				-5.5	0.0726297
		-4.75	19	1.785e-15	-0.013			-5	0.0954545			-4.75	19	8.006e-17	-0.042				-5	0.11935
		-4.25	20	4.446e-15	-0.008			-4.5	0.237754			-4.25	20	1.604e-16	-0.03				-4.5	0.239117
								-0.25	0										-0.25	0
		-3.75	21	9.181e-15	-0.005			-4	0.490963			-3.75	21	3.247e-16	-0.021				-4	0.484049
		-3.25	22	1.601e-14	-0.004			-3.5	0.85615			-3.25	22	5.978e-16	-0.016				-3.5	0.891175
		-2.75	23	2.676e-14	-0.003			-3	1.43102			-2.75	23	9.577e-16	-0.012				-3	1.4277
		-2.25	24	5.605e-14	-0.002			-2.5	2.99733			-2.25	24	1.997e-15	-0.009				-2.5	2.97704
		-1.75	25	1.396e-13	-0.001			-2	7.46524			-1.75	25	5.257e-15	-0.005				-2	7.83691
								-0.25	0										-0.25	0
		-1.25	26	3.548e-13	-0.001			-1.5	18.9733			-1.25	26	1.411e-14	-0.003				-1.5	21.0346
		-0.75	27	8.394e-13	-0.001			-1	44.8877			-0.75	27	3.2e-14	-0.002				-1	47.7042
		-0.25	28	1.526e-12	0			-0.5	81.6043			-0.25	28	5.563e-14	-0.002				-0.5	82.9308
		0.25	29	1.87e-12	0			0	100			0.25	29	6.708e-14	-0.001				0	100
		0.75	30	1.521e-12	0			0.5	81.3369			0.75	30	5.551e-14	-0.002				0.5	82.7519
								-0.25	0										-0.25	0
		1.25	31	8.354e-13	-0.001			1	44.6738			1.25	31	3.188e-14	-0.002				1	47.5253
		1.75	32	3.532e-13	-0.001			1.5	18.8877			1.75	32	1.419e-14	-0.003				1.5	21.1538
		2.25	33	1.392e-13	-0.001			2	7.44385			2.25	33	5.355e-15	-0.005				2	7.98301
		2.75	34	5.597e-14	-0.002			2.5	2.99305			2.75	34	2.012e-15	-0.009				2.5	2.9994
		3.25	35	2.679e-14	-0.003			3	1.43262			3.25	35	9.669e-16	-0.012				3	1.44141
								-0.25	0										-0.25	0
		3.75	36	1.604e-14	-0.004			3.5	0.857754			3.75	36	5.749e-16	-0.016				3.5	0.857036
		4.25	37	9.155e-15	-0.005			4	0.489572			4.25	37	3.292e-16	-0.021				4	0.490757
		4.75	38	4.452e-15	-0.008			4.5	0.238075			4.75	38	1.68e-16	-0.03				4.5	0.250447
		5.25	39	1.838e-15	-0.012			5	0.0982888			5.25	39	7.8e-17	-0.042				5	0.116279
		5.75	40	6.744e-16	-0.02			5.5	0.0360642			5.75	40	4.703e-17	-0.052				5.5	0.0701103
								-0.25	0										-0.25	0
		6.25	41	3.124e-16	-0.028			6	0.0167059			6.25	41	3.893e-17	-0.056				6	0.0580352
		6.75	42	2.026e-16	-0.034			6.5	0.0108342			6.75	42	3.116e-17	-0.061				6.5	0.046452
		7.25	43	1.408e-16	-0.04			7	0.00752941			7.25	43	2.674e-17	-0.064				7	0.0398629
		7.75	44	1.097e-16	-0.044			7.5	0.00586631			7.75	44	2.807e-17	-0.063				7.5	0.0418456
		8.25	45	8.423e-17	-0.048			8	0.00450428			8.25	45	2.485e-17	-0.067				8	0.0370453
								-0.25	0										-0.25	0
		8.75	46	7.014e-17	-0.054			8.5	0.0037508			8.75	46	2.429e-17	-0.07				8.5	0.0362105
		9.25	47	6.915e-17	-0.057			9	0.00369786			9.25	47	2.53e-17	-0.071				9	0.0377162
		9.75	48	6.071e-17	-0.059			9.5	0.00324652			9.75	48	2.101e-17	-0.076				9.5	0.0313208
		10.25	49	4.52e-17	-0.066			10	0.00241711			10.25	49	2.205e-17	-0.072				10	0.0328712
		10.75	50	4.636e-17	-0.068			10.5	0.00247914			10.75	50	1.746e-17	-0.083				10.5	0.0260286
								-0.25	0										-0.25	0
		11.25	51	3.227e-17	-0.082			11	0.00172567			11.25	51	1.594e-17	-0.086				11	0.0237627
		11.75	52	2.866e-17	-0.087			11.5	0.00153262			11.75	52	1.558e-17	-0.086				11.5	0.023226
		12.25	53	2.544e-17	-0.089			12	0.00136043			12.25	53	1.375e-17	-0.093				12	0.0204979
		12.75	54	2.041e-17	-0.093			12.5	0.00109144			12.75	54	1.486e-17	-0.092				12.5	0.0221527
		13.25	55	1.772e-17	-0.1			13	0.000947594			13.25	55	1.192e-17	-0.097				13	0.0177698
								-0.25	0										-0.25	0
		13.75	56	1.893e-17	-0.1			13.5	0.0010123			13.75	56	9.309e-18	-0.111				13.5	0.0138775
		14.25	57	1.486e-17	-0.113			14	0.000794652			14.25	57	7.077e-18	-0.13				14	0.0105501

## Sheet: D2.2cm CR
		woCone 1x1 defined at MLC placement (~SSD 56), phatom placed at SSD60										woCone 1x1 defined at MLC placement (~SSD 56), phatom placed at SSD60
		SFF	both Up & Down foil removed					Jaw open 40x40 SSD 100				SF							Jaw open 40x40 SSD 100
		DOSXYZnrc ($Revision:1.50 $) Dose outputs (dose/F, Gy.cm**2)										DOSXYZnrc ($Revision:1.50 $) Dose outputs (dose/F, Gy.cm**2)
		for z= 2.100 to 2.300 k= 13										for z= 2.100 to 2.300 k= 13
		ybounds: -0.250 0.250										ybounds: -0.250 0.250
		j= 29										j= 29
		xbounds ( -14.250)						Xcenter	Dose(%)			xbounds ( -14.250)							Xcenter	Dose(%)
		-13.75	1	1.23e-17	-0.125			-14	0.000858939			-13.75	1	7.609e-18	-0.129				-14	0.0155381
		-13.25	2	1.859e-17	-0.107			-13.5	0.00129818			-13.25	2	8.533e-18	-0.117				-13.5	0.017425
		-12.75	3	1.696e-17	-0.102			-13	0.00118436			-12.75	3	1.053e-17	-0.103				-13	0.021503
		-12.25	4	2.096e-17	-0.096			-12.5	0.00146369			-12.25	4	9.661e-18	-0.105				-12.5	0.0197284
		-11.75	5	2.144e-17	-0.09			-12	0.00149721			-11.75	5	1.236e-17	-0.098				-12	0.0252399
								-0.25	0										-0.25	0
		-11.25	6	3.006e-17	-0.081			-11.5	0.00209916			-11.25	6	1.314e-17	-0.096				-11.5	0.0268328
		-10.75	7	2.981e-17	-0.078			-11	0.0020817			-10.75	7	1.729e-17	-0.088				-11	0.0353073
		-10.25	8	4.259e-17	-0.069			-10.5	0.00297416			-10.25	8	1.514e-17	-0.087				-10.5	0.0309169
		-9.75	9	4.827e-17	-0.065			-10	0.00337081			-9.75	9	1.794e-17	-0.082				-10	0.0366347
		-9.25	10	5.612e-17	-0.059			-9.5	0.00391899			-9.25	10	2.041e-17	-0.074				-9.5	0.0416786
								-0.25	0										-0.25	0
		-8.75	11	6.055e-17	-0.059			-9	0.00422835			-8.75	11	2.448e-17	-0.069				-9	0.0499898
		-8.25	12	6.623e-17	-0.056			-8.5	0.004625			-8.25	12	2.251e-17	-0.073				-8.5	0.0459669
		-7.75	13	8.208e-17	-0.051			-8	0.00573184			-7.75	13	2.442e-17	-0.073				-8	0.0498673
		-7.25	14	9.496e-17	-0.048			-7.5	0.00663128			-7.25	14	2.535e-17	-0.066				-7.5	0.0517664
		-6.75	15	1.103e-16	-0.044			-7	0.00770251			-6.75	15	2.806e-17	-0.065				-7	0.0573004
								-0.25	0										-0.25	0
		-6.25	16	1.612e-16	-0.037			-6.5	0.011257			-6.25	16	3.288e-17	-0.06				-6.5	0.0671431
		-5.75	17	2.372e-16	-0.032			-6	0.0165642			-5.75	17	2.873e-17	-0.061				-6	0.0586686
		-5.25	18	4.461e-16	-0.024			-5.5	0.0311522			-5.25	18	3.966e-17	-0.055				-5.5	0.0809884
		-4.75	19	1.279e-15	-0.015			-5	0.0893156			-4.75	19	5.509e-17	-0.047				-5	0.112497
		-4.25	20	3.403e-15	-0.009			-4.5	0.23764			-4.25	20	1.127e-16	-0.035				-4.5	0.230141
								-0.25	0										-0.25	0
		-3.75	21	7.214e-15	-0.006			-4	0.503771			-3.75	21	2.258e-16	-0.025				-4	0.461099
		-3.25	22	1.245e-14	-0.005			-3.5	0.869413			-3.25	22	4.046e-16	-0.019				-3.5	0.82622
		-2.75	23	2.12e-14	-0.004			-3	1.48045			-2.75	23	6.426e-16	-0.015				-3	1.31223
		-2.25	24	4.891e-14	-0.002			-2.5	3.4155			-2.25	24	1.408e-15	-0.01				-2.5	2.87523
		-1.75	25	1.364e-13	-0.001			-2	9.52514			-1.75	25	4.137e-15	-0.006				-2	8.44803
								-0.25	0										-0.25	0
		-1.25	26	3.476e-13	-0.001			-1.5	24.2737			-1.25	26	1.147e-14	-0.004				-1.5	23.4225
		-0.75	27	7.396e-13	-0.001			-1	51.648			-0.75	27	2.516e-14	-0.002				-1	51.3784
		-0.25	28	1.211e-12	0			-0.5	84.567			-0.25	28	4.144e-14	-0.002				-0.5	84.6232
		0.25	29	1.432e-12	0			0	100			0.25	29	4.897e-14	-0.002				0	100
		0.75	30	1.207e-12	0			0.5	84.2877			0.75	30	4.157e-14	-0.002				0.5	84.8887
								-0.25	0										-0.25	0
		1.25	31	7.362e-13	-0.001			1	51.4106			1.25	31	2.506e-14	-0.002				1	51.1742
		1.75	32	3.466e-13	-0.001			1.5	24.2039			1.75	32	1.158e-14	-0.004				1.5	23.6471
		2.25	33	1.358e-13	-0.001			2	9.48324			2.25	33	4.162e-15	-0.006				2	8.49908
		2.75	34	4.855e-14	-0.002			2.5	3.39036			2.75	34	1.416e-15	-0.01				2.5	2.89157
		3.25	35	2.116e-14	-0.004			3	1.47765			3.25	35	6.666e-16	-0.015				3	1.36124
								-0.25	0										-0.25	0
		3.75	36	1.253e-14	-0.005			3.5	0.875			3.75	36	4.082e-16	-0.019				3.5	0.833572
		4.25	37	7.168e-15	-0.006			4	0.500559			4.25	37	2.344e-16	-0.025				4	0.47866
		4.75	38	3.44e-15	-0.009			4.5	0.240223			4.75	38	1.086e-16	-0.035				4.5	0.221768
		5.25	39	1.298e-15	-0.014			5	0.0906425			5.25	39	5.813e-17	-0.046				5	0.118705
		5.75	40	4.789e-16	-0.023			5.5	0.0334427			5.75	40	3.956e-17	-0.054				5.5	0.0807842
								-0.25	0										-0.25	0
		6.25	41	2.301e-16	-0.031			6	0.0160684			6.25	41	3.423e-17	-0.058				6	0.0698999
		6.75	42	1.483e-16	-0.039			6.5	0.0103561			6.75	42	3.001e-17	-0.062				6.5	0.0612824
		7.25	43	1.21e-16	-0.041			7	0.00844972			7.25	43	2.772e-17	-0.065				7	0.0566061
		7.75	44	9.09e-17	-0.048			7.5	0.00634777			7.75	44	3.325e-17	-0.06				7.5	0.0678987
		8.25	45	7.673e-17	-0.054			8	0.00535824			8.25	45	2.61e-17	-0.066				8	0.0532979
								-0.25	0										-0.25	0
		8.75	46	7.045e-17	-0.054			8.5	0.00491969			8.75	46	2.775e-17	-0.065				8.5	0.0566673
		9.25	47	6.604e-17	-0.057			9	0.00461173			9.25	47	2.174e-17	-0.074				9	0.0443945
		9.75	48	5.355e-17	-0.063			9.5	0.00373953			9.75	48	1.839e-17	-0.079				9.5	0.0375536
		10.25	49	4.028e-17	-0.073			10	0.00281285			10.25	49	2.183e-17	-0.074				10	0.0445783
		10.75	50	4.481e-17	-0.064			10.5	0.00312919			10.75	50	1.617e-17	-0.086				10.5	0.0330202
								-0.25	0										-0.25	0
		11.25	51	3.572e-17	-0.072			11	0.00249441			11.25	51	1.933e-17	-0.08				11	0.0394731
		11.75	52	2.864e-17	-0.084			11.5	0.002			11.75	52	1.488e-17	-0.085				11.5	0.030386
		12.25	53	2.399e-17	-0.093			12	0.00167528			12.25	53	1.435e-17	-0.093				12	0.0293037
		12.75	54	1.875e-17	-0.105			12.5	0.00130936			12.75	54	1.213e-17	-0.097				12.5	0.0247703
		13.25	55	1.941e-17	-0.108			13	0.00135545			13.25	55	1.447e-17	-0.094				13	0.0295487
								-0.25	0										-0.25	0
		13.75	56	1.837e-17	-0.105			13.5	0.00128282			13.75	56	8.432e-18	-0.119				13.5	0.0172187
		14.25	57	1.493e-17	-0.11			14	0.0010426			14.25	57	6.912e-18	-0.124				14	0.0141148

## Sheet: D2.6cm CR
		woCone 1x1 defined at MLC placement (~SSD 56), phatom placed at SSD60										woCone 1x1 defined at MLC placement (~SSD 56), phatom placed at SSD60
		SFF	both Up & Down foil removed					Jaw open 40x40 SSD 100				SF							Jaw open 40x40 SSD 100
		DOSXYZnrc ($Revision:1.50 $) Dose outputs (dose/F, Gy.cm**2)										DOSXYZnrc ($Revision:1.50 $) Dose outputs (dose/F, Gy.cm**2)
		for z= 2.500 to 2.700 k= 15										for z= 2.500 to 2.700 k= 15
		ybounds: -0.250 0.250										ybounds: -0.250 0.250
		j= 29										j= 29
		xbounds ( -14.250)						Xcenter	Dose(%)			xbounds ( -14.250)							Xcenter	Dose(%)
		-13.75	1	1.752e-17	-0.116			-14	0.001871			-13.75	1	5.417e-18	-0.142				-14	0.0204261
		-13.25	2	1.983e-17	-0.111			-13.5	0.00211768			-13.25	2	9.42e-18	-0.11				-13.5	0.0355204
		-12.75	3	2.175e-17	-0.095			-13	0.00232273			-12.75	3	9.681e-18	-0.107				-13	0.0365045
		-12.25	4	1.766e-17	-0.101			-12.5	0.00188595			-12.25	4	1.284e-17	-0.098				-12.5	0.0484163
		-11.75	5	2.524e-17	-0.091			-12	0.00269543			-11.75	5	1.344e-17	-0.096				-12	0.0506787
								-0.25	0										-0.25	0
		-11.25	6	3.196e-17	-0.079			-11.5	0.00341307			-11.25	6	1.41e-17	-0.091				-11.5	0.0531674
		-10.75	7	3.499e-17	-0.079			-11	0.00373665			-10.75	7	1.347e-17	-0.096				-11	0.0507919
		-10.25	8	3.941e-17	-0.071			-10.5	0.00420867			-10.25	8	1.398e-17	-0.089				-10.5	0.0527149
		-9.75	9	4.562e-17	-0.066			-10	0.00487185			-9.75	9	1.864e-17	-0.077				-10	0.0702866
		-9.25	10	5.17e-17	-0.062			-9.5	0.00552114			-9.25	10	2.122e-17	-0.075				-9.5	0.0800151
								-0.25	0										-0.25	0
		-8.75	11	6.466e-17	-0.059			-9	0.00690517			-8.75	11	2.414e-17	-0.071				-9	0.0910256
		-8.25	12	5.954e-17	-0.055			-8.5	0.00635839			-8.25	12	2.061e-17	-0.077				-8.5	0.0777149
		-7.75	13	7.006e-17	-0.053			-8	0.00748185			-7.75	13	2.266e-17	-0.072				-8	0.0854449
		-7.25	14	9.384e-17	-0.047			-7.5	0.0100214			-7.25	14	2.542e-17	-0.067				-7.5	0.0958522
		-6.75	15	9.399e-17	-0.045			-7	0.0100374			-6.75	15	3.027e-17	-0.062				-7	0.11414
								-0.25	0										-0.25	0
		-6.25	16	1.211e-16	-0.042			-6.5	0.0129325			-6.25	16	2.956e-17	-0.062				-6.5	0.111463
		-5.75	17	1.574e-16	-0.037			-6	0.0168091			-5.75	17	3.204e-17	-0.06				-6	0.120814
		-5.25	18	2.426e-16	-0.03			-5.5	0.0259077			-5.25	18	3.26e-17	-0.058				-5.5	0.122926
		-4.75	19	5.616e-16	-0.021			-5	0.0599744			-4.75	19	3.784e-17	-0.056				-5	0.142685
		-4.25	20	1.604e-15	-0.013			-4.5	0.171294			-4.25	20	5.354e-17	-0.047				-4.5	0.201885
								-0.25	0										-0.25	0
		-3.75	21	3.783e-15	-0.008			-4	0.403994			-3.75	21	9.676e-17	-0.037				-4	0.364857
		-3.25	22	6.808e-15	-0.006			-3.5	0.72704			-3.25	22	1.66e-16	-0.029				-3.5	0.625943
		-2.75	23	1.156e-14	-0.005			-3	1.23452			-2.75	23	2.739e-16	-0.022				-3	1.03281
		-2.25	24	2.756e-14	-0.003			-2.5	2.94319			-2.25	24	5.244e-16	-0.016				-2.5	1.97738
		-1.75	25	8.857e-14	-0.002			-2	9.45856			-1.75	25	1.667e-15	-0.009				-2	6.28582
								-0.25	0										-0.25	0
		-1.25	26	2.478e-13	-0.001			-1.5	26.463			-1.25	26	5.374e-15	-0.005				-1.5	20.264
		-0.75	27	5.192e-13	-0.001			-1	55.4464			-0.75	27	1.303e-14	-0.003				-1	49.1327
		-0.25	28	8.077e-13	-0.001			-0.5	86.2559			-0.25	28	2.234e-14	-0.003				-0.5	84.2383
		0.25	29	9.364e-13	-0.001			0	100			0.25	29	2.652e-14	-0.002				0	100
		0.75	30	8.062e-13	-0.001			0.5	86.0957			0.75	30	2.23e-14	-0.003				0.5	84.0875
								-0.25	0										-0.25	0
		1.25	31	5.163e-13	-0.001			1	55.1367			1.25	31	1.3e-14	-0.003				1	49.0196
		1.75	32	2.466e-13	-0.001			1.5	26.3349			1.75	32	5.389e-15	-0.005				1.5	20.3205
		2.25	33	8.854e-14	-0.002			2	9.45536			2.25	33	1.691e-15	-0.009				2	6.37632
		2.75	34	2.726e-14	-0.003			2.5	2.91115			2.75	34	5.239e-16	-0.016				2.5	1.97549
		3.25	35	1.159e-14	-0.005			3	1.23772			3.25	35	2.74e-16	-0.022				3	1.03318
								-0.25	0										-0.25	0
		3.75	36	6.91e-15	-0.006			3.5	0.737933			3.75	36	1.662e-16	-0.029				3.5	0.626697
		4.25	37	3.787e-15	-0.008			4	0.404421			4.25	37	9.535e-17	-0.036				4	0.35954
		4.75	38	1.612e-15	-0.013			4.5	0.172149			4.75	38	5.676e-17	-0.047				4.5	0.214027
		5.25	39	5.738e-16	-0.021			5	0.0612772			5.25	39	3.333e-17	-0.057				5	0.125679
		5.75	40	2.496e-16	-0.03			5.5	0.0266553			5.75	40	3.382e-17	-0.057				5.5	0.127526
								-0.25	0										-0.25	0
		6.25	41	1.778e-16	-0.035			6	0.0189876			6.25	41	3.401e-17	-0.059				6	0.128243
		6.75	42	1.212e-16	-0.04			6.5	0.0129432			6.75	42	2.822e-17	-0.065				6.5	0.10641
		7.25	43	9.677e-17	-0.047			7	0.0103343			7.25	43	2.981e-17	-0.063				7	0.112406
		7.75	44	8.616e-17	-0.049			7.5	0.0092012			7.75	44	2.776e-17	-0.067				7.5	0.104676
		8.25	45	7.946e-17	-0.051			8	0.00848569			8.25	45	2.363e-17	-0.067				8	0.0891026
								-0.25	0										-0.25	0
		8.75	46	7.112e-17	-0.054			8.5	0.00759504			8.75	46	2.335e-17	-0.071				8.5	0.0880468
		9.25	47	6.063e-17	-0.059			9	0.0064748			9.25	47	2.057e-17	-0.078				9	0.0775641
		9.75	48	5.74e-17	-0.06			9.5	0.00612986			9.75	48	2.035e-17	-0.077				9.5	0.0767345
		10.25	49	4.425e-17	-0.066			10	0.00472554			10.25	49	1.832e-17	-0.081				10	0.0690799
		10.75	50	4.577e-17	-0.07			10.5	0.00488787			10.75	50	1.747e-17	-0.079				10.5	0.0658748
								-0.25	0										-0.25	0
		11.25	51	3.948e-17	-0.073			11	0.00421615			11.25	51	1.538e-17	-0.091				11	0.057994
		11.75	52	2.481e-17	-0.084			11.5	0.00264951			11.75	52	1.438e-17	-0.089				11.5	0.0542232
		12.25	53	2.894e-17	-0.085			12	0.00309056			12.25	53	1.172e-17	-0.093				12	0.0441931
		12.75	54	2.221e-17	-0.089			12.5	0.00237185			12.75	54	1.252e-17	-0.098				12.5	0.0472097
		13.25	55	2.409e-17	-0.1			13	0.00257262			13.25	55	1.33e-17	-0.098				13	0.0501508
								-0.25	0										-0.25	0
		13.75	56	1.632e-17	-0.108			13.5	0.00174284			13.75	56	1.108e-17	-0.112				13.5	0.0417798
		14.25	57	1.669e-17	-0.115			14	0.00178236			14.25	57	7.116e-18	-0.131				14	0.0268326
