# Supplementary material for: Monte Carlo simulation for scanning technique with scattering foil free electron beam: A proof of concept study
Source: PLoS One. 2017 May 11;12(5):e0177380. doi: 10.1371/journal.pone.0177380 (PMC5426680; doi:10.1371/journal.pone.0177380)
Supplement: S3 Table — The 6 MeV electron beams with a field size of 2 cm by 2 cm, which were collimated by the multi-leaf collimators are shown with and without scattering foil. (XLSX) [file pone.0177380.s003.xlsx]

## Sheet: PDD
		woCone 2x2 defined at MLC placement (~SSD 56), phatom placed at SSD60										woCone 2x2 defined at MLC placement (~SSD 56), phatom placed at SSD60
		SFF	both Up & Down foil removed					Jaw open 40x40 SSD 100				SF							Jaw open 40x40 SSD 100
		DOSXYZnrc ($Revision:1.50 $) Dose outputs (dose/F, Gy.cm**2)										DOSXYZnrc ($Revision:1.50 $) Dose outputs (dose/F, Gy.cm**2)
		for x= -0.250 to 0.250 i= 29										for x= -0.250 to 0.250 i= 29
		ybounds: -0.250 0.250										ybounds: -0.250 0.250
		j= 29										j= 29
		zbounds ( -0.100)						Depth (cm)	Dose(%)			zbounds ( -0.100)							Depth (cm)	Dose(%)
		0.1	1	4.141e-12	-0.001			0	87.9941			0.1	1	2.497e-13	-0.001				0	86.5511
		0.3	2	4.346e-12	-0.001			0.2	92.3502			0.3	2	2.641e-13	-0.001				0.2	91.5425
		0.5	3	4.463e-12	0			0.4	94.8364			0.5	3	2.729e-13	-0.001				0.4	94.5927
		0.7	4	4.559e-12	0			0.6	96.8763			0.7	4	2.804e-13	-0.001				0.6	97.1924
		0.9	5	4.641e-12	0			0.8	98.6188			0.9	5	2.864e-13	-0.001				0.8	99.2721
								-0.1	0										-0.1	0
		1.1	6	4.692e-12	0			1	99.7025			1.1	6	2.885e-13	-0.001				1	100
		1.2	7	4.706e-12	0			1.1	100			1.2	7	2.877e-13	-0.001				1.1	99.7227
		1.4	8	4.666e-12	0			1.3	99.15			1.4	8	2.817e-13	-0.001				1.3	97.643
		1.6	9	4.544e-12	0			1.5	96.5576			1.6	9	2.681e-13	-0.001				1.5	92.9289
		1.8	10	4.322e-12	0			1.7	91.8402			1.8	10	2.477e-13	-0.001				1.7	85.8579
								-0.1	0										-0.1	0
		2	11	4.011e-12	0			1.9	85.2316			2	11	2.208e-13	-0.001				1.9	76.5338
		2.1	12	3.742e-12	0			2	79.5155			2.1	12	1.988e-13	-0.001				2	68.9081
		2.3	13	3.413e-12	0			2.2	72.5244			2.3	13	1.719e-13	-0.001				2.2	59.5841
		2.5	14	2.928e-12	0			2.4	62.2184			2.5	14	1.325e-13	-0.001				2.4	45.9272
		2.7	15	2.372e-12	-0.001			2.6	50.4037			2.7	15	9.042e-14	-0.001				2.6	31.3414
								-0.1	0										-0.1	0
		3	16	1.582e-12	-0.001			2.9	33.6167			3	16	4.182e-14	-0.002				2.9	14.4957
		3.5	17	4.597e-13	-0.001			3.4	9.76838			3.5	17	5.271e-15	-0.004				3.4	1.82704
		4	18	1.139e-14	-0.004			3.9	0.242031			4	18	1.536e-15	-0.007				3.9	0.532409
		4.4	19	5.431e-15	-0.007			4.3	0.115406			4.4	19	1.43e-15	-0.008				4.3	0.495667
		4.8	20	4.735e-15	-0.008			4.7	0.100616			4.8	20	1.379e-15	-0.008				4.7	0.47799
								-0.1	0										-0.1	0
		5.2	21	4.217e-15	-0.008			5.1	0.089609			5.2	21	1.319e-15	-0.008				5.1	0.457192
		5.6	22	3.848e-15	-0.009			5.5	0.081768			5.6	22	1.241e-15	-0.009				5.5	0.430156
		6	23	3.419e-15	-0.009			5.9	0.0726519			6	23	1.18e-15	-0.009				5.9	0.409012

## Sheet: D1.3cm CR
		woCone 2x2 defined at MLC placement (~SSD 56), phatom placed at SSD60										woCone 2x2 defined at MLC placement (~SSD 56), phatom placed at SSD60
		SFF	both Up & Down foil removed					Jaw open 40x40 SSD 100				SF							Jaw open 40x40 SSD 100
		DOSXYZnrc ($Revision:1.50 $) Dose outputs (dose/F, Gy.cm**2)										DOSXYZnrc ($Revision:1.50 $) Dose outputs (dose/F, Gy.cm**2)
		for z= 1.200 to 1.400 k= 8										for z= 1.200 to 1.400 k= 8
		ybounds: -0.250 0.250										ybounds: -0.250 0.250
		j= 29										j= 29
		xbounds ( -14.250)						Xcenter	Dose(%)			xbounds ( -14.250)							Xcenter	Dose(%)
		-13.75	1	2.901e-17	-0.123			-14	0.000621732			-13.75	1	7.563e-18	-0.138				-14	0.00268477
		-13.25	2	3.762e-17	-0.125			-13.5	0.000806258			-13.25	2	7.806e-18	-0.132				-13.5	0.00277103
		-12.75	3	4.679e-17	-0.11			-13	0.00100279			-12.75	3	1.304e-17	-0.098				-13	0.00462904
		-12.25	4	5.269e-17	-0.095			-12.5	0.00112923			-12.25	4	1.649e-17	-0.095				-12.5	0.00585375
		-11.75	5	5.484e-17	-0.094			-12	0.00117531			-11.75	5	1.366e-17	-0.101				-12	0.00484913
								-0.25	0										-0.25	0
		-11.25	6	8.29e-17	-0.083			-11.5	0.00177668			-11.25	6	1.919e-17	-0.088				-11.5	0.00681221
		-10.75	7	1.002e-16	-0.072			-11	0.00214745			-10.75	7	2.175e-17	-0.083				-11	0.00772098
		-10.25	8	1.277e-16	-0.067			-10.5	0.00273682			-10.25	8	2.435e-17	-0.084				-10.5	0.00864395
		-9.75	9	1.886e-16	-0.056			-10	0.00404201			-9.75	9	2.97e-17	-0.075				-10	0.0105431
		-9.25	10	2.23e-16	-0.05			-9.5	0.00477925			-9.25	10	3.31e-17	-0.071				-9.5	0.0117501
								-0.25	0										-0.25	0
		-8.75	11	3.412e-16	-0.044			-9	0.00731247			-8.75	11	3.47e-17	-0.069				-9	0.0123181
		-8.25	12	4.908e-16	-0.037			-8.5	0.0105186			-8.25	12	4.549e-17	-0.06				-8.5	0.0161484
		-7.75	13	7.157e-16	-0.03			-8	0.0153386			-7.75	13	5.2e-17	-0.057				-8	0.0184594
		-7.25	14	1.22e-15	-0.023			-7.5	0.0261466			-7.25	14	7.349e-17	-0.049				-7.5	0.026088
		-6.75	15	2.456e-15	-0.017			-7	0.0526361			-6.75	15	1.28e-16	-0.039				-7	0.0454384
								-0.25	0										-0.25	0
		-6.25	16	5.197e-15	-0.012			-6.5	0.11138			-6.25	16	2.991e-16	-0.026				-6.5	0.106177
		-5.75	17	1.068e-14	-0.008			-6	0.22889			-5.75	17	6.509e-16	-0.018				-6	0.231061
		-5.25	18	1.997e-14	-0.006			-5.5	0.42799			-5.25	18	1.21e-15	-0.013				-5.5	0.429535
		-4.75	19	3.223e-14	-0.005			-5	0.690742			-4.75	19	1.999e-15	-0.01				-5	0.70962
		-4.25	20	4.298e-14	-0.004			-4.5	0.921132			-4.25	20	2.688e-15	-0.008				-4.5	0.954207
								-0.25	0										-0.25	0
		-3.75	21	5.468e-14	-0.004			-4	1.17188			-3.75	21	3.373e-15	-0.008				-4	1.19737
		-3.25	22	7.7e-14	-0.003			-3.5	1.65024			-3.25	22	4.66e-15	-0.006				-3.5	1.65424
		-2.75	23	1.268e-13	-0.002			-3	2.71753			-2.75	23	7.793e-15	-0.005				-3	2.76642
		-2.25	24	2.39e-13	-0.002			-2.5	5.12216			-2.25	24	1.604e-14	-0.004				-2.5	5.694
		-1.75	25	5.773e-13	-0.001			-2	12.3725			-1.75	25	3.962e-14	-0.002				-2	14.0646
								-0.25	0										-0.25	0
		-1.25	26	1.698e-12	-0.001			-1.5	36.3909			-1.25	26	1.039e-13	-0.001				-1.5	36.8832
		-0.75	27	3.486e-12	0			-1	74.7107			-0.75	27	2.03e-13	-0.001				-1	72.0625
		-0.25	28	4.469e-12	0			-0.5	95.778			-0.25	28	2.663e-13	-0.001				-0.5	94.5332
		0.25	29	4.666e-12	0			0	100			0.25	29	2.817e-13	-0.001				0	100
		0.75	30	4.448e-12	0			0.5	95.3279			0.75	30	2.652e-13	-0.001				0.5	94.1427
								-0.25	0										-0.25	0
		1.25	31	3.458e-12	0			1	74.1106			1.25	31	2.013e-13	-0.001				1	71.459
		1.75	32	1.679e-12	-0.001			1.5	35.9837			1.75	32	1.033e-13	-0.001				1.5	36.6702
		2.25	33	5.711e-13	-0.001			2	12.2396			2.25	33	3.922e-14	-0.002				2	13.9226
		2.75	34	2.382e-13	-0.002			2.5	5.10502			2.75	34	1.61e-14	-0.004				2.5	5.7153
		3.25	35	1.265e-13	-0.002			3	2.7111			3.25	35	7.91e-15	-0.005				3	2.80795
								-0.25	0										-0.25	0
		3.75	36	7.747e-14	-0.003			3.5	1.66031			3.75	36	4.694e-15	-0.006				3.5	1.66631
		4.25	37	5.542e-14	-0.004			4	1.18774			4.25	37	3.419e-15	-0.008				4	1.2137
		4.75	38	4.349e-14	-0.004			4.5	0.932062			4.75	38	2.756e-15	-0.008				4.5	0.978346
		5.25	39	3.28e-14	-0.005			5	0.702958			5.25	39	1.986e-15	-0.01				5	0.705005
		5.75	40	2.071e-14	-0.006			5.5	0.443849			5.75	40	1.218e-15	-0.013				5.5	0.432375
								-0.25	0										-0.25	0
		6.25	41	1.087e-14	-0.008			6	0.232962			6.25	41	6.441e-16	-0.018				6	0.228647
		6.75	42	5.273e-15	-0.012			6.5	0.113009			6.75	42	3.114e-16	-0.025				6.5	0.110543
		7.25	43	2.433e-15	-0.017			7	0.0521432			7.25	43	1.42e-16	-0.036				7	0.0504082
		7.75	44	1.192e-15	-0.024			7.5	0.0255465			7.75	44	8.346e-17	-0.045				7.5	0.0296273
		8.25	45	7.189e-16	-0.03			8	0.0154072			8.25	45	5.466e-17	-0.055				8	0.0194036
								-0.25	0										-0.25	0
		8.75	46	4.741e-16	-0.036			8.5	0.0101607			8.75	46	4.789e-17	-0.059				8.5	0.0170004
		9.25	47	3.18e-16	-0.045			9	0.00681526			9.25	47	3.918e-17	-0.067				9	0.0139084
		9.75	48	2.297e-16	-0.052			9.5	0.00492285			9.75	48	3.038e-17	-0.068				9.5	0.0107845
		10.25	49	1.714e-16	-0.059			10	0.00367338			10.25	49	2.998e-17	-0.075				10	0.0106425
		10.75	50	1.315e-16	-0.065			10.5	0.00281826			10.75	50	2.451e-17	-0.081				10.5	0.00870075
								-0.25	0										-0.25	0
		11.25	51	1.031e-16	-0.075			11	0.0022096			11.25	51	2.347e-17	-0.084				11	0.00833156
		11.75	52	8.726e-17	-0.077			11.5	0.00187012			11.75	52	1.675e-17	-0.095				11.5	0.00594604
		12.25	53	6.722e-17	-0.089			12	0.00144063			12.25	53	1.923e-17	-0.089				12	0.00682641
		12.75	54	5.052e-17	-0.099			12.5	0.00108273			12.75	54	1.362e-17	-0.099				12.5	0.00483493
		13.25	55	4.438e-17	-0.113			13	0.000951136			13.25	55	1.249e-17	-0.108				13	0.00443379
								-0.25	0										-0.25	0
		13.75	56	3.275e-17	-0.11			13.5	0.000701886			13.75	56	8.649e-18	-0.13				13.5	0.00307029
		14.25	57	3.249e-17	-0.129			14	0.000696314			14.25	57	9.427e-18	-0.126				14	0.00334647

## Sheet: D1.7cm CR
		woCone 2x2 defined at MLC placement (~SSD 56), phatom placed at SSD60										woCone 2x2 defined at MLC placement (~SSD 56), phatom placed at SSD60
		SFF	both Up & Down foil removed					Jaw open 40x40 SSD 100				SF							Jaw open 40x40 SSD 100
		DOSXYZnrc ($Revision:1.50 $) Dose outputs (dose/F, Gy.cm**2)										DOSXYZnrc ($Revision:1.50 $) Dose outputs (dose/F, Gy.cm**2)
		for z= 1.600 to 1.800 k= 10										for z= 1.600 to 1.800 k= 10
		ybounds: -0.250 0.250										ybounds: -0.250 0.250
		j= 29										j= 29
		xbounds ( -14.250)						Xcenter	Dose(%)			xbounds ( -14.250)							Xcenter	Dose(%)
		-13.75	1	2.945e-17	-0.12			-14	0.000681398			-13.75	1	9.638e-18	-0.128				-14	0.003891
		-13.25	2	3.345e-17	-0.124			-13.5	0.000773947			-13.25	2	1.021e-17	-0.121				-13.5	0.00412192
		-12.75	3	4.586e-17	-0.111			-13	0.00106108			-12.75	3	1.322e-17	-0.111				-13	0.0053371
		-12.25	4	4.502e-17	-0.102			-12.5	0.00104165			-12.25	4	1.063e-17	-0.11				-12.5	0.00429148
		-11.75	5	5.315e-17	-0.1			-12	0.00122975			-11.75	5	1.737e-17	-0.099				-12	0.00701252
								-0.25	0										-0.25	0
		-11.25	6	7.118e-17	-0.082			-11.5	0.00164692			-11.25	6	1.801e-17	-0.09				-11.5	0.00727089
		-10.75	7	8.546e-17	-0.077			-11	0.00197733			-10.75	7	1.922e-17	-0.088				-11	0.00775939
		-10.25	8	9.948e-17	-0.071			-10.5	0.00230171			-10.25	8	1.893e-17	-0.09				-10.5	0.00764231
		-9.75	9	1.148e-16	-0.068			-10	0.00265618			-9.75	9	2.169e-17	-0.083				-10	0.00875656
		-9.25	10	1.624e-16	-0.06			-9.5	0.00375752			-9.25	10	2.611e-17	-0.076				-9.5	0.010541
								-0.25	0										-0.25	0
		-8.75	11	2.152e-16	-0.051			-9	0.00497918			-8.75	11	2.913e-17	-0.069				-9	0.0117602
		-8.25	12	3.099e-16	-0.044			-8.5	0.00717029			-8.25	12	3.775e-17	-0.063				-8.5	0.0152402
		-7.75	13	4.923e-16	-0.035			-8	0.0113906			-7.75	13	4.301e-17	-0.06				-8	0.0173637
		-7.25	14	8.358e-16	-0.027			-7.5	0.0193383			-7.25	14	5.979e-17	-0.053				-7.5	0.0241381
		-6.75	15	1.796e-15	-0.019			-7	0.0415548			-6.75	15	9.265e-17	-0.043				-7	0.0374041
								-0.25	0										-0.25	0
		-6.25	16	4.344e-15	-0.013			-6.5	0.100509			-6.25	16	2.054e-16	-0.031				-6.5	0.0829229
		-5.75	17	9.393e-15	-0.009			-6	0.21733			-5.75	17	4.582e-16	-0.02				-6	0.184982
		-5.25	18	1.751e-14	-0.006			-5.5	0.405137			-5.25	18	9.312e-16	-0.014				-5.5	0.375939
		-4.75	19	2.714e-14	-0.005			-5	0.62795			-4.75	19	1.501e-15	-0.011				-5	0.605975
		-4.25	20	3.675e-14	-0.004			-4.5	0.850301			-4.25	20	2.091e-15	-0.01				-4.5	0.844166
								-0.25	0										-0.25	0
		-3.75	21	4.902e-14	-0.004			-4	1.1342			-3.75	21	2.72e-15	-0.008				-4	1.0981
		-3.25	22	7.544e-14	-0.003			-3.5	1.74549			-3.25	22	4.044e-15	-0.007				-3.5	1.63262
		-2.75	23	1.454e-13	-0.002			-3	3.36418			-2.75	23	7.815e-15	-0.005				-3	3.15503
		-2.25	24	3.216e-13	-0.001			-2.5	7.441			-2.25	24	1.873e-14	-0.003				-2.5	7.56157
		-1.75	25	7.754e-13	-0.001			-2	17.9408			-1.75	25	4.625e-14	-0.002				-2	18.6718
								-0.25	0										-0.25	0
		-1.25	26	1.802e-12	-0.001			-1.5	41.6937			-1.25	26	1.025e-13	-0.001				-1.5	41.3807
		-0.75	27	3.183e-12	0			-1	73.6465			-0.75	27	1.776e-13	-0.001				-1	71.6996
		-0.25	28	4.074e-12	0			-0.5	94.2619			-0.25	28	2.309e-13	-0.001				-0.5	93.2176
		0.25	29	4.322e-12	0			0	100			0.25	29	2.477e-13	-0.001				0	100
		0.75	30	4.06e-12	0			0.5	93.938			0.75	30	2.302e-13	-0.001				0.5	92.935
								-0.25	0										-0.25	0
		1.25	31	3.161e-12	0			1	73.1374			1.25	31	1.763e-13	-0.001				1	71.1748
		1.75	32	1.787e-12	-0.001			1.5	41.3466			1.75	32	1.017e-13	-0.001				1.5	41.0577
		2.25	33	7.675e-13	-0.001			2	17.758			2.25	33	4.577e-14	-0.002				2	18.478
		2.75	34	3.203e-13	-0.001			2.5	7.41092			2.75	34	1.865e-14	-0.003				2.5	7.52927
		3.25	35	1.45e-13	-0.002			3	3.35493			3.25	35	7.815e-15	-0.005				3	3.15503
								-0.25	0										-0.25	0
		3.75	36	7.553e-14	-0.003			3.5	1.74757			3.75	36	4.028e-15	-0.007				3.5	1.62616
		4.25	37	4.972e-14	-0.004			4	1.15039			4.25	37	2.728e-15	-0.008				4	1.10133
		4.75	38	3.724e-14	-0.004			4.5	0.861638			4.75	38	2.074e-15	-0.01				4.5	0.837303
		5.25	39	2.719e-14	-0.005			5	0.629107			5.25	39	1.503e-15	-0.011				5	0.606782
		5.75	40	1.764e-14	-0.006			5.5	0.408144			5.75	40	9.295e-16	-0.014				5.5	0.375252
								-0.25	0										-0.25	0
		6.25	41	9.608e-15	-0.008			6	0.222304			6.25	41	4.799e-16	-0.02				6	0.193742
		6.75	42	4.403e-15	-0.013			6.5	0.101874			6.75	42	2.26e-16	-0.029				6.5	0.0912394
		7.25	43	1.786e-15	-0.019			7	0.0413235			7.25	43	1.067e-16	-0.041				7	0.0430763
		7.75	44	8.631e-16	-0.027			7.5	0.0199699			7.75	44	5.976e-17	-0.052				7.5	0.024126
		8.25	45	4.887e-16	-0.036			8	0.0113073			8.25	45	4.197e-17	-0.061				8	0.0169439
								-0.25	0										-0.25	0
		8.75	46	3.139e-16	-0.043			8.5	0.00726284			8.75	46	3.331e-17	-0.066				8.5	0.0134477
		9.25	47	2.207e-16	-0.05			9	0.00510643			9.25	47	3.336e-17	-0.066				9	0.0134679
		9.75	48	1.58e-16	-0.059			9.5	0.00365571			9.75	48	2.693e-17	-0.077				9.5	0.010872
		10.25	49	1.249e-16	-0.066			10	0.00288987			10.25	49	2.264e-17	-0.077				10	0.00914009
		10.75	50	9.592e-17	-0.074			10.5	0.00221934			10.75	50	2.223e-17	-0.08				10.5	0.00897457
								-0.25	0										-0.25	0
		11.25	51	8.144e-17	-0.083			11	0.00188431			11.25	51	2.198e-17	-0.08				11	0.00887364
		11.75	52	6.085e-17	-0.09			11.5	0.00140791			11.75	52	1.837e-17	-0.089				11.5	0.00741623
		12.25	53	4.628e-17	-0.105			12	0.0010708			12.25	53	1.761e-17	-0.094				12	0.00710941
		12.75	54	4.083e-17	-0.105			12.5	0.000944702			12.75	54	1.411e-17	-0.1				12.5	0.00569641
		13.25	55	3.395e-17	-0.117			13	0.000785516			13.25	55	1.359e-17	-0.103				13	0.00548648
								-0.25	0										-0.25	0
		13.75	56	2.79e-17	-0.125			13.5	0.000645534			13.75	56	9.412e-18	-0.117				13.5	0.00379976
		14.25	57	2.902e-17	-0.12			14	0.000671448			14.25	57	6.868e-18	-0.136				14	0.00277271

## Sheet: D1.9cm CR
		woCone 2x2 defined at MLC placement (~SSD 56), phatom placed at SSD60										woCone 2x2 defined at MLC placement (~SSD 56), phatom placed at SSD60
		SFF	both Up & Down foil removed					Jaw open 40x40 SSD 100				SF							Jaw open 40x40 SSD 100
		DOSXYZnrc ($Revision:1.50 $) Dose outputs (dose/F, Gy.cm**2)										DOSXYZnrc ($Revision:1.50 $) Dose outputs (dose/F, Gy.cm**2)
		for z= 1.800 to 2.000 k= 11										for z= 1.800 to 2.000 k= 11
		ybounds: -0.250 0.250										ybounds: -0.250 0.250
		j= 29										j= 29
		xbounds ( -14.250)						Xcenter	Dose(%)			xbounds ( -14.250)							Xcenter	Dose(%)
		-13.75	1	3.025e-17	-0.126			-14	0.000754176			-13.75	1	7.696e-18	-0.13				-14	0.00348551
		-13.25	2	3.458e-17	-0.143			-13.5	0.000862129			-13.25	2	1.138e-17	-0.116				-13.5	0.00515399
		-12.75	3	4.021e-17	-0.111			-13	0.00100249			-12.75	3	1.325e-17	-0.103				-13	0.00600091
		-12.25	4	4.511e-17	-0.1			-12.5	0.00112466			-12.25	4	1.363e-17	-0.105				-12.5	0.00617301
		-11.75	5	5.403e-17	-0.091			-12	0.00134705			-11.75	5	1.43e-17	-0.101				-12	0.00647645
								-0.25	0										-0.25	0
		-11.25	6	6.698e-17	-0.093			-11.5	0.00166991			-11.25	6	1.707e-17	-0.093				-11.5	0.00773098
		-10.75	7	6.616e-17	-0.086			-11	0.00164946			-10.75	7	1.759e-17	-0.093				-11	0.00796649
		-10.25	8	8.535e-17	-0.079			-10.5	0.0021279			-10.25	8	1.555e-17	-0.093				-10.5	0.00704257
		-9.75	9	1.126e-16	-0.068			-10	0.00280728			-9.75	9	2.212e-17	-0.081				-10	0.0100181
		-9.25	10	1.41e-16	-0.061			-9.5	0.00351533			-9.25	10	2.256e-17	-0.081				-9.5	0.0102174
								-0.25	0										-0.25	0
		-8.75	11	1.877e-16	-0.055			-9	0.00467963			-8.75	11	2.574e-17	-0.073				-9	0.0116576
		-8.25	12	2.433e-16	-0.048			-8.5	0.00606582			-8.25	12	3.318e-17	-0.067				-8.5	0.0150272
		-7.75	13	3.82e-16	-0.039			-8	0.00952381			-7.75	13	4.215e-17	-0.061				-8	0.0190897
		-7.25	14	6.464e-16	-0.031			-7.5	0.0161157			-7.25	14	5.101e-17	-0.057				-7.5	0.0231024
		-6.75	15	1.408e-15	-0.022			-7	0.0351035			-6.75	15	7.162e-17	-0.048				-7	0.0324366
								-0.25	0										-0.25	0
		-6.25	16	3.501e-15	-0.014			-6.5	0.087285			-6.25	16	1.62e-16	-0.034				-6.5	0.0733696
		-5.75	17	8.102e-15	-0.009			-6	0.201995			-5.75	17	3.639e-16	-0.023				-6	0.16481
		-5.25	18	1.506e-14	-0.007			-5.5	0.375467			-5.25	18	7.291e-16	-0.016				-5.5	0.330208
		-4.75	19	2.33e-14	-0.005			-5	0.580903			-4.75	19	1.172e-15	-0.013				-5	0.530797
		-4.25	20	3.226e-14	-0.005			-4.5	0.804288			-4.25	20	1.665e-15	-0.011				-4.5	0.754076
								-0.25	0										-0.25	0
		-3.75	21	4.39e-14	-0.004			-4	1.09449			-3.75	21	2.254e-15	-0.009				-4	1.02083
		-3.25	22	6.966e-14	-0.003			-3.5	1.73672			-3.25	22	3.451e-15	-0.007				-3.5	1.56295
		-2.75	23	1.451e-13	-0.002			-3	3.61755			-2.75	23	7.034e-15	-0.005				-3	3.18569
		-2.25	24	3.433e-13	-0.001			-2.5	8.55896			-2.25	24	1.786e-14	-0.003				-2.5	8.08877
		-1.75	25	8.169e-13	-0.001			-2	20.3665			-1.75	25	4.443e-14	-0.002				-2	20.1223
								-0.25	0										-0.25	0
		-1.25	26	1.757e-12	-0.001			-1.5	43.8045			-1.25	26	9.446e-14	-0.001				-1.5	42.7808
		-0.75	27	2.945e-12	0			-1	73.4231			-0.75	27	1.581e-13	-0.001				-1	71.6033
		-0.25	28	3.761e-12	0			-0.5	93.7671			-0.25	28	2.049e-13	-0.001				-0.5	92.7989
		0.25	29	4.011e-12	0			0	100			0.25	29	2.208e-13	-0.001				0	100
		0.75	30	3.75e-12	0			0.5	93.4929			0.75	30	2.045e-13	-0.001				0.5	92.6178
								-0.25	0										-0.25	0
		1.25	31	2.926e-12	0			1	72.9494			1.25	31	1.571e-13	-0.001				1	71.1504
		1.75	32	1.742e-12	-0.001			1.5	43.4306			1.75	32	9.371e-14	-0.001				1.5	42.4411
		2.25	33	8.097e-13	-0.001			2	20.187			2.25	33	4.413e-14	-0.002				2	19.9864
		2.75	34	3.416e-13	-0.001			2.5	8.51658			2.75	34	1.784e-14	-0.003				2.5	8.07971
		3.25	35	1.444e-13	-0.002			3	3.6001			3.25	35	6.976e-15	-0.005				3	3.15942
								-0.25	0										-0.25	0
		3.75	36	6.979e-14	-0.003			3.5	1.73997			3.75	36	3.371e-15	-0.007				3.5	1.52672
		4.25	37	4.423e-14	-0.004			4	1.10272			4.25	37	2.264e-15	-0.009				4	1.02536
		4.75	38	3.234e-14	-0.005			4.5	0.806283			4.75	38	1.679e-15	-0.011				4.5	0.760417
		5.25	39	2.346e-14	-0.005			5	0.584892			5.25	39	1.18e-15	-0.013				5	0.53442
		5.75	40	1.523e-14	-0.007			5.5	0.379706			5.75	40	7.22e-16	-0.016				5.5	0.326993
								-0.25	0										-0.25	0
		6.25	41	8.328e-15	-0.009			6	0.207629			6.25	41	3.737e-16	-0.022				6	0.169248
		6.75	42	3.688e-15	-0.014			6.5	0.0919471			6.75	42	1.71e-16	-0.033				6.5	0.0774457
		7.25	43	1.477e-15	-0.021			7	0.0368237			7.25	43	7.588e-17	-0.047				7	0.0343659
		7.75	44	6.796e-16	-0.03			7.5	0.0169434			7.75	44	4.626e-17	-0.058				7.5	0.0209511
		8.25	45	3.804e-16	-0.039			8	0.00948392			8.25	45	3.608e-17	-0.062				8	0.0163406
								-0.25	0										-0.25	0
		8.75	46	2.707e-16	-0.046			8.5	0.00674894			8.75	46	3.063e-17	-0.07				8.5	0.0138723
		9.25	47	1.763e-16	-0.056			9	0.00439541			9.25	47	3.074e-17	-0.07				9	0.0139221
		9.75	48	1.431e-16	-0.06			9.5	0.00356769			9.75	48	2.569e-17	-0.074				9.5	0.011635
		10.25	49	1.189e-16	-0.066			10	0.00296435			10.25	49	2.348e-17	-0.079				10	0.0106341
		10.75	50	8.289e-17	-0.078			10.5	0.00206657			10.75	50	1.837e-17	-0.085				10.5	0.00831975
								-0.25	0										-0.25	0
		11.25	51	7.271e-17	-0.08			11	0.00181276			11.25	51	1.956e-17	-0.087				11	0.0088587
		11.75	52	5.903e-17	-0.093			11.5	0.0014717			11.75	52	1.788e-17	-0.088				11.5	0.00809783
		12.25	53	4.738e-17	-0.1			12	0.00118125			12.25	53	1.445e-17	-0.098				12	0.00654438
		12.75	54	3.97e-17	-0.106			12.5	0.000989778			12.75	54	1.366e-17	-0.108				12.5	0.00618659
		13.25	55	3.044e-17	-0.134			13	0.000758913			13.25	55	1.292e-17	-0.111				13	0.00585145
								-0.25	0										-0.25	0
		13.75	56	3.633e-17	-0.119			13.5	0.000905759			13.75	56	8.097e-18	-0.129				13.5	0.00366712
		14.25	57	3.028e-17	-0.128			14	0.000754924			14.25	57	6.338e-18	-0.144				14	0.00287047

## Sheet: D2.2cm CR
		woCone 2x2 defined at MLC placement (~SSD 56), phatom placed at SSD60										woCone 2x2 defined at MLC placement (~SSD 56), phatom placed at SSD60
		SFF	both Up & Down foil removed					Jaw open 40x40 SSD 100				SF							Jaw open 40x40 SSD 100
		DOSXYZnrc ($Revision:1.50 $) Dose outputs (dose/F, Gy.cm**2)										DOSXYZnrc ($Revision:1.50 $) Dose outputs (dose/F, Gy.cm**2)
		for z= 2.100 to 2.300 k= 13										for z= 2.100 to 2.300 k= 13
		ybounds: -0.250 0.250										ybounds: -0.250 0.250
		j= 29										j= 29
		xbounds ( -14.250)						Xcenter	Dose(%)			xbounds ( -14.250)							Xcenter	Dose(%)
		-13.75	1	3.423e-17	-0.125			-14	0.00100293			-13.75	1	8.481e-18	-0.132				-14	0.00493368
		-13.25	2	3.016e-17	-0.126			-13.5	0.00088368			-13.25	2	1.123e-17	-0.12				-13.5	0.00653287
		-12.75	3	3.532e-17	-0.11			-13	0.00103487			-12.75	3	1.366e-17	-0.102				-13	0.00794648
		-12.25	4	3.748e-17	-0.112			-12.5	0.00109815			-12.25	4	1.293e-17	-0.104				-12.5	0.00752182
		-11.75	5	3.649e-17	-0.101			-12	0.00106915			-11.75	5	1.487e-17	-0.102				-12	0.00865038
								-0.25	0										-0.25	0
		-11.25	6	4.253e-17	-0.103			-11.5	0.00124612			-11.25	6	1.657e-17	-0.092				-11.5	0.00963933
		-10.75	7	5.946e-17	-0.09			-11	0.00174216			-10.75	7	1.976e-17	-0.088				-11	0.0114951
		-10.25	8	7.441e-17	-0.079			-10.5	0.00218019			-10.25	8	1.627e-17	-0.094				-10.5	0.00946481
		-9.75	9	8.655e-17	-0.074			-10	0.00253589			-9.75	9	1.899e-17	-0.081				-10	0.0110471
		-9.25	10	1.031e-16	-0.07			-9.5	0.0030208			-9.25	10	2.368e-17	-0.076				-9.5	0.0137755
								-0.25	0										-0.25	0
		-8.75	11	1.389e-16	-0.06			-9	0.00406973			-8.75	11	2.37e-17	-0.075				-9	0.0137871
		-8.25	12	1.801e-16	-0.056			-8.5	0.00527688			-8.25	12	2.735e-17	-0.069				-8.5	0.0159104
		-7.75	13	2.48e-16	-0.048			-8	0.00726633			-7.75	13	3.334e-17	-0.068				-8	0.019395
		-7.25	14	3.982e-16	-0.038			-7.5	0.0116672			-7.25	14	3.835e-17	-0.064				-7.5	0.0223095
		-6.75	15	8.296e-16	-0.027			-7	0.0243071			-6.75	15	4.907e-17	-0.053				-7	0.0285457
								-0.25	0										-0.25	0
		-6.25	16	2.136e-15	-0.017			-6.5	0.0625842			-6.25	16	8.621e-17	-0.043				-6.5	0.0501513
		-5.75	17	5.36e-15	-0.011			-6	0.157047			-5.75	17	2.057e-16	-0.03				-6	0.119663
		-5.25	18	1.043e-14	-0.008			-5.5	0.305596			-5.25	18	4.192e-16	-0.021				-5.5	0.243863
		-4.75	19	1.653e-14	-0.006			-5	0.484325			-4.75	19	7.089e-16	-0.016				-5	0.412391
		-4.25	20	2.364e-14	-0.005			-4.5	0.692646			-4.25	20	1.05e-15	-0.013				-4.5	0.61082
								-0.25	0										-0.25	0
		-3.75	21	3.34e-14	-0.004			-4	0.978611			-3.75	21	1.464e-15	-0.011				-4	0.851658
		-3.25	22	5.527e-14	-0.003			-3.5	1.6194			-3.25	22	2.336e-15	-0.009				-3.5	1.35893
		-2.75	23	1.264e-13	-0.002			-3	3.70349			-2.75	23	4.97e-15	-0.006				-3	2.89122
		-2.25	24	3.276e-13	-0.001			-2.5	9.59859			-2.25	24	1.367e-14	-0.004				-2.5	7.9523
		-1.75	25	7.803e-13	-0.001			-2	22.8626			-1.75	25	3.559e-14	-0.002				-2	20.7039
								-0.25	0										-0.25	0
		-1.25	26	1.563e-12	-0.001			-1.5	45.7955			-1.25	26	7.432e-14	-0.002				-1.5	43.2344
		-0.75	27	2.497e-12	-0.001			-1	73.1614			-0.75	27	1.219e-13	-0.001				-1	70.9133
		-0.25	28	3.182e-12	0			-0.5	93.2318			-0.25	28	1.586e-13	-0.001				-0.5	92.2629
		0.25	29	3.413e-12	0			0	100			0.25	29	1.719e-13	-0.001				0	100
		0.75	30	3.173e-12	0			0.5	92.9681			0.75	30	1.58e-13	-0.001				0.5	91.9139
								-0.25	0										-0.25	0
		1.25	31	2.482e-12	-0.001			1	72.7219			1.25	31	1.212e-13	-0.001				1	70.5061
		1.75	32	1.553e-12	-0.001			1.5	45.5025			1.75	32	7.375e-14	-0.002				1.5	42.9029
		2.25	33	7.721e-13	-0.001			2	22.6223			2.25	33	3.546e-14	-0.002				2	20.6283
		2.75	34	3.257e-13	-0.001			2.5	9.54292			2.75	34	1.367e-14	-0.004				2.5	7.9523
		3.25	35	1.258e-13	-0.002			3	3.68591			3.25	35	4.908e-15	-0.006				3	2.85515
								-0.25	0										-0.25	0
		3.75	36	5.534e-14	-0.003			3.5	1.62145			3.75	36	2.255e-15	-0.009				3.5	1.31181
		4.25	37	3.367e-14	-0.004			4	0.986522			4.25	37	1.442e-15	-0.011				4	0.83886
		4.75	38	2.398e-14	-0.005			4.5	0.702608			4.75	38	1.054e-15	-0.013				4.5	0.613147
		5.25	39	1.69e-14	-0.006			5	0.495166			5.25	39	7.158e-16	-0.016				5	0.416405
		5.75	40	1.054e-14	-0.008			5.5	0.308819			5.75	40	4.169e-16	-0.021				5.5	0.242525
								-0.25	0										-0.25	0
		6.25	41	5.428e-15	-0.011			6	0.159039			6.25	41	1.952e-16	-0.03				6	0.113554
		6.75	42	2.31e-15	-0.017			6.5	0.0676824			6.75	42	8.985e-17	-0.042				6.5	0.0522688
		7.25	43	9.081e-16	-0.026			7	0.0266071			7.25	43	5.182e-17	-0.054				7	0.0301454
		7.75	44	4.356e-16	-0.037			7.5	0.012763			7.75	44	4.272e-17	-0.059				7.5	0.0248517
		8.25	45	2.696e-16	-0.046			8	0.00789921			8.25	45	4.045e-17	-0.065				8	0.0235311
								-0.25	0										-0.25	0
		8.75	46	1.801e-16	-0.053			8.5	0.00527688			8.75	46	2.955e-17	-0.067				8.5	0.0171902
		9.25	47	1.46e-16	-0.059			9	0.00427776			9.25	47	2.616e-17	-0.076				9	0.0152182
		9.75	48	1.072e-16	-0.068			9.5	0.00314093			9.75	48	2.286e-17	-0.078				9.5	0.0132984
		10.25	49	9.693e-17	-0.071			10	0.00284002			10.25	49	2.473e-17	-0.078				10	0.0143863
		10.75	50	6.643e-17	-0.084			10.5	0.00194638			10.75	50	1.895e-17	-0.089				10.5	0.0110239
								-0.25	0										-0.25	0
		11.25	51	6.407e-17	-0.089			11	0.00187723			11.25	51	1.925e-17	-0.09				11	0.0111984
		11.75	52	5.108e-17	-0.101			11.5	0.00149663			11.75	52	1.638e-17	-0.094				11.5	0.0095288
		12.25	53	4.775e-17	-0.102			12	0.00139906			12.25	53	1.464e-17	-0.102				12	0.00851658
		12.75	54	4.187e-17	-0.104			12.5	0.00122678			12.75	54	1.32e-17	-0.099				12.5	0.00767888
		13.25	55	3.828e-17	-0.113			13	0.00112159			13.25	55	1.203e-17	-0.106				13	0.00699825
								-0.25	0										-0.25	0
		13.75	56	3.356e-17	-0.112			13.5	0.000983299			13.75	56	8.791e-18	-0.123				13.5	0.00511402
		14.25	57	3.014e-17	-0.124			14	0.000883094			14.25	57	6.555e-18	-0.142				14	0.00381326

## Sheet: D2.6cm CR
		woCone 2x2 defined at MLC placement (~SSD 56), phatom placed at SSD60										woCone 2x2 defined at MLC placement (~SSD 56), phatom placed at SSD60
		SFF	both Up & Down foil removed					Jaw open 40x40 SSD 100				SF							Jaw open 40x40 SSD 100
		DOSXYZnrc ($Revision:1.50 $) Dose outputs (dose/F, Gy.cm**2)										DOSXYZnrc ($Revision:1.50 $) Dose outputs (dose/F, Gy.cm**2)
		for z= 2.500 to 2.700 k= 15										for z= 2.500 to 2.700 k= 15
		ybounds: -0.250 0.250										ybounds: -0.250 0.250
		j= 29										j= 29
		xbounds ( -14.250)						Xcenter	Dose(%)			xbounds ( -14.250)							Xcenter	Dose(%)
		-13.75	1	2.736e-17	-0.126			-14	0.00115346			-13.75	1	7.896e-18	-0.131				-14	0.00873258
		-13.25	2	3.104e-17	-0.116			-13.5	0.0013086			-13.25	2	1.053e-17	-0.119				-13.5	0.0116457
		-12.75	3	3.154e-17	-0.112			-13	0.00132968			-12.75	3	1.315e-17	-0.108				-13	0.0145432
		-12.25	4	3.495e-17	-0.106			-12.5	0.00147344			-12.25	4	1.396e-17	-0.104				-12.5	0.0154391
		-11.75	5	5.055e-17	-0.095			-12	0.00213111			-11.75	5	1.452e-17	-0.105				-12	0.0160584
								-0.25	0										-0.25	0
		-11.25	6	5.801e-17	-0.091			-11.5	0.00244562			-11.25	6	1.435e-17	-0.092				-11.5	0.0158704
		-10.75	7	5.73e-17	-0.087			-11	0.00241568			-10.75	7	1.772e-17	-0.088				-11	0.0195974
		-10.25	8	7.727e-17	-0.079			-10.5	0.00325759			-10.25	8	1.59e-17	-0.086				-10.5	0.0175846
		-9.75	9	8.413e-17	-0.07			-10	0.0035468			-9.75	9	1.953e-17	-0.079				-10	0.0215992
		-9.25	10	9.415e-17	-0.07			-9.5	0.00396922			-9.25	10	2.315e-17	-0.079				-9.5	0.0256027
								-0.25	0										-0.25	0
		-8.75	11	1.275e-16	-0.06			-9	0.00537521			-8.75	11	2.426e-17	-0.076				-9	0.0268303
		-8.25	12	1.355e-16	-0.06			-8.5	0.00571248			-8.25	12	2.59e-17	-0.072				-8.5	0.0286441
		-7.75	13	1.6e-16	-0.055			-8	0.00674536			-7.75	13	2.731e-17	-0.071				-8	0.0302035
		-7.25	14	2.279e-16	-0.046			-7.5	0.00960793			-7.25	14	3.247e-17	-0.066				-7.5	0.0359102
		-6.75	15	3.886e-16	-0.037			-7	0.0163828			-6.75	15	3.632e-17	-0.059				-7	0.0401681
								-0.25	0										-0.25	0
		-6.25	16	8.205e-16	-0.027			-6.5	0.0345911			-6.25	16	4.713e-17	-0.053				-6.5	0.0521234
		-5.75	17	2.032e-15	-0.018			-6	0.0856661			-5.75	17	6.967e-17	-0.045				-6	0.0770515
		-5.25	18	4.318e-15	-0.012			-5.5	0.18204			-5.25	18	1.342e-16	-0.035				-5.5	0.148418
		-4.75	19	7.497e-15	-0.009			-5	0.316062			-4.75	19	2.202e-16	-0.027				-5	0.24353
		-4.25	20	1.183e-14	-0.007			-4.5	0.498735			-4.25	20	3.529e-16	-0.022				-4.5	0.39029
								-0.25	0										-0.25	0
		-3.75	21	1.711e-14	-0.006			-4	0.721332			-3.75	21	5.055e-16	-0.019				-4	0.559058
		-3.25	22	2.864e-14	-0.005			-3.5	1.20742			-3.25	22	7.95e-16	-0.015				-3.5	0.87923
		-2.75	23	7.016e-14	-0.003			-3	2.95784			-2.75	23	1.73e-15	-0.01				-3	1.91329
		-2.25	24	2.12e-13	-0.002			-2.5	8.93761			-2.25	24	5.408e-15	-0.006				-2.5	5.98098
		-1.75	25	5.414e-13	-0.001			-2	22.8246			-1.75	25	1.634e-14	-0.003				-2	18.0712
								-0.25	0										-0.25	0
		-1.25	26	1.082e-12	-0.001			-1.5	45.6155			-1.25	26	3.682e-14	-0.002				-1.5	40.7211
		-0.75	27	1.709e-12	-0.001			-1	72.0489			-0.75	27	6.291e-14	-0.002				-1	69.5753
		-0.25	28	2.195e-12	-0.001			-0.5	92.5379			-0.25	28	8.319e-14	-0.002				-0.5	92.004
		0.25	29	2.372e-12	-0.001			0	100			0.25	29	9.042e-14	-0.001				0	100
		0.75	30	2.189e-12	-0.001			0.5	92.285			0.75	30	8.287e-14	-0.002				0.5	91.6501
								-0.25	0										-0.25	0
		1.25	31	1.698e-12	-0.001			1	71.5852			1.25	31	6.256e-14	-0.002				1	69.1882
		1.75	32	1.072e-12	-0.001			1.5	45.1939			1.75	32	3.685e-14	-0.002				1.5	40.7543
		2.25	33	5.361e-13	-0.001			2	22.6012			2.25	33	1.626e-14	-0.003				2	17.9827
		2.75	34	2.102e-13	-0.002			2.5	8.86172			2.75	34	5.418e-15	-0.006				2.5	5.99204
		3.25	35	7.018e-14	-0.003			3	2.95868			3.25	35	1.704e-15	-0.01				3	1.88454
								-0.25	0										-0.25	0
		3.75	36	2.892e-14	-0.005			3.5	1.21922			3.75	36	8.126e-16	-0.015				3.5	0.898695
		4.25	37	1.731e-14	-0.006			4	0.729764			4.25	37	5.119e-16	-0.018				4	0.566136
		4.75	38	1.161e-14	-0.007			4.5	0.48946			4.75	38	3.474e-16	-0.022				4.5	0.384207
		5.25	39	7.683e-15	-0.009			5	0.323904			5.25	39	2.363e-16	-0.027				5	0.261336
		5.75	40	4.384e-15	-0.012			5.5	0.184823			5.75	40	1.29e-16	-0.034				5.5	0.142668
								-0.25	0										-0.25	0
		6.25	41	2.102e-15	-0.017			6	0.0886172			6.25	41	6.977e-17	-0.046				6	0.0771621
		6.75	42	8.365e-16	-0.026			6.5	0.0352656			6.75	42	4.473e-17	-0.054				6.5	0.0494691
		7.25	43	3.897e-16	-0.036			7	0.0164292			7.25	43	4.056e-17	-0.057				7	0.0448573
		7.75	44	2.343e-16	-0.045			7.5	0.00987774			7.75	44	3.489e-17	-0.063				7.5	0.0385866
		8.25	45	1.849e-16	-0.05			8	0.00779511			8.25	45	2.77e-17	-0.07				8	0.0306348
								-0.25	0										-0.25	0
		8.75	46	1.293e-16	-0.057			8.5	0.0054511			8.75	46	2.997e-17	-0.073				8.5	0.0331453
		9.25	47	1.139e-16	-0.067			9	0.00480185			9.25	47	2.276e-17	-0.078				9	0.0251714
		9.75	48	9.827e-17	-0.066			9.5	0.00414292			9.75	48	1.978e-17	-0.081				9.5	0.0218757
		10.25	49	8.544e-17	-0.07			10	0.00360202			10.25	49	2.201e-17	-0.083				10	0.024342
		10.75	50	7.345e-17	-0.079			10.5	0.00309654			10.75	50	2.095e-17	-0.088				10.5	0.0231697
								-0.25	0										-0.25	0
		11.25	51	5.545e-17	-0.094			11	0.00233769			11.25	51	1.517e-17	-0.092				11	0.0167773
		11.75	52	4.597e-17	-0.088			11.5	0.00193803			11.75	52	1.488e-17	-0.098				11.5	0.0164565
		12.25	53	4.584e-17	-0.096			12	0.00193255			12.25	53	1.45e-17	-0.098				12	0.0160363
		12.75	54	3.937e-17	-0.107			12.5	0.00165978			12.75	54	1.58e-17	-0.098				12.5	0.017474
		13.25	55	3.048e-17	-0.129			13	0.00128499			13.25	55	1.009e-17	-0.109				13	0.011159
								-0.25	0										-0.25	0
		13.75	56	2.995e-17	-0.127			13.5	0.00126265			13.75	56	1.009e-17	-0.117				13.5	0.011159
		14.25	57	2.775e-17	-0.125			14	0.0011699			14.25	57	8.634e-18	-0.138				14	0.00954877
