# Supplementary material for: Monte Carlo simulation for scanning technique with scattering foil free electron beam: A proof of concept study
Source: PLoS One. 2017 May 11;12(5):e0177380. doi: 10.1371/journal.pone.0177380 (PMC5426680; doi:10.1371/journal.pone.0177380)
Supplement: S4 Table — The 6 MeV electron beams with a field size of 4 cm by 4 cm, which were collimated by the multi-leaf collimators are shown with and without scattering foil. (XLSX) [file pone.0177380.s004.xlsx]

## Sheet: PDD
		woCone 4x4 defined at MLC placement (~SSD 56), phatom placed at SSD60										woCone 4x4 defined at MLC placement (~SSD 56), phatom placed at SSD60
		SFF	both Up & Down foil removed					Jaw open 40x40 SSD 100				SF							Jaw open 40x40 SSD 100
		DOSXYZnrc ($Revision:1.50 $) Dose outputs (dose/F, Gy.cm**2)										DOSXYZnrc ($Revision:1.50 $) Dose outputs (dose/F, Gy.cm**2)
		for x= -0.250 to 0.250 i= 29										for x= -0.250 to 0.250 i= 29
		ybounds: -0.250 0.250										ybounds: -0.250 0.250
		j= 29										j= 29
		zbounds ( -0.100)						Depth (cm)	Dose(%)			zbounds ( -0.100)							Depth (cm)	Dose(%)
		0.1	1	4.237e-12	-0.001			0	79.7778			0.1	1	2.713e-13	-0.001				0	77.1835
		0.3	2	4.461e-12	-0.001			0.2	83.9955			0.3	2	2.877e-13	-0.001				0.2	81.8492
		0.5	3	4.609e-12	-0.001			0.4	86.7822			0.5	3	2.998e-13	-0.001				0.4	85.2916
		0.7	4	4.744e-12	-0.001			0.6	89.324			0.7	4	3.123e-13	-0.001				0.6	88.8478
		0.9	5	4.893e-12	-0.001			0.8	92.1295			0.9	5	3.256e-13	-0.001				0.8	92.6316
								-0.1	0										-0.1	0
		1.1	6	5.04e-12	-0.001			1	94.8974			1.1	6	3.382e-13	-0.001				1	96.2162
		1.2	7	5.157e-12	-0.001			1.1	97.1004			1.2	7	3.478e-13	-0.001				1.1	98.9474
		1.4	8	5.241e-12	-0.001			1.3	98.682			1.4	8	3.515e-13	-0.001				1.3	100
		1.6	9	5.311e-12	-0.001			1.5	100			1.6	9	3.498e-13	-0.001				1.5	99.5164
		1.8	10	5.267e-12	-0.001			1.7	99.1715			1.8	10	3.359e-13	-0.001				1.7	95.5619
								-0.1	0										-0.1	0
		2	11	5.084e-12	-0.001			1.9	95.7259			2	11	3.085e-13	-0.001				1.9	87.7667
		2.1	12	4.876e-12	-0.001			2	91.8095			2.1	12	2.808e-13	-0.001				2	79.8862
		2.3	13	4.506e-12	-0.001			2.2	84.8428			2.3	13	2.415e-13	-0.001				2.2	68.7055
		2.5	14	3.885e-12	-0.001			2.4	73.1501			2.5	14	1.824e-13	-0.001				2.4	51.8919
		2.7	15	3.104e-12	-0.001			2.6	58.4447			2.7	15	1.192e-13	-0.002				2.6	33.9118
								-0.1	0										-0.1	0
		3	16	1.982e-12	-0.001			2.9	37.3188			3	16	5.127e-14	-0.002				2.9	14.5861
		3.5	17	5.269e-13	-0.002			3.4	9.92092			3.5	17	5.915e-15	-0.005				3.4	1.68279
		4	18	1.484e-14	-0.007			3.9	0.27942			4	18	1.82e-15	-0.008				3.9	0.517781
		4.4	19	8.582e-15	-0.011			4.3	0.161589			4.4	19	1.696e-15	-0.009				4.3	0.482504
		4.8	20	7.847e-15	-0.011			4.7	0.14775			4.8	20	1.627e-15	-0.01				4.7	0.462873
								-0.1	0										-0.1	0
		5.2	21	7.249e-15	-0.012			5.1	0.13649			5.2	21	1.521e-15	-0.01				5.1	0.432717
		5.6	22	6.634e-15	-0.013			5.5	0.124911			5.6	22	1.467e-15	-0.01				5.5	0.417354
		6	23	5.912e-15	-0.013			5.9	0.111316			6	23	1.385e-15	-0.011				5.9	0.394026

## Sheet: D1.3cm CR
		woCone 4x4 defined at MLC placement (~SSD 56), phatom placed at SSD60										woCone 4x4 defined at MLC placement (~SSD 56), phatom placed at SSD60
		SFF	both Up & Down foil removed					Jaw open 40x40 SSD 100				SF							Jaw open 40x40 SSD 100
		DOSXYZnrc ($Revision:1.50 $) Dose outputs (dose/F, Gy.cm**2)										DOSXYZnrc ($Revision:1.50 $) Dose outputs (dose/F, Gy.cm**2)
		for z= 1.200 to 1.400 k= 8										for z= 1.200 to 1.400 k= 8
		ybounds: -0.250 0.250										ybounds: -0.250 0.250
		j= 29										j= 29
		xbounds ( -14.250)						Xcenter	Dose(%)			xbounds ( -14.250)							Xcenter	Dose(%)
		-13.75	1	1.641e-16	-0.115			-14	0.00313108			-13.75	1	2.028e-17	-0.117				-14	0.00576956
		-13.25	2	2.371e-16	-0.102			-13.5	0.00452395			-13.25	2	1.946e-17	-0.118				-13.5	0.00553627
		-12.75	3	2.726e-16	-0.09			-13	0.0052013			-12.75	3	3.104e-17	-0.094				-13	0.00883073
		-12.25	4	3.885e-16	-0.076			-12.5	0.00741271			-12.25	4	3.107e-17	-0.091				-12.5	0.00883926
		-11.75	5	4.959e-16	-0.067			-12	0.00946193			-11.75	5	3.876e-17	-0.082				-12	0.011027
								-0.25	0										-0.25	0
		-11.25	6	6.876e-16	-0.06			-11.5	0.0131196			-11.25	6	4.808e-17	-0.08				-11.5	0.0136785
		-10.75	7	9.533e-16	-0.051			-11	0.0181893			-10.75	7	6.955e-17	-0.063				-11	0.0197866
		-10.25	8	1.672e-15	-0.039			-10.5	0.0319023			-10.25	8	1.117e-16	-0.054				-10.5	0.0317781
		-9.75	9	2.635e-15	-0.031			-10	0.0502767			-9.75	9	1.648e-16	-0.045				-10	0.0468848
		-9.25	10	4.748e-15	-0.024			-9.5	0.0905934			-9.25	10	3.039e-16	-0.033				-9.5	0.086458
								-0.25	0										-0.25	0
		-8.75	11	8.478e-15	-0.018			-9	0.161763			-8.75	11	6.014e-16	-0.024				-9	0.171095
		-8.25	12	1.362e-14	-0.014			-8.5	0.259874			-8.25	12	1.049e-15	-0.018				-8.5	0.298435
		-7.75	13	2.057e-14	-0.011			-8	0.392482			-7.75	13	1.596e-15	-0.015				-8	0.454054
		-7.25	14	2.806e-14	-0.01			-7.5	0.535394			-7.25	14	2.243e-15	-0.012				-7.5	0.638122
		-6.75	15	3.558e-14	-0.009			-7	0.678878			-6.75	15	2.917e-15	-0.011				-7	0.829872
								-0.25	0										-0.25	0
		-6.25	16	4.636e-14	-0.008			-6.5	0.884564			-6.25	16	3.64e-15	-0.01				-6.5	1.03556
		-5.75	17	5.984e-14	-0.007			-6	1.14177			-5.75	17	4.748e-15	-0.009				-6	1.35078
		-5.25	18	7.854e-14	-0.006			-5.5	1.49857			-5.25	18	6.053e-15	-0.008				-5.5	1.72205
		-4.75	19	1.081e-13	-0.005			-5	2.06258			-4.75	19	8.171e-15	-0.007				-5	2.32461
		-4.25	20	1.621e-13	-0.004			-4.5	3.09292			-4.25	20	1.191e-14	-0.005				-4.5	3.38834
								-0.25	0										-0.25	0
		-3.75	21	2.633e-13	-0.003			-4	5.02385			-3.75	21	1.981e-14	-0.004				-4	5.63585
		-3.25	22	4.772e-13	-0.002			-3.5	9.10513			-3.25	22	3.775e-14	-0.003				-3.5	10.7397
		-2.75	23	1.106e-12	-0.002			-3	21.1028			-2.75	23	8.296e-14	-0.002				-3	23.6017
		-2.25	24	2.571e-12	-0.001			-2.5	49.0555			-2.25	24	1.785e-13	-0.001				-2.5	50.7824
		-1.75	25	3.974e-12	-0.001			-2	75.8252			-1.75	25	2.796e-13	-0.001				-2	79.5448
								-0.25	0										-0.25	0
		-1.25	26	4.649e-12	-0.001			-1.5	88.7044			-1.25	26	3.294e-13	-0.001				-1.5	93.7127
		-0.75	27	4.997e-12	-0.001			-1	95.3444			-0.75	27	3.461e-13	-0.001				-1	98.4637
		-0.25	28	5.182e-12	-0.001			-0.5	98.8743			-0.25	28	3.505e-13	-0.001				-0.5	99.7155
		0.25	29	5.241e-12	-0.001			0	100			0.25	29	3.515e-13	-0.001				0	100
		0.75	30	5.155e-12	-0.001			0.5	98.3591			0.75	30	3.493e-13	-0.001				0.5	99.3741
								-0.25	0										-0.25	0
		1.25	31	4.946e-12	-0.001			1	94.3713			1.25	31	3.432e-13	-0.001				1	97.6387
		1.75	32	4.588e-12	-0.001			1.5	87.5405			1.75	32	3.277e-13	-0.001				1.5	93.229
		2.25	33	3.908e-12	-0.001			2	74.5659			2.25	33	2.79e-13	-0.001				2	79.3741
		2.75	34	2.525e-12	-0.001			2.5	48.1778			2.75	34	1.781e-13	-0.001				2.5	50.6686
		3.25	35	1.084e-12	-0.002			3	20.6831			3.25	35	8.277e-14	-0.002				3	23.5477
								-0.25	0										-0.25	0
		3.75	36	4.716e-13	-0.002			3.5	8.99828			3.75	36	3.749e-14	-0.003				3.5	10.6657
		4.25	37	2.601e-13	-0.003			4	4.96279			4.25	37	1.974e-14	-0.004				4	5.61593
		4.75	38	1.611e-13	-0.004			4.5	3.07384			4.75	38	1.19e-14	-0.005				4.5	3.38549
		5.25	39	1.079e-13	-0.005			5	2.05877			5.25	39	8.118e-15	-0.007				5	2.30953
		5.75	40	7.916e-14	-0.006			5.5	1.5104			5.75	40	6.086e-15	-0.008				5.5	1.73144
								-0.25	0										-0.25	0
		6.25	41	6e-14	-0.007			6	1.14482			6.25	41	4.748e-15	-0.009				6	1.35078
		6.75	42	4.612e-14	-0.008			6.5	0.879985			6.75	42	3.704e-15	-0.01				6.5	1.05377
		7.25	43	3.571e-14	-0.009			7	0.681359			7.25	43	2.889e-15	-0.011				7	0.821906
		7.75	44	2.793e-14	-0.01			7.5	0.532914			7.75	44	2.226e-15	-0.013				7.5	0.633286
		8.25	45	2.071e-14	-0.011			8	0.395154			8.25	45	1.574e-15	-0.015				8	0.447795
								-0.25	0										-0.25	0
		8.75	46	1.374e-14	-0.014			8.5	0.262164			8.75	46	1.042e-15	-0.019				8.5	0.296444
		9.25	47	8.459e-15	-0.018			9	0.1614			9.25	47	5.992e-16	-0.024				9	0.170469
		9.75	48	4.73e-15	-0.024			9.5	0.09025			9.75	48	3.247e-16	-0.032				9.5	0.0923755
		10.25	49	2.712e-15	-0.031			10	0.0517459			10.25	49	1.598e-16	-0.045				10	0.0454623
		10.75	50	1.728e-15	-0.04			10.5	0.0329708			10.75	50	1.051e-16	-0.053				10.5	0.0299004
								-0.25	0										-0.25	0
		11.25	51	1.11e-15	-0.049			11	0.0211792			11.25	51	7.682e-17	-0.064				11	0.0218549
		11.75	52	7.045e-16	-0.059			11.5	0.0134421			11.75	52	5.895e-17	-0.069				11.5	0.016771
		12.25	53	4.742e-16	-0.071			12	0.00904789			12.25	53	3.826e-17	-0.082				12	0.0108848
		12.75	54	3.945e-16	-0.079			12.5	0.00752719			12.75	54	2.963e-17	-0.1				12.5	0.00842959
		13.25	55	2.84e-16	-0.09			13	0.00541881			13.25	55	2.187e-17	-0.113				13	0.00622191
								-0.25	0										-0.25	0
		13.75	56	1.943e-16	-0.101			13.5	0.00370731			13.75	56	1.774e-17	-0.124				13.5	0.00504694
		14.25	57	1.584e-16	-0.112			14	0.00302232			14.25	57	1.666e-17	-0.132				14	0.00473969

## Sheet: D1.7cm CR
		woCone 4x4 defined at MLC placement (~SSD 56), phatom placed at SSD60										woCone 4x4 defined at MLC placement (~SSD 56), phatom placed at SSD60
		SFF	both Up & Down foil removed					Jaw open 40x40 SSD 100				SF							Jaw open 40x40 SSD 100
		DOSXYZnrc ($Revision:1.50 $) Dose outputs (dose/F, Gy.cm**2)										DOSXYZnrc ($Revision:1.50 $) Dose outputs (dose/F, Gy.cm**2)
		for z= 1.600 to 1.800 k= 10										for z= 1.600 to 1.800 k= 10
		ybounds: -0.250 0.250										ybounds: -0.250 0.250
		j= 29										j= 29
		xbounds ( -14.250)						Xcenter	Dose(%)			xbounds ( -14.250)							Xcenter	Dose(%)
		-13.75	1	8.579e-17	-0.14			-14	0.00162882			-13.75	1	1.498e-17	-0.127				-14	0.00445966
		-13.25	2	1.234e-16	-0.125			-13.5	0.00234289			-13.25	2	1.88e-17	-0.122				-13.5	0.0055969
		-12.75	3	1.551e-16	-0.108			-13	0.00294475			-12.75	3	2.125e-17	-0.104				-13	0.00632629
		-12.25	4	2.177e-16	-0.092			-12.5	0.00413328			-12.25	4	2.369e-17	-0.097				-12.5	0.00705269
		-11.75	5	2.995e-16	-0.079			-12	0.00568635			-11.75	5	2.629e-17	-0.097				-12	0.00782673
								-0.25	0										-0.25	0
		-11.25	6	4.438e-16	-0.071			-11.5	0.00842605			-11.25	6	3.159e-17	-0.089				-11.5	0.00940458
		-10.75	7	6.035e-16	-0.062			-11	0.0114581			-10.75	7	4.686e-17	-0.08				-11	0.0139506
		-10.25	8	9.448e-16	-0.05			-10.5	0.0179381			-10.25	8	6.198e-17	-0.068				-10.5	0.0184519
		-9.75	9	1.584e-15	-0.039			-10	0.030074			-9.75	9	1.001e-16	-0.053				-10	0.0298005
		-9.25	10	2.878e-15	-0.03			-9.5	0.0546421			-9.25	10	1.806e-16	-0.043				-9.5	0.053766
								-0.25	0										-0.25	0
		-8.75	11	5.527e-15	-0.022			-9	0.104936			-8.75	11	3.503e-16	-0.031				-9	0.104287
		-8.25	12	9.259e-15	-0.017			-8.5	0.175793			-8.25	12	6.277e-16	-0.023				-8.5	0.186871
		-7.75	13	1.421e-14	-0.013			-8	0.269793			-7.75	13	9.559e-16	-0.019				-8	0.284579
		-7.25	14	1.962e-14	-0.011			-7.5	0.372508			-7.25	14	1.356e-15	-0.016				-7.5	0.403692
		-6.75	15	2.591e-14	-0.01			-7	0.491931			-6.75	15	1.853e-15	-0.013				-7	0.551652
								-0.25	0										-0.25	0
		-6.25	16	3.498e-14	-0.009			-6.5	0.664135			-6.25	16	2.469e-15	-0.012				-6.5	0.73504
		-5.75	17	4.763e-14	-0.007			-6	0.90431			-5.75	17	3.289e-15	-0.01				-6	0.97916
		-5.25	18	6.503e-14	-0.006			-5.5	1.23467			-5.25	18	4.414e-15	-0.009				-5.5	1.31408
		-4.75	19	9.448e-14	-0.005			-5	1.79381			-4.75	19	6.192e-15	-0.007				-5	1.84341
		-4.25	20	1.542e-13	-0.004			-4.5	2.92766			-4.25	20	9.947e-15	-0.006				-4.5	2.9613
								-0.25	0										-0.25	0
		-3.75	21	2.98e-13	-0.003			-4	5.65787			-3.75	21	1.924e-14	-0.004				-4	5.7279
		-3.25	22	6.219e-13	-0.002			-3.5	11.8075			-3.25	22	4.196e-14	-0.003				-3.5	12.4918
		-2.75	23	1.356e-12	-0.001			-3	25.7452			-2.75	23	9.057e-14	-0.002				-3	26.9634
		-2.25	24	2.619e-12	-0.001			-2.5	49.7247			-2.25	24	1.721e-13	-0.001				-2.5	51.2355
		-1.75	25	3.848e-12	-0.001			-2	73.0587			-1.75	25	2.555e-13	-0.001				-2	76.0643
								-0.25	0										-0.25	0
		-1.25	26	4.592e-12	-0.001			-1.5	87.1844			-1.25	26	3.061e-13	-0.001				-1.5	91.1283
		-0.75	27	5e-12	-0.001			-1	94.9307			-0.75	27	3.28e-13	-0.001				-1	97.6481
		-0.25	28	5.21e-12	-0.001			-0.5	98.9178			-0.25	28	3.352e-13	-0.001				-0.5	99.7916
		0.25	29	5.267e-12	-0.001			0	100			0.25	29	3.359e-13	-0.001				0	100
		0.75	30	5.183e-12	-0.001			0.5	98.4052			0.75	30	3.339e-13	-0.001				0.5	99.4046
								-0.25	0										-0.25	0
		1.25	31	4.949e-12	-0.001			1	93.9624			1.25	31	3.259e-13	-0.001				1	97.0229
		1.75	32	4.535e-12	-0.001			1.5	86.1021			1.75	32	3.047e-13	-0.001				1.5	90.7115
		2.25	33	3.791e-12	-0.001			2	71.9765			2.25	33	2.542e-13	-0.001				2	75.6773
		2.75	34	2.58e-12	-0.001			2.5	48.9842			2.75	34	1.719e-13	-0.001				2.5	51.1759
		3.25	35	1.33e-12	-0.001			3	25.2516			3.25	35	9.056e-14	-0.002				3	26.9604
								-0.25	0										-0.25	0
		3.75	36	6.134e-13	-0.002			3.5	11.6461			3.75	36	4.151e-14	-0.003				3.5	12.3578
		4.25	37	2.943e-13	-0.003			4	5.58762			4.25	37	1.893e-14	-0.004				4	5.63561
		4.75	38	1.549e-13	-0.004			4.5	2.94095			4.75	38	9.896e-15	-0.006				4.5	2.94611
		5.25	39	9.478e-14	-0.005			5	1.79951			5.25	39	6.276e-15	-0.007				5	1.86841
		5.75	40	6.496e-14	-0.006			5.5	1.23334			5.75	40	4.493e-15	-0.009				5.5	1.3376
								-0.25	0										-0.25	0
		6.25	41	4.784e-14	-0.007			6	0.908297			6.25	41	3.25e-15	-0.01				6	0.96755
		6.75	42	3.537e-14	-0.009			6.5	0.67154			6.75	42	2.492e-15	-0.012				6.5	0.741887
		7.25	43	2.59e-14	-0.01			7	0.491741			7.25	43	1.817e-15	-0.014				7	0.540935
		7.75	44	1.993e-14	-0.011			7.5	0.378394			7.75	44	1.338e-15	-0.016				7.5	0.398333
		8.25	45	1.436e-14	-0.013			8	0.272641			8.25	45	9.233e-16	-0.019				8	0.274873
								-0.25	0										-0.25	0
		8.75	46	9.494e-15	-0.016			8.5	0.180254			8.75	46	6.081e-16	-0.023				8.5	0.181036
		9.25	47	5.554e-15	-0.021			9	0.105449			9.25	47	3.174e-16	-0.032				9	0.0944924
		9.75	48	2.979e-15	-0.029			9.5	0.0565597			9.75	48	1.628e-16	-0.043				9.5	0.0484668
		10.25	49	1.647e-15	-0.039			10	0.0312702			10.25	49	1.015e-16	-0.054				10	0.0302173
		10.75	50	1.042e-15	-0.049			10.5	0.0197836			10.75	50	6.491e-17	-0.065				10.5	0.0193242
								-0.25	0										-0.25	0
		11.25	51	5.985e-16	-0.061			11	0.0113632			11.25	51	4.726e-17	-0.078				11	0.0140697
		11.75	52	4.54e-16	-0.069			11.5	0.00861971			11.75	52	3.637e-17	-0.085				11.5	0.0108276
		12.25	53	2.932e-16	-0.086			12	0.00556674			12.25	53	3.374e-17	-0.094				12	0.0100447
		12.75	54	2.282e-16	-0.097			12.5	0.00433264			12.75	54	2.189e-17	-0.108				12.5	0.00651682
		13.25	55	1.768e-16	-0.108			13	0.00335675			13.25	55	2.023e-17	-0.118				13	0.00602263
								-0.25	0										-0.25	0
		13.75	56	1.44e-16	-0.116			13.5	0.002734			13.75	56	1.407e-17	-0.131				13.5	0.00418875
		14.25	57	9.946e-17	-0.132			14	0.00188836			14.25	57	1.345e-17	-0.134				14	0.00400417

## Sheet: D1.9cm CR
		woCone 4x4 defined at MLC placement (~SSD 56), phatom placed at SSD60										woCone 4x4 defined at MLC placement (~SSD 56), phatom placed at SSD60
		SFF	both Up & Down foil removed					Jaw open 40x40 SSD 100				SF							Jaw open 40x40 SSD 100
		DOSXYZnrc ($Revision:1.50 $) Dose outputs (dose/F, Gy.cm**2)										DOSXYZnrc ($Revision:1.50 $) Dose outputs (dose/F, Gy.cm**2)
		for z= 1.800 to 2.000 k= 11										for z= 1.800 to 2.000 k= 11
		ybounds: -0.250 0.250										ybounds: -0.250 0.250
		j= 29										j= 29
		xbounds ( -14.250)						Xcenter	Dose(%)			xbounds ( -14.250)							Xcenter	Dose(%)
		-13.75	1	6.471e-17	-0.166			-14	0.00127282			-13.75	1	1.188e-17	-0.146				-14	0.00385089
		-13.25	2	1.023e-16	-0.137			-13.5	0.0020122			-13.25	2	1.491e-17	-0.122				-13.5	0.00483306
		-12.75	3	1.009e-16	-0.124			-13	0.00198466			-12.75	3	2.131e-17	-0.111				-13	0.00690762
		-12.25	4	1.861e-16	-0.105			-12.5	0.0036605			-12.25	4	2.248e-17	-0.106				-12.5	0.00728687
		-11.75	5	2.505e-16	-0.086			-12	0.00492722			-11.75	5	2.582e-17	-0.098				-12	0.00836953
								-0.25	0										-0.25	0
		-11.25	6	3.116e-16	-0.081			-11.5	0.00612903			-11.25	6	3.035e-17	-0.086				-11.5	0.00983793
		-10.75	7	4.287e-16	-0.068			-11	0.00843234			-10.75	7	3.93e-17	-0.085				-11	0.0127391
		-10.25	8	6.901e-16	-0.056			-10.5	0.013574			-10.25	8	4.817e-17	-0.074				-10.5	0.0156143
		-9.75	9	1.208e-15	-0.044			-10	0.0237608			-9.75	9	7.924e-17	-0.059				-10	0.0256856
		-9.25	10	2.133e-15	-0.034			-9.5	0.0419552			-9.25	10	1.143e-16	-0.051				-9.5	0.0370502
								-0.25	0										-0.25	0
		-8.75	11	4.028e-15	-0.025			-9	0.079229			-8.75	11	2.215e-16	-0.037				-9	0.071799
		-8.25	12	6.918e-15	-0.019			-8.5	0.136074			-8.25	12	4.329e-16	-0.027				-8.5	0.140324
		-7.75	13	1.066e-14	-0.015			-8	0.209677			-7.75	13	6.792e-16	-0.022				-8	0.220162
		-7.25	14	1.507e-14	-0.013			-7.5	0.29642			-7.25	14	9.514e-16	-0.019				-7.5	0.308395
		-6.75	15	2.03e-14	-0.011			-7	0.399292			-6.75	15	1.352e-15	-0.016				-7	0.43825
								-0.25	0										-0.25	0
		-6.25	16	2.845e-14	-0.009			-6.5	0.559599			-6.25	16	1.811e-15	-0.013				-6.5	0.587034
		-5.75	17	3.909e-14	-0.008			-6	0.768883			-5.75	17	2.453e-15	-0.012				-6	0.795138
		-5.25	18	5.525e-14	-0.007			-5.5	1.08674			-5.25	18	3.501e-15	-0.01				-5.5	1.13485
		-4.75	19	8.157e-14	-0.006			-5	1.60445			-4.75	19	4.937e-15	-0.008				-5	1.60032
		-4.25	20	1.409e-13	-0.004			-4.5	2.77144			-4.25	20	8.274e-15	-0.006				-4.5	2.68201
								-0.25	0										-0.25	0
		-3.75	21	2.951e-13	-0.003			-4	5.80448			-3.75	21	1.699e-14	-0.004				-4	5.50729
		-3.25	22	6.505e-13	-0.002			-3.5	12.795			-3.25	22	3.923e-14	-0.003				-3.5	12.7164
		-2.75	23	1.381e-12	-0.001			-3	27.1637			-2.75	23	8.527e-14	-0.002				-3	27.6402
		-2.25	24	2.533e-12	-0.001			-2.5	49.823			-2.25	24	1.575e-13	-0.001				-2.5	51.0535
		-1.75	25	3.652e-12	-0.001			-2	71.8332			-1.75	25	2.302e-13	-0.001				-2	74.6191
								-0.25	0										-0.25	0
		-1.25	26	4.39e-12	-0.001			-1.5	86.3493			-1.25	26	2.777e-13	-0.001				-1.5	90.0162
		-0.75	27	4.813e-12	-0.001			-1	94.6696			-0.75	27	2.993e-13	-0.001				-1	97.0178
		-0.25	28	5.026e-12	-0.001			-0.5	98.8592			-0.25	28	3.072e-13	-0.001				-0.5	99.5786
		0.25	29	5.084e-12	-0.001			0	100			0.25	29	3.085e-13	-0.001				0	100
		0.75	30	5.004e-12	-0.001			0.5	98.4264			0.75	30	3.058e-13	-0.001				0.5	99.1248
								-0.25	0										-0.25	0
		1.25	31	4.768e-12	-0.001			1	93.7844			1.25	31	2.982e-13	-0.001				1	96.6613
		1.75	32	4.335e-12	-0.001			1.5	85.2675			1.75	32	2.76e-13	-0.001				1.5	89.4652
		2.25	33	3.597e-12	-0.001			2	70.7514			2.25	33	2.298e-13	-0.001				2	74.4895
		2.75	34	2.491e-12	-0.001			2.5	48.9969			2.75	34	1.569e-13	-0.001				2.5	50.859
		3.25	35	1.359e-12	-0.001			3	26.7309			3.25	35	8.546e-14	-0.002				3	27.7018
								-0.25	0										-0.25	0
		3.75	36	6.39e-13	-0.002			3.5	12.5688			3.75	36	3.881e-14	-0.003				3.5	12.5802
		4.25	37	2.917e-13	-0.003			4	5.73761			4.25	37	1.686e-14	-0.005				4	5.46515
		4.75	38	1.408e-13	-0.004			4.5	2.76947			4.75	38	8.169e-15	-0.006				4.5	2.64797
		5.25	39	8.205e-14	-0.006			5	1.61389			5.25	39	5.03e-15	-0.008				5	1.63047
		5.75	40	5.483e-14	-0.007			5.5	1.07848			5.75	40	3.516e-15	-0.01				5.5	1.13971
								-0.25	0										-0.25	0
		6.25	41	3.968e-14	-0.008			6	0.780488			6.25	41	2.467e-15	-0.012				6	0.799676
		6.75	42	2.858e-14	-0.009			6.5	0.562156			6.75	42	1.838e-15	-0.014				6.5	0.595786
		7.25	43	2.025e-14	-0.011			7	0.398308			7.25	43	1.326e-15	-0.016				7	0.429822
		7.75	44	1.53e-14	-0.013			7.5	0.300944			7.75	44	9.574e-16	-0.018				7.5	0.31034
		8.25	45	1.094e-14	-0.015			8	0.215185			8.25	45	6.661e-16	-0.022				8	0.215916
								-0.25	0										-0.25	0
		8.75	46	7.016e-15	-0.019			8.5	0.138002			8.75	46	4.078e-16	-0.028				8.5	0.132188
		9.25	47	3.964e-15	-0.025			9	0.0779701			9.25	47	2.126e-16	-0.038				9	0.0689141
		9.75	48	2.045e-15	-0.035			9.5	0.0402242			9.75	48	1.125e-16	-0.051				9.5	0.0364668
		10.25	49	1.173e-15	-0.044			10	0.0230724			10.25	49	6.625e-17	-0.064				10	0.0214749
		10.75	50	7.861e-16	-0.054			10.5	0.0154622			10.75	50	5.032e-17	-0.073				10.5	0.0163112
								-0.25	0										-0.25	0
		11.25	51	4.514e-16	-0.067			11	0.00887884			11.25	51	3.676e-17	-0.081				11	0.0119157
		11.75	52	3.303e-16	-0.08			11.5	0.00649685			11.75	52	3.147e-17	-0.088				11.5	0.010201
		12.25	53	2.413e-16	-0.089			12	0.00474626			12.25	53	2.971e-17	-0.096				12	0.00963047
		12.75	54	1.698e-16	-0.099			12.5	0.00333989			12.75	54	2.35e-17	-0.108				12.5	0.0076175
		13.25	55	1.237e-16	-0.127			13	0.00243312			13.25	55	1.75e-17	-0.111				13	0.00567261
								-0.25	0										-0.25	0
		13.75	56	1.511e-16	-0.123			13.5	0.00297207			13.75	56	1.54e-17	-0.124				13.5	0.0049919
		14.25	57	1.063e-16	-0.136			14	0.00209087			14.25	57	1.346e-17	-0.126				14	0.00436305

## Sheet: D2.2cm CR
		woCone 4x4 defined at MLC placement (~SSD 56), phatom placed at SSD60										woCone 4x4 defined at MLC placement (~SSD 56), phatom placed at SSD60
		SFF	both Up & Down foil removed					Jaw open 40x40 SSD 100				SF							Jaw open 40x40 SSD 100
		DOSXYZnrc ($Revision:1.50 $) Dose outputs (dose/F, Gy.cm**2)										DOSXYZnrc ($Revision:1.50 $) Dose outputs (dose/F, Gy.cm**2)
		for z= 2.100 to 2.300 k= 13										for z= 2.100 to 2.300 k= 13
		ybounds: -0.250 0.250										ybounds: -0.250 0.250
		j= 29										j= 29
		xbounds ( -14.250)						Xcenter	Dose(%)			xbounds ( -14.250)							Xcenter	Dose(%)
		-13.75	1	8.687e-17	-0.154			-14	0.00192787			-13.75	1	1.183e-17	-0.136				-14	0.00489855
		-13.25	2	8.816e-17	-0.126			-13.5	0.0019565			-13.25	2	1.306e-17	-0.125				-13.5	0.00540787
		-12.75	3	1.041e-16	-0.121			-13	0.00231025			-12.75	3	1.673e-17	-0.116				-13	0.00692754
		-12.25	4	1.155e-16	-0.122			-12.5	0.00256325			-12.25	4	2.013e-17	-0.112				-12.5	0.0083354
		-11.75	5	1.619e-16	-0.105			-12	0.00359299			-11.75	5	2.414e-17	-0.1				-12	0.00999586
								-0.25	0										-0.25	0
		-11.25	6	2.057e-16	-0.101			-11.5	0.00456502			-11.25	6	3.066e-17	-0.092				-11.5	0.0126957
		-10.75	7	2.572e-16	-0.082			-11	0.00570794			-10.75	7	2.807e-17	-0.087				-11	0.0116232
		-10.25	8	4.514e-16	-0.067			-10.5	0.0100178			-10.25	8	3.411e-17	-0.082				-10.5	0.0141242
		-9.75	9	6.365e-16	-0.056			-10	0.0141256			-9.75	9	5.361e-17	-0.074				-10	0.0221988
		-9.25	10	1.16e-15	-0.044			-9.5	0.0257435			-9.25	10	7.106e-17	-0.06				-9.5	0.0294244
								-0.25	0										-0.25	0
		-8.75	11	2.202e-15	-0.033			-9	0.0488682			-8.75	11	1.13e-16	-0.049				-9	0.0467909
		-8.25	12	3.836e-15	-0.025			-8.5	0.0851309			-8.25	12	1.887e-16	-0.04				-8.5	0.0781366
		-7.75	13	5.933e-15	-0.02			-8	0.131669			-7.75	13	3.215e-16	-0.031				-8	0.133126
		-7.25	14	9.091e-15	-0.016			-7.5	0.201753			-7.25	14	4.559e-16	-0.026				-7.5	0.188778
		-6.75	15	1.284e-14	-0.014			-7	0.284953			-6.75	15	6.637e-16	-0.022				-7	0.274824
								-0.25	0										-0.25	0
		-6.25	16	1.841e-14	-0.012			-6.5	0.408566			-6.25	16	9.404e-16	-0.018				-6.5	0.3894
		-5.75	17	2.6e-14	-0.01			-6	0.577008			-5.75	17	1.359e-15	-0.015				-6	0.562733
		-5.25	18	3.878e-14	-0.008			-5.5	0.86063			-5.25	18	2.011e-15	-0.013				-5.5	0.832712
		-4.75	19	5.916e-14	-0.007			-5	1.31292			-4.75	19	3.018e-15	-0.01				-5	1.24969
		-4.25	20	1.098e-13	-0.005			-4.5	2.43675			-4.25	20	5.198e-15	-0.008				-4.5	2.15238
								-0.25	0										-0.25	0
		-3.75	21	2.534e-13	-0.003			-4	5.62361			-3.75	21	1.155e-14	-0.005				-4	4.78261
		-3.25	22	6.025e-13	-0.002			-3.5	13.3711			-3.25	22	2.948e-14	-0.003				-3.5	12.207
		-2.75	23	1.271e-12	-0.001			-3	28.2068			-2.75	23	6.616e-14	-0.002				-3	27.3954
		-2.25	24	2.23e-12	-0.001			-2.5	49.4896			-2.25	24	1.226e-13	-0.002				-2.5	50.766
		-1.75	25	3.173e-12	-0.001			-2	70.4172			-1.75	25	1.777e-13	-0.001				-2	73.5818
								-0.25	0										-0.25	0
		-1.25	26	3.855e-12	-0.001			-1.5	85.5526			-1.25	26	2.158e-13	-0.001				-1.5	89.3582
		-0.75	27	4.253e-12	-0.001			-1	94.3853			-0.75	27	2.339e-13	-0.001				-1	96.853
		-0.25	28	4.447e-12	-0.001			-0.5	98.6906			-0.25	28	2.405e-13	-0.001				-0.5	99.5859
		0.25	29	4.506e-12	-0.001			0	100			0.25	29	2.415e-13	-0.001				0	100
		0.75	30	4.435e-12	-0.001			0.5	98.4243			0.75	30	2.392e-13	-0.001				0.5	99.0476
								-0.25	0										-0.25	0
		1.25	31	4.217e-12	-0.001			1	93.5863			1.25	31	2.334e-13	-0.001				1	96.646
		1.75	32	3.801e-12	-0.001			1.5	84.3542			1.75	32	2.152e-13	-0.001				1.5	89.1097
		2.25	33	3.125e-12	-0.001			2	69.352			2.25	33	1.77e-13	-0.001				2	73.2919
		2.75	34	2.189e-12	-0.001			2.5	48.5797			2.75	34	1.215e-13	-0.002				2.5	50.3106
		3.25	35	1.249e-12	-0.001			3	27.7186			3.25	35	6.617e-14	-0.002				3	27.3996
								-0.25	0										-0.25	0
		3.75	36	5.939e-13	-0.002			3.5	13.1802			3.75	36	2.921e-14	-0.003				3.5	12.0952
		4.25	37	2.524e-13	-0.003			4	5.60142			4.25	37	1.147e-14	-0.005				4	4.74948
		4.75	38	1.097e-13	-0.005			4.5	2.43453			4.75	38	5.178e-15	-0.008				4.5	2.1441
		5.25	39	5.949e-14	-0.006			5	1.32024			5.25	39	3.036e-15	-0.01				5	1.25714
		5.75	40	3.849e-14	-0.008			5.5	0.854194			5.75	40	2.004e-15	-0.013				5.5	0.829814
								-0.25	0										-0.25	0
		6.25	41	2.691e-14	-0.01			6	0.597204			6.25	41	1.352e-15	-0.015				6	0.559834
		6.75	42	1.845e-14	-0.012			6.5	0.409454			6.75	42	9.869e-16	-0.018				6.5	0.408654
		7.25	43	1.244e-14	-0.014			7	0.276076			7.25	43	6.614e-16	-0.022				7	0.273872
		7.75	44	8.937e-15	-0.017			7.5	0.198336			7.75	44	4.501e-16	-0.026				7.5	0.186377
		8.25	45	6.308e-15	-0.02			8	0.139991			8.25	45	3.182e-16	-0.031				8	0.13176
								-0.25	0										-0.25	0
		8.75	46	3.829e-15	-0.025			8.5	0.0849756			8.75	46	1.806e-16	-0.04				8.5	0.0747826
		9.25	47	2.041e-15	-0.034			9	0.0452952			9.25	47	1.127e-16	-0.05				9	0.0466667
		9.75	48	1.009e-15	-0.047			9.5	0.0223924			9.75	48	6.074e-17	-0.062				9.5	0.0251511
		10.25	49	6.392e-16	-0.059			10	0.0141855			10.25	49	4.768e-17	-0.072				10	0.0197433
		10.75	50	4.387e-16	-0.065			10.5	0.00973591			10.75	50	3.91e-17	-0.077				10.5	0.0161905
								-0.25	0										-0.25	0
		11.25	51	3.265e-16	-0.079			11	0.00724589			11.25	51	2.995e-17	-0.085				11	0.0124017
		11.75	52	2.266e-16	-0.091			11.5	0.00502885			11.75	52	2.465e-17	-0.099				11.5	0.010207
		12.25	53	1.979e-16	-0.099			12	0.00439192			12.25	53	2.397e-17	-0.101				12	0.00992547
		12.75	54	1.049e-16	-0.122			12.5	0.00232801			12.75	54	2.259e-17	-0.105				12.5	0.00935404
		13.25	55	1.214e-16	-0.122			13	0.00269419			13.25	55	1.525e-17	-0.123				13	0.0063147
								-0.25	0										-0.25	0
		13.75	56	8.503e-17	-0.15			13.5	0.00188704			13.75	56	1.663e-17	-0.122				13.5	0.00688613
		14.25	57	7.639e-17	-0.142			14	0.0016953			14.25	57	1.271e-17	-0.127				14	0.00526294

## Sheet: D2.6cm CR
		woCone 4x4 defined at MLC placement (~SSD 56), phatom placed at SSD60										woCone 4x4 defined at MLC placement (~SSD 56), phatom placed at SSD60
		SFF	both Up & Down foil removed					Jaw open 40x40 SSD 100				SF							Jaw open 40x40 SSD 100
		DOSXYZnrc ($Revision:1.50 $) Dose outputs (dose/F, Gy.cm**2)										DOSXYZnrc ($Revision:1.50 $) Dose outputs (dose/F, Gy.cm**2)
		for z= 2.500 to 2.700 k= 15										for z= 2.500 to 2.700 k= 15
		ybounds: -0.250 0.250										ybounds: -0.250 0.250
		j= 29										j= 29
		xbounds ( -14.250)						Xcenter	Dose(%)			xbounds ( -14.250)							Xcenter	Dose(%)
		-13.75	1	6.579e-17	-0.153			-14	0.00211952			-13.75	1	1.289e-17	-0.137				-14	0.0108138
		-13.25	2	9.111e-17	-0.138			-13.5	0.00293524			-13.25	2	1.483e-17	-0.12				-13.5	0.0124413
		-12.75	3	1.113e-16	-0.124			-13	0.0035857			-12.75	3	2.087e-17	-0.101				-13	0.0175084
		-12.25	4	1.085e-16	-0.122			-12.5	0.00349549			-12.25	4	2.082e-17	-0.112				-12.5	0.0174664
		-11.75	5	1.587e-16	-0.112			-12	0.00511276			-11.75	5	2.528e-17	-0.098				-12	0.0212081
								-0.25	0										-0.25	0
		-11.25	6	1.627e-16	-0.104			-11.5	0.00524162			-11.25	6	2.786e-17	-0.092				-11.5	0.0233725
		-10.75	7	2.111e-16	-0.092			-11	0.0068009			-10.75	7	3.029e-17	-0.09				-11	0.0254111
		-10.25	8	2.743e-16	-0.084			-10.5	0.00883698			-10.25	8	3.969e-17	-0.081				-10.5	0.033297
		-9.75	9	3.394e-16	-0.07			-10	0.0109343			-9.75	9	4.526e-17	-0.075				-10	0.0379698
		-9.25	10	4.495e-16	-0.068			-9.5	0.0144813			-9.25	10	4.435e-17	-0.069				-9.5	0.0372064
								-0.25	0										-0.25	0
		-8.75	11	7.489e-16	-0.051			-9	0.0241269			-8.75	11	5.177e-17	-0.07				-9	0.0434312
		-8.25	12	1.173e-15	-0.042			-8.5	0.0377899			-8.25	12	6.723e-17	-0.059				-8.5	0.056401
		-7.75	13	1.98e-15	-0.034			-8	0.0637887			-7.75	13	1.039e-16	-0.05				-8	0.0871644
		-7.25	14	3.029e-15	-0.027			-7.5	0.0975838			-7.25	14	1.327e-16	-0.044				-7.5	0.111326
		-6.75	15	4.595e-15	-0.022			-7	0.148035			-6.75	15	1.964e-16	-0.037				-7	0.164765
								-0.25	0										-0.25	0
		-6.25	16	7.196e-15	-0.018			-6.5	0.23183			-6.25	16	2.597e-16	-0.033				-6.5	0.217869
		-5.75	17	1.082e-14	-0.015			-6	0.348582			-5.75	17	3.815e-16	-0.028				-6	0.32005
		-5.25	18	1.758e-14	-0.012			-5.5	0.566366			-5.25	18	5.531e-16	-0.023				-5.5	0.46401
		-4.75	19	2.802e-14	-0.009			-5	0.902706			-4.75	19	9.089e-16	-0.018				-5	0.7625
		-4.25	20	5.443e-14	-0.007			-4.5	1.75354			-4.25	20	1.658e-15	-0.014				-4.5	1.39094
								-0.25	0										-0.25	0
		-3.75	21	1.421e-13	-0.004			-4	4.57796			-3.75	21	3.834e-15	-0.009				-4	3.21644
		-3.25	22	3.833e-13	-0.003			-3.5	12.3486			-3.25	22	1.159e-14	-0.005				-3.5	9.72315
		-2.75	23	8.524e-13	-0.002			-3	27.4613			-2.75	23	2.988e-14	-0.003				-3	25.0671
		-2.25	24	1.501e-12	-0.001			-2.5	48.357			-2.25	24	5.878e-14	-0.002				-2.5	49.3121
		-1.75	25	2.15e-12	-0.001			-2	69.2655			-1.75	25	8.805e-14	-0.002				-2	73.8674
								-0.25	0										-0.25	0
		-1.25	26	2.645e-12	-0.001			-1.5	85.2126			-1.25	26	1.078e-13	-0.002				-1.5	90.4362
		-0.75	27	2.935e-12	-0.001			-1	94.5554			-0.75	27	1.162e-13	-0.002				-1	97.4832
		-0.25	28	3.068e-12	-0.001			-0.5	98.8402			-0.25	28	1.192e-13	-0.002				-0.5	100
		0.25	29	3.104e-12	-0.001			0	100			0.25	29	1.192e-13	-0.002				0	100
		0.75	30	3.056e-12	-0.001			0.5	98.4536			0.75	30	1.181e-13	-0.002				0.5	99.0772
								-0.25	0										-0.25	0
		1.25	31	2.907e-12	-0.001			1	93.6534			1.25	31	1.155e-13	-0.002				1	96.896
		1.75	32	2.606e-12	-0.001			1.5	83.9562			1.75	32	1.071e-13	-0.002				1.5	89.849
		2.25	33	2.121e-12	-0.001			2	68.3312			2.25	33	8.763e-14	-0.002				2	73.5151
		2.75	34	1.474e-12	-0.001			2.5	47.4871			2.75	34	5.833e-14	-0.002				2.5	48.9346
		3.25	35	8.352e-13	-0.002			3	26.9072			3.25	35	2.976e-14	-0.003				3	24.9664
								-0.25	0										-0.25	0
		3.75	36	3.771e-13	-0.003			3.5	12.1488			3.75	36	1.155e-14	-0.005				3.5	9.6896
		4.25	37	1.407e-13	-0.004			4	4.53286			4.25	37	3.852e-15	-0.009				4	3.23154
		4.75	38	5.412e-14	-0.007			4.5	1.74356			4.75	38	1.616e-15	-0.014				4.5	1.3557
		5.25	39	2.82e-14	-0.009			5	0.908505			5.25	39	9.248e-16	-0.018				5	0.775839
		5.75	40	1.69e-14	-0.012			5.5	0.544459			5.75	40	5.847e-16	-0.023				5.5	0.49052
								-0.25	0										-0.25	0
		6.25	41	1.085e-14	-0.015			6	0.349549			6.25	41	3.588e-16	-0.028				6	0.301007
		6.75	42	7.105e-15	-0.018			6.5	0.228898			6.75	42	2.442e-16	-0.033				6.5	0.204866
		7.25	43	4.836e-15	-0.022			7	0.155799			7.25	43	1.878e-16	-0.038				7	0.15755
		7.75	44	3.12e-15	-0.027			7.5	0.100515			7.75	44	1.303e-16	-0.045				7.5	0.109312
		8.25	45	1.92e-15	-0.034			8	0.0618557			8.25	45	1.002e-16	-0.05				8	0.0840604
								-0.25	0										-0.25	0
		8.75	46	1.224e-15	-0.042			8.5	0.039433			8.75	46	7.346e-17	-0.058				8.5	0.0616275
		9.25	47	7.555e-16	-0.051			9	0.0243396			9.25	47	5.902e-17	-0.066				9	0.0495134
		9.75	48	4.675e-16	-0.062			9.5	0.0150612			9.75	48	4.766e-17	-0.071				9.5	0.0399832
		10.25	49	2.9e-16	-0.076			10	0.00934278			10.25	49	4.048e-17	-0.079				10	0.0339597
		10.75	50	2.46e-16	-0.08			10.5	0.00792526			10.75	50	3.61e-17	-0.078				10.5	0.0302852
								-0.25	0										-0.25	0
		11.25	51	2.028e-16	-0.096			11	0.00653351			11.25	51	2.653e-17	-0.097				11	0.0222567
		11.75	52	1.712e-16	-0.103			11.5	0.00551546			11.75	52	2.444e-17	-0.096				11.5	0.0205034
		12.25	53	1.084e-16	-0.108			12	0.00349227			12.25	53	2.574e-17	-0.103				12	0.021594
		12.75	54	1.18e-16	-0.111			12.5	0.00380155			12.75	54	2.045e-17	-0.113				12.5	0.017156
		13.25	55	9.158e-17	-0.13			13	0.00295039			13.25	55	1.863e-17	-0.106				13	0.0156292
								-0.25	0										-0.25	0
		13.75	56	8.501e-17	-0.158			13.5	0.00273872			13.75	56	1.53e-17	-0.124				13.5	0.0128356
		14.25	57	8.021e-17	-0.142			14	0.00258409			14.25	57	1.027e-17	-0.139				14	0.00861577
