# Supplementary material for: Monte Carlo simulation for scanning technique with scattering foil free electron beam: A proof of concept study
Source: PLoS One. 2017 May 11;12(5):e0177380. doi: 10.1371/journal.pone.0177380 (PMC5426680; doi:10.1371/journal.pone.0177380)
Supplement: S5 Table — The 6 MeV electron beams with a field size of 10 cm by 10 cm, which were collimated by the multi-leaf collimators are shown with and without scattering foil. (XLSX) [file pone.0177380.s005.xlsx]

## Sheet: PDD
		woCone 10x10 defined at MLC placement (~SSD 56), phatom placed at SSD60									woCone 10x10 defined at MLC placement (~SSD 56), phatom placed at SSD60									woCone 10x10 defined at MLC placement (~SSD 56), phatom placed at SSD60									woCone 10x10 defined at MLC placement (~SSD 56), phatom placed at SSD60									woCone 10x10 defined at MLC placement (~SSD 56), phatom placed at SSD60
		SFF	both Up & Down foil removed					Jaw open 20x20 SSD 100			SFF LargeJaw		both Up & Down foil removed			Jaw open 40x40 SSD 100				SFF DownfoilOnly		Up removed & Down only			Jaw open 40x40 SSD 100				SF LargeJaw		both Up & Down foil removed			Jaw open 40x40 SSD 100				SF
		DOSXYZnrc ($Revision:1.50 $) Dose outputs (dose/F, Gy.cm**2)									DOSXYZnrc ($Revision:1.50 $) Dose outputs (dose/F, Gy.cm**2)									DOSXYZnrc ($Revision:1.50 $) Dose outputs (dose/F, Gy.cm**2)									DOSXYZnrc ($Revision:1.50 $) Dose outputs (dose/F, Gy.cm**2)									DOSXYZnrc ($Revision:1.50 $) Dose outputs (dose/F, Gy.cm**2)
		for x= -0.250 to 0.250 i= 29									for x= -0.250 to 0.250 i= 29									for x= -0.250 to 0.250 i= 29									for x= -0.250 to 0.250 i= 29									for x= -0.250 to 0.250 i= 29
		ybounds: -0.250 0.250									ybounds: -0.250 0.250									ybounds: -0.250 0.250									ybounds: -0.250 0.250									ybounds: -0.250 0.250
		j= 29									j= 29									j= 29									j= 29									j= 29
		zbounds ( -0.100)						Depth (cm)	Dose(%)		zbounds ( -0.100)						Depth (cm)	Dose(%)		zbounds ( -0.100)						Depth (cm)	Dose(%)		zbounds ( -0.100)						Depth (cm)	Dose(%)		zbounds ( -0.100)							Depth (cm)	Dose(%)
		0.1	1	3.897e-12	-0.002			0	78.8866		0.1	1	3.877e-12	-0.002			0	79.074		0.1	1	5.911e-13	-0.002			0	79.5773		0.1	1	2.939e-13	-0.003			0	80.1254		0.1	1	2.935e-13	-0.003				0	78.581
		0.3	2	4.105e-12	-0.002			0.2	83.0972		0.3	2	4.081e-12	-0.002			0.2	83.2348		0.3	2	6.219e-13	-0.002			0.2	83.7237		0.3	2	3.108e-13	-0.003			0.2	84.7328		0.3	2	3.116e-13	-0.002				0.2	83.427
		0.5	3	4.244e-12	-0.002			0.4	85.9109		0.5	3	4.209e-12	-0.001			0.4	85.8454		0.5	3	6.445e-13	-0.002			0.4	86.7663		0.5	3	3.23e-13	-0.003			0.4	88.0589		0.5	3	3.248e-13	-0.002				0.4	86.9612
		0.7	4	4.377e-12	-0.002			0.6	88.6032		0.7	4	4.344e-12	-0.001			0.6	88.5988		0.7	4	6.661e-13	-0.002			0.6	89.6742		0.7	4	3.353e-13	-0.002			0.6	91.4122		0.7	4	3.376e-13	-0.002				0.6	90.3882
		0.9	5	4.519e-12	-0.001			0.8	91.4777		0.9	5	4.48e-12	-0.001			0.8	91.3726		0.9	5	6.886e-13	-0.002			0.8	92.7033		0.9	5	3.48e-13	-0.002			0.8	94.8746		0.9	5	3.511e-13	-0.002				0.8	94.0027
								-0.1	0								-0.1	0								-0.1	0								-0.1	0									-0.1	0
		1.1	6	4.665e-12	-0.001			1	94.4332		1.1	6	4.625e-12	-0.001			1	94.33		1.1	6	7.114e-13	-0.002			1	95.7728		1.1	6	3.588e-13	-0.002			1	97.819		1.1	6	3.631e-13	-0.002				1	97.2155
		1.2	7	4.78e-12	-0.001			1.1	96.7611		1.2	7	4.742e-12	-0.001			1.1	96.7163		1.2	7	7.276e-13	-0.002			1.1	97.9537		1.2	7	3.662e-13	-0.002			1.1	99.8364		1.2	7	3.718e-13	-0.002				1.1	99.5448
		1.4	8	4.864e-12	-0.001			1.3	98.4615		1.4	8	4.831e-12	-0.001			1.3	98.5315		1.4	8	7.383e-13	-0.002			1.3	99.3942		1.4	8	3.668e-13	-0.002			1.3	100		1.4	8	3.735e-13	-0.002				1.3	100
		1.6	9	4.94e-12	-0.001			1.5	100		1.6	9	4.903e-12	-0.001			1.5	100		1.6	9	7.428e-13	-0.002			1.5	100		1.6	9	3.611e-13	-0.002			1.5	98.446		1.6	9	3.683e-13	-0.002				1.5	98.6078
		1.8	10	4.913e-12	-0.001			1.7	99.4534		1.8	10	4.874e-12	-0.001			1.7	99.4085		1.8	10	7.305e-13	-0.002			1.7	98.3441		1.8	10	3.425e-13	-0.002			1.7	93.3751		1.8	10	3.508e-13	-0.002				1.7	93.9224
								-0.1	0								-0.1	0								-0.1	0								-0.1	0									-0.1	0
		2	11	4.744e-12	-0.001			1.9	96.0324		2	11	4.716e-12	-0.001			1.9	96.186		2	11	6.964e-13	-0.002			1.9	93.7534		2	11	3.106e-13	-0.002			1.9	84.6783		2	11	3.177e-13	-0.002				1.9	85.0602
		2.1	12	4.548e-12	-0.001			2	92.0648		2.1	12	4.532e-12	-0.001			2	92.4332		2.1	12	6.591e-13	-0.002			2	88.7318		2.1	12	2.788e-13	-0.003			2	76.0087		2.1	12	2.869e-13	-0.002				2	76.8139
		2.3	13	4.207e-12	-0.001			2.2	85.1619		2.3	13	4.18e-12	-0.001			2.2	85.2539		2.3	13	5.971e-13	-0.002			2.2	80.385		2.3	13	2.374e-13	-0.002			2.2	64.7219		2.3	13	2.439e-13	-0.002				2.2	65.3012
		2.5	14	3.62e-12	-0.001			2.4	73.2794		2.5	14	3.602e-12	-0.001			2.4	73.4652		2.5	14	4.996e-13	-0.002			2.4	67.259		2.5	14	1.761e-13	-0.003			2.4	48.0098		2.5	14	1.81e-13	-0.002				2.4	48.4605
		2.7	15	2.895e-12	-0.002			2.6	58.6032		2.7	15	2.873e-12	-0.001			2.6	58.5968		2.7	15	3.817e-13	-0.002			2.6	51.3866		2.7	15	1.142e-13	-0.003			2.6	31.1341		2.7	15	1.17e-13	-0.003				2.6	31.3253
								-0.1	0								-0.1	0								-0.1	0								-0.1	0									-0.1	0
		3	16	1.846e-12	-0.002			2.9	37.3684		3	16	1.84e-12	-0.002			2.9	37.528		3	16	2.287e-13	-0.003			2.9	30.7889		3	16	4.872e-14	-0.005			2.9	13.2824		3	16	4.993e-14	-0.004				2.9	13.3681
		3.5	17	4.957e-13	-0.003			3.4	10.0344		3.5	17	4.931e-13	-0.002			3.4	10.0571		3.5	17	5.399e-14	-0.004			3.4	7.26844		3.5	17	6.004e-15	-0.009			3.4	1.63686		3.5	17	6.081e-15	-0.008				3.4	1.62811
		4	18	1.499e-14	-0.012			3.9	0.303441		4	18	1.51e-14	-0.01			3.9	0.307975		4	18	3.168e-15	-0.014			3.9	0.426494		4	18	2.137e-15	-0.015			3.9	0.582606		4	18	2.121e-15	-0.013				3.9	0.567871
		4.4	19	8.977e-15	-0.017			4.3	0.181721		4.4	19	9.175e-15	-0.015			4.3	0.18713		4.4	19	2.845e-15	-0.017			4.3	0.38301		4.4	19	2.027e-15	-0.017			4.3	0.552617		4.4	19	1.997e-15	-0.015				4.3	0.534672
		4.8	20	8.433e-15	-0.018			4.7	0.170709		4.8	20	8.422e-15	-0.016			4.7	0.171772		4.8	20	2.699e-15	-0.017			4.7	0.363355		4.8	20	1.944e-15	-0.017			4.7	0.529989		4.8	20	1.926e-15	-0.015				4.7	0.515663
								-0.1	0								-0.1	0								-0.1	0								-0.1	0									-0.1	0
		5.2	21	7.858e-15	-0.018			5.1	0.159069		5.2	21	7.667e-15	-0.016			5.1	0.156374		5.2	21	2.554e-15	-0.018			5.1	0.343834		5.2	21	1.892e-15	-0.018			5.1	0.515812		5.2	21	1.838e-15	-0.016				5.1	0.492102
		5.6	22	7.261e-15	-0.019			5.5	0.146984		5.6	22	7.123e-15	-0.018			5.5	0.145278		5.6	22	2.413e-15	-0.018			5.5	0.324852		5.6	22	1.79e-15	-0.018			5.5	0.488004		5.6	22	1.773e-15	-0.016				5.5	0.474699
		6	23	6.712e-15	-0.02			5.9	0.13587		6	23	6.446e-15	-0.018			5.9	0.131471		6	23	2.274e-15	-0.019			5.9	0.306139		6	23	1.675e-15	-0.019			5.9	0.456652		6	23	1.679e-15	-0.017				5.9	0.449531

## Sheet: D1.3cm CR
		woCone 10x10 defined at MLC placement (~SSD 56), phatom placed at SSD60									woCone 10x10 defined at MLC placement (~SSD 56), phatom placed at SSD60									woCone 10x10 defined at MLC placement (~SSD 56), phatom placed at SSD60									woCone 10x10 defined at MLC placement (~SSD 56), phatom placed at SSD60									woCone 10x10 defined at MLC placement (~SSD 56), phatom placed at SSD60
		SFF	both Up & Down foil removed					Jaw open 20x20 SSD 100			SFF LargeJaw		both Up & Down foil removed			Jaw open 40x40 SSD 100				SFF DownfoilOnly		Up removed & Down only			Jaw open 40x40 SSD 100				SF LargeJaw		both Up & Down foil removed			Jaw open 40x40 SSD 100				SF
		DOSXYZnrc ($Revision:1.50 $) Dose outputs (dose/F, Gy.cm**2)									DOSXYZnrc ($Revision:1.50 $) Dose outputs (dose/F, Gy.cm**2)									DOSXYZnrc ($Revision:1.50 $) Dose outputs (dose/F, Gy.cm**2)									DOSXYZnrc ($Revision:1.50 $) Dose outputs (dose/F, Gy.cm**2)									DOSXYZnrc ($Revision:1.50 $) Dose outputs (dose/F, Gy.cm**2)
		for z= 1.200 to 1.400 k= 8									for z= 1.200 to 1.400 k= 8									for z= 1.200 to 1.400 k= 8									for z= 1.200 to 1.400 k= 8									for z= 1.200 to 1.400 k= 8
		ybounds: -0.250 0.250									ybounds: -0.250 0.250									ybounds: -0.250 0.250									ybounds: -0.250 0.250									ybounds: -0.250 0.250
		j= 29									j= 29									j= 29									j= 29									j= 29
		xbounds ( -14.250)						Xcenter	Dose(%)		xbounds ( -14.250)						Xcenter	Dose(%)		xbounds ( -14.250)						Xcenter	Dose(%)		xbounds ( -14.250)						Xcenter	Dose(%)		xbounds ( -14.250)							Xcenter	Dose(%)
		-13.75	1	1.756e-15	-0.063			-14	0.036102		-13.75	1	1.981e-15	-0.053			-14	0.041006		-13.75	1	1.265e-15	-0.039			-14	0.17134		-13.75	1	5.518e-16	-0.051			-14	0.150436		-13.75	1	3.544e-16	-0.054				-14	0.0948862
		-13.25	2	2.099e-15	-0.058			-13.5	0.0431538		-13.25	2	2.617e-15	-0.046			-13.5	0.054171		-13.25	2	1.657e-15	-0.034			-13.5	0.224435		-13.25	2	7.916e-16	-0.042			-13.5	0.215812		-13.25	2	5.454e-16	-0.044				-13.5	0.146024
		-12.75	3	3.186e-15	-0.048			-13	0.0655016		-12.75	3	3.148e-15	-0.041			-13	0.0651625		-12.75	3	2.126e-15	-0.031			-13	0.287959		-12.75	3	1.017e-15	-0.037			-13	0.277263		-12.75	3	6.985e-16	-0.04				-13	0.187015
		-12.25	4	3.713e-15	-0.044			-12.5	0.0763363		-12.25	4	4.234e-15	-0.036			-12.5	0.0876423		-12.25	4	2.627e-15	-0.027			-12.5	0.355817		-12.25	4	1.236e-15	-0.033			-12.5	0.336968		-12.25	4	8.488e-16	-0.035				-12.5	0.227256
		-11.75	5	5.064e-15	-0.038			-12	0.104112		-11.75	5	5.473e-15	-0.032			-12	0.113289		-11.75	5	3.42e-15	-0.024			-12	0.463226		-11.75	5	1.606e-15	-0.029			-12	0.437841		-11.75	5	1.195e-15	-0.03				-12	0.319946
								-0.25	0								-0.25	0								-0.25	0								-0.25	0									-0.25	0
		-11.25	6	7.002e-15	-0.032			-11.5	0.143956		-11.25	6	7.208e-15	-0.028			-11.5	0.149203		-11.25	6	4.464e-15	-0.021			-11.5	0.604632		-11.25	6	1.985e-15	-0.026			-11.5	0.541167		-11.25	6	1.541e-15	-0.026				-11.5	0.412584
		-10.75	7	8.907e-15	-0.029			-11	0.183121		-10.75	7	9.434e-15	-0.024			-11	0.19528		-10.75	7	5.544e-15	-0.019			-11	0.750914		-10.75	7	2.533e-15	-0.023			-11	0.690567		-10.75	7	2.066e-15	-0.023				-11	0.553146
		-10.25	8	1.128e-14	-0.026			-10.5	0.231908		-10.25	8	1.181e-14	-0.022			-10.5	0.244463		-10.25	8	7.186e-15	-0.017			-10.5	0.973317		-10.25	8	3.31e-15	-0.02			-10.5	0.902399		-10.25	8	2.738e-15	-0.02				-10.5	0.733066
		-9.75	9	1.41e-14	-0.023			-10	0.289885		-9.75	9	1.454e-14	-0.02			-10	0.300973		-9.75	9	9.269e-15	-0.015			-10	1.25545		-9.75	9	4.468e-15	-0.018			-10	1.2181		-9.75	9	3.884e-15	-0.017				-10	1.03989
		-9.25	10	1.942e-14	-0.02			-9.5	0.39926		-9.25	10	1.909e-14	-0.017			-9.5	0.395156		-9.25	10	1.213e-14	-0.013			-9.5	1.64296		-9.25	10	5.972e-15	-0.015			-9.5	1.62814		-9.25	10	5.21e-15	-0.015				-9.5	1.39491
								-0.25	0								-0.25	0								-0.25	0								-0.25	0									-0.25	0
		-8.75	11	2.472e-14	-0.017			-9	0.508224		-8.75	11	2.503e-14	-0.015			-9	0.518112		-8.75	11	1.572e-14	-0.011			-9	2.12922		-8.75	11	7.94e-15	-0.013			-9	2.16467		-8.75	11	6.977e-15	-0.013				-9	1.86801
		-8.25	12	3.5e-14	-0.015			-8.5	0.719572		-8.25	12	3.483e-14	-0.013			-8.5	0.720969		-8.25	12	2.082e-14	-0.01			-8.5	2.81999		-8.25	12	1.067e-14	-0.012			-8.5	2.90894		-8.25	12	9.614e-15	-0.011				-8.5	2.57403
		-7.75	13	5.699e-14	-0.011			-8	1.17167		-7.75	13	5.62e-14	-0.01			-8	1.16332		-7.75	13	3.034e-14	-0.008			-8	4.10944		-7.75	13	1.539e-14	-0.01			-8	4.19575		-7.75	13	1.463e-14	-0.009				-8	3.917
		-7.25	14	1.044e-13	-0.008			-7.5	2.14638		-7.25	14	1.023e-13	-0.008			-7.5	2.11757		-7.25	14	4.807e-14	-0.007			-7.5	6.5109		-7.25	14	2.534e-14	-0.008			-7.5	6.9084		-7.25	14	2.47e-14	-0.007				-7.5	6.61312
		-6.75	15	2.258e-13	-0.006			-7	4.64227		-6.75	15	2.188e-13	-0.005			-7	4.52908		-6.75	15	8.65e-14	-0.005			-7	11.7161		-6.75	15	4.843e-14	-0.005			-7	13.2034		-6.75	15	4.879e-14	-0.005				-7	13.0629
								-0.25	0								-0.25	0								-0.25	0								-0.25	0									-0.25	0
		-6.25	16	5.676e-13	-0.004			-6.5	11.6694		-6.25	16	5.517e-13	-0.003			-6.5	11.42		-6.25	16	1.918e-13	-0.003			-6.5	25.9786		-6.25	16	1.054e-13	-0.004			-6.5	28.735		-6.25	16	1.072e-13	-0.003				-6.5	28.7015
		-5.75	17	1.108e-12	-0.003			-6	22.7796		-5.75	17	1.085e-12	-0.002			-6	22.4591		-5.75	17	3.965e-13	-0.002			-6	53.7045		-5.75	17	2.089e-13	-0.003			-6	56.952		-5.75	17	2.117e-13	-0.002				-6	56.6801
		-5.25	18	1.555e-12	-0.002			-5.5	31.9696		-5.25	18	1.516e-12	-0.002			-5.5	31.3807		-5.25	18	5.631e-13	-0.002			-5.5	76.2698		-5.25	18	2.946e-13	-0.002			-5.5	80.3162		-5.25	18	3.004e-13	-0.002				-5.5	80.4284
		-4.75	19	1.914e-12	-0.002			-5	39.3503		-4.75	19	1.869e-12	-0.002			-5	38.6876		-4.75	19	6.327e-13	-0.002			-5	85.6969		-4.75	19	3.321e-13	-0.002			-5	90.5398		-4.75	19	3.437e-13	-0.002				-5	92.0214
		-4.25	20	2.273e-12	-0.002			-4.5	46.7311		-4.25	20	2.22e-12	-0.002			-4.5	45.9532		-4.25	20	6.677e-13	-0.002			-4.5	90.4375		-4.25	20	3.483e-13	-0.002			-4.5	94.9564		-4.25	20	3.62e-13	-0.002				-4.5	96.921
								-0.25	0								-0.25	0								-0.25	0								-0.25	0									-0.25	0
		-3.75	21	2.64e-12	-0.002			-4	54.2763		-3.75	21	2.581e-12	-0.001			-4	53.4258		-3.75	21	6.923e-13	-0.002			-4	93.7695		-3.75	21	3.58e-13	-0.002			-4	97.6009		-3.75	21	3.723e-13	-0.002				-4	99.6787
		-3.25	22	3.025e-12	-0.002			-3.5	62.1916		-3.25	22	2.972e-12	-0.001			-3.5	61.5194		-3.25	22	7.08e-13	-0.002			-3.5	95.896		-3.25	22	3.624e-13	-0.002			-3.5	98.8004		-3.25	22	3.78e-13	-0.002				-3.5	101.205
		-2.75	23	3.415e-12	-0.001			-3	70.2097		-2.75	23	3.363e-12	-0.001			-3	69.6129		-2.75	23	7.201e-13	-0.002			-3	97.5349		-2.75	23	3.649e-13	-0.002			-3	99.482		-2.75	23	3.793e-13	-0.002				-3	101.553
		-2.25	24	3.8e-12	-0.001			-2.5	78.125		-2.25	24	3.749e-12	-0.001			-2.5	77.603		-2.25	24	7.246e-13	-0.002			-2.5	98.1444		-2.25	24	3.674e-13	-0.002			-2.5	100.164		-2.25	24	3.802e-13	-0.002				-2.5	101.794
		-1.75	25	4.153e-12	-0.001			-2	85.3824		-1.75	25	4.107e-12	-0.001			-2	85.0135		-1.75	25	7.301e-13	-0.002			-2	98.8893		-1.75	25	3.679e-13	-0.002			-2	100.3		-1.75	25	3.782e-13	-0.002				-2	101.258
								-0.25	0								-0.25	0								-0.25	0								-0.25	0									-0.25	0
		-1.25	26	4.457e-12	-0.001			-1.5	91.6324		-1.25	26	4.411e-12	-0.001			-1.5	91.3061		-1.25	26	7.343e-13	-0.002			-1.5	99.4582		-1.25	26	3.67e-13	-0.002			-1.5	100.055		-1.25	26	3.772e-13	-0.002				-1.5	100.991
		-0.75	27	4.673e-12	-0.001			-1	96.0732		-0.75	27	4.643e-12	-0.001			-1	96.1085		-0.75	27	7.387e-13	-0.002			-1	100.054		-0.75	27	3.675e-13	-0.002			-1	100.191		-0.75	27	3.745e-13	-0.002				-1	100.268
		-0.25	28	4.82e-12	-0.001			-0.5	99.0954		-0.25	28	4.796e-12	-0.001			-0.5	99.2755		-0.25	28	7.386e-13	-0.002			-0.5	100.041		-0.25	28	3.674e-13	-0.002			-0.5	100.164		-0.25	28	3.731e-13	-0.002				-0.5	99.8929
		0.25	29	4.864e-12	-0.001			0	100		0.25	29	4.831e-12	-0.001			0	100		0.25	29	7.383e-13	-0.002			0	100		0.25	29	3.668e-13	-0.002			0	100		0.25	29	3.735e-13	-0.002				0	100
		0.75	30	4.797e-12	-0.001			0.5	98.6225		0.75	30	4.763e-12	-0.001			0.5	98.5924		0.75	30	7.361e-13	-0.002			0.5	99.702		0.75	30	3.669e-13	-0.002			0.5	100.027		0.75	30	3.737e-13	-0.002				0.5	100.054
								-0.25	0								-0.25	0								-0.25	0								-0.25	0									-0.25	0
		1.25	31	4.623e-12	-0.001			1	95.0452		1.25	31	4.608e-12	-0.001			1	95.384		1.25	31	7.332e-13	-0.002			1	99.3092		1.25	31	3.672e-13	-0.002			1	100.109		1.25	31	3.75e-13	-0.002				1	100.402
		1.75	32	4.394e-12	-0.001			1.5	90.3372		1.75	32	4.358e-12	-0.001			1.5	90.2091		1.75	32	7.308e-13	-0.002			1.5	98.9842		1.75	32	3.676e-13	-0.002			1.5	100.218		1.75	32	3.74e-13	-0.002				1.5	100.134
		2.25	33	4.089e-12	-0.001			2	84.0666		2.25	33	4.043e-12	-0.001			2	83.6887		2.25	33	7.293e-13	-0.002			2	98.781		2.25	33	3.666e-13	-0.002			2	99.9455		2.25	33	3.766e-13	-0.002				2	100.83
		2.75	34	3.758e-12	-0.001			2.5	77.2615		2.75	34	3.704e-12	-0.001			2.5	76.6715		2.75	34	7.266e-13	-0.002			2.5	98.4153		2.75	34	3.69e-13	-0.002			2.5	100.6		2.75	34	3.782e-13	-0.002				2.5	101.258
		3.25	35	3.411e-12	-0.001			3	70.1275		3.25	35	3.363e-12	-0.001			3	69.6129		3.25	35	7.218e-13	-0.002			3	97.7651		3.25	35	3.661e-13	-0.002			3	99.8092		3.25	35	3.806e-13	-0.002				3	101.901
								-0.25	0								-0.25	0								-0.25	0								-0.25	0									-0.25	0
		3.75	36	3.067e-12	-0.002			3.5	63.0551		3.75	36	3.013e-12	-0.001			3.5	62.368		3.75	36	7.104e-13	-0.002			3.5	96.221		3.75	36	3.638e-13	-0.002			3.5	99.1821		3.75	36	3.805e-13	-0.002				3.5	101.874
		4.25	37	2.71e-12	-0.002			4	55.7155		4.25	37	2.656e-12	-0.001			4	54.9783		4.25	37	6.979e-13	-0.002			4	94.528		4.25	37	3.599e-13	-0.002			4	98.1189		4.25	37	3.77e-13	-0.002				4	100.937
		4.75	38	2.355e-12	-0.002			4.5	48.4169		4.75	38	2.306e-12	-0.002			4.5	47.7334		4.75	38	6.732e-13	-0.002			4.5	91.1824		4.75	38	3.493e-13	-0.002			4.5	95.229		4.75	38	3.654e-13	-0.002				4.5	97.8313
		5.25	39	1.977e-12	-0.002			5	40.6456		5.25	39	1.939e-12	-0.002			5	40.1366		5.25	39	6.367e-13	-0.002			5	86.2387		5.25	39	3.341e-13	-0.002			5	91.0851		5.25	39	3.45e-13	-0.002				5	92.3695
		5.75	40	1.594e-12	-0.002			5.5	32.7714		5.75	40	1.565e-12	-0.002			5.5	32.3949		5.75	40	5.652e-13	-0.002			5.5	76.5542		5.75	40	2.955e-13	-0.002			5.5	80.5616		5.75	40	3.016e-13	-0.002				5.5	80.7497
								-0.25	0								-0.25	0								-0.25	0								-0.25	0									-0.25	0
		6.25	41	1.129e-12	-0.003			6	23.2113		6.25	41	1.111e-12	-0.002			6	22.9973		6.25	41	3.968e-13	-0.002			6	53.7451		6.25	41	2.095e-13	-0.003			6	57.1156		6.25	41	2.131e-13	-0.002				6	57.0549
		6.75	42	5.739e-13	-0.004			6.5	11.7989		6.75	42	5.607e-13	-0.003			6.5	11.6063		6.75	42	1.917e-13	-0.003			6.5	25.9651		6.75	42	1.058e-13	-0.004			6.5	28.8441		6.75	42	1.073e-13	-0.003				6.5	28.7282
		7.25	43	2.288e-13	-0.006			7	4.70395		7.25	43	2.237e-13	-0.005			7	4.63051		7.25	43	8.588e-14	-0.005			7	11.6321		7.25	43	4.863e-14	-0.005			7	13.2579		7.25	43	4.873e-14	-0.005				7	13.0469
		7.75	44	1.053e-13	-0.008			7.5	2.16488		7.75	44	1.023e-13	-0.008			7.5	2.11757		7.75	44	4.773e-14	-0.007			7.5	6.46485		7.75	44	2.558e-14	-0.008			7.5	6.97383		7.75	44	2.487e-14	-0.007				7.5	6.65863
		8.25	45	5.812e-14	-0.011			8	1.1949		8.25	45	5.612e-14	-0.01			8	1.16166		8.25	45	3.04e-14	-0.008			8	4.11757		8.25	45	1.536e-14	-0.01			8	4.18757		8.25	45	1.473e-14	-0.009				8	3.94378
								-0.25	0								-0.25	0								-0.25	0								-0.25	0									-0.25	0
		8.75	46	3.615e-14	-0.014			8.5	0.743215		8.75	46	3.473e-14	-0.013			8.5	0.718899		8.75	46	2.097e-14	-0.01			8.5	2.84031		8.75	46	1.086e-14	-0.011			8.5	2.96074		8.75	46	9.7e-15	-0.011				8.5	2.59705
		9.25	47	2.546e-14	-0.017			9	0.523438		9.25	47	2.445e-14	-0.015			9	0.506106		9.25	47	1.585e-14	-0.011			9	2.14682		9.25	47	8.037e-15	-0.013			9	2.19111		9.25	47	6.985e-15	-0.013				9	1.87015
		9.75	48	1.907e-14	-0.02			9.5	0.392064		9.75	48	1.899e-14	-0.017			9.5	0.393086		9.75	48	1.222e-14	-0.013			9.5	1.65515		9.75	48	6.23e-15	-0.015			9.5	1.69847		9.75	48	5.051e-15	-0.015				9.5	1.35234
		10.25	49	1.488e-14	-0.022			10	0.305921		10.25	49	1.451e-14	-0.02			10	0.300352		10.25	49	9.541e-15	-0.014			10	1.29229		10.25	49	4.671e-15	-0.017			10	1.27345		10.25	49	3.665e-15	-0.017				10	0.981258
		10.75	50	1.162e-14	-0.025			10.5	0.238898		10.75	50	1.211e-14	-0.022			10.5	0.250673		10.75	50	7.008e-15	-0.017			10.5	0.949208		10.75	50	3.547e-15	-0.02			10.5	0.967012		10.75	50	2.835e-15	-0.02				10.5	0.759036
								-0.25	0								-0.25	0								-0.25	0								-0.25	0									-0.25	0
		11.25	51	9.152e-15	-0.029			11	0.188158		11.25	51	8.861e-15	-0.025			11	0.18342		11.25	51	5.455e-15	-0.019			11	0.73886		11.25	51	2.582e-15	-0.023			11	0.703926		11.25	51	2.063e-15	-0.023				11	0.552343
		11.75	52	6.552e-15	-0.034			11.5	0.134704		11.75	52	7.226e-15	-0.028			11.5	0.149576		11.75	52	4.338e-15	-0.021			11.5	0.587566		11.75	52	2.041e-15	-0.026			11.5	0.556434		11.75	52	1.611e-15	-0.026				11.5	0.431325
		12.25	53	5.252e-15	-0.038			12	0.107977		12.25	53	5.419e-15	-0.032			12	0.112171		12.25	53	3.549e-15	-0.023			12	0.480699		12.25	53	1.562e-15	-0.03			12	0.425845		12.25	53	1.144e-15	-0.03				12	0.306292
		12.75	54	4.038e-15	-0.042			12.5	0.0830181		12.75	54	4.084e-15	-0.036			12.5	0.0845374		12.75	54	2.624e-15	-0.028			12.5	0.355411		12.75	54	1.22e-15	-0.034			12.5	0.332606		12.75	54	8.507e-16	-0.035				12.5	0.227764
		13.25	55	2.833e-15	-0.05			13	0.0582442		13.25	55	3.497e-15	-0.04			13	0.0723867		13.25	55	2.123e-15	-0.03			13	0.287552		13.25	55	9.869e-16	-0.037			13	0.269057		13.25	55	6.701e-16	-0.04				13	0.179411
								-0.25	0								-0.25	0								-0.25	0								-0.25	0									-0.25	0
		13.75	56	2.385e-15	-0.056			13.5	0.0490337		13.75	56	2.743e-15	-0.045			13.5	0.0567791		13.75	56	1.593e-15	-0.035			13.5	0.215766		13.75	56	7.543e-16	-0.042			13.5	0.205643		13.75	56	5.127e-16	-0.045				13.5	0.137269
		14.25	57	1.719e-15	-0.065			14	0.0353413		14.25	57	2.018e-15	-0.052			14	0.0417719		14.25	57	1.285e-15	-0.04			14	0.174048		14.25	57	6.043e-16	-0.047			14	0.164749		14.25	57	3.615e-16	-0.052				14	0.0967871

## Sheet: D1.7cm CR
		woCone 10x10 defined at MLC placement (~SSD 56), phatom placed at SSD60									woCone 10x10 defined at MLC placement (~SSD 56), phatom placed at SSD60									woCone 10x10 defined at MLC placement (~SSD 56), phatom placed at SSD60									woCone 10x10 defined at MLC placement (~SSD 56), phatom placed at SSD60									woCone 10x10 defined at MLC placement (~SSD 56), phatom placed at SSD60
		SFF	both Up & Down foil removed					Jaw open 20x20 SSD 100			SFF LargeJaw		both Up & Down foil removed			Jaw open 40x40 SSD 100				SFF DownfoilOnly		Up removed & Down only			Jaw open 40x40 SSD 100				SF LargeJaw		both Up & Down foil removed			Jaw open 40x40 SSD 100				SF
		DOSXYZnrc ($Revision:1.50 $) Dose outputs (dose/F, Gy.cm**2)									DOSXYZnrc ($Revision:1.50 $) Dose outputs (dose/F, Gy.cm**2)									DOSXYZnrc ($Revision:1.50 $) Dose outputs (dose/F, Gy.cm**2)									DOSXYZnrc ($Revision:1.50 $) Dose outputs (dose/F, Gy.cm**2)									DOSXYZnrc ($Revision:1.50 $) Dose outputs (dose/F, Gy.cm**2)
		for z= 1.600 to 1.800 k= 10									for z= 1.600 to 1.800 k= 10									for z= 1.600 to 1.800 k= 10									for z= 1.600 to 1.800 k= 10									for z= 1.600 to 1.800 k= 10
		ybounds: -0.250 0.250									ybounds: -0.250 0.250									ybounds: -0.250 0.250									ybounds: -0.250 0.250									ybounds: -0.250 0.250
		j= 29									j= 29									j= 29									j= 29									j= 29
		xbounds ( -14.250)						Xcenter	Dose(%)		xbounds ( -14.250)						Xcenter	Dose(%)		xbounds ( -14.250)						Xcenter	Dose(%)		xbounds ( -14.250)						Xcenter	Dose(%)		xbounds ( -14.250)							Xcenter	Dose(%)
		-13.75	1	8.366e-16	-0.089			-14	0.0170283		-13.75	1	9.748e-16	-0.071			-14	0.02		-13.75	1	5.732e-16	-0.055			-14	0.0784668		-13.75	1	9.748e-16	-0.071			-14	0.02		-13.75	1	1.618e-16	-0.075				-14	0.0461231
		-13.25	2	1.303e-15	-0.07			-13.5	0.0265215		-13.25	2	1.255e-15	-0.062			-13.5	0.0257489		-13.25	2	9.264e-16	-0.046			-13.5	0.126817		-13.25	2	1.255e-15	-0.062			-13.5	0.0257489		-13.25	2	2.48e-16	-0.063				-13.5	0.0706956
		-12.75	3	1.576e-15	-0.063			-13	0.0320782		-12.75	3	1.699e-15	-0.056			-13	0.0348584		-12.75	3	1.112e-15	-0.041			-13	0.152225		-12.75	3	1.699e-15	-0.056			-13	0.0348584		-12.75	3	2.798e-16	-0.06				-13	0.0797605
		-12.25	4	2.242e-15	-0.055			-12.5	0.045634		-12.25	4	2.108e-15	-0.05			-12.5	0.0432499		-12.25	4	1.359e-15	-0.037			-12.5	0.186037		-12.25	4	2.108e-15	-0.05			-12.5	0.0432499		-12.25	4	4.145e-16	-0.049				-12.5	0.118158
		-11.75	5	2.99e-15	-0.048			-12	0.0608589		-11.75	5	3.451e-15	-0.04			-12	0.0708043		-11.75	5	1.851e-15	-0.032			-12	0.253388		-11.75	5	3.451e-15	-0.04			-12	0.0708043		-11.75	5	5.763e-16	-0.042				-12	0.164282
								-0.25	0								-0.25	0								-0.25	0								-0.25	0									-0.25	0
		-11.25	6	4.009e-15	-0.042			-11.5	0.0815998		-11.25	6	4.129e-15	-0.035			-11.5	0.0847148		-11.25	6	2.458e-15	-0.028			-11.5	0.336482		-11.25	6	4.129e-15	-0.035			-11.5	0.0847148		-11.25	6	7.756e-16	-0.037				-11.5	0.221095
		-10.75	7	5.028e-15	-0.038			-11	0.102341		-10.75	7	5.421e-15	-0.032			-11	0.111223		-10.75	7	3.237e-15	-0.024			-11	0.443121		-10.75	7	5.421e-15	-0.032			-11	0.111223		-10.75	7	1.041e-15	-0.032				-11	0.29675
		-10.25	8	7.121e-15	-0.031			-10.5	0.144942		-10.25	8	7.143e-15	-0.028			-10.5	0.146553		-10.25	8	4.267e-15	-0.021			-10.5	0.58412		-10.25	8	7.143e-15	-0.028			-10.5	0.146553		-10.25	8	1.522e-15	-0.026				-10.5	0.433865
		-9.75	9	9.512e-15	-0.027			-10	0.193609		-9.75	9	9.821e-15	-0.024			-10	0.201498		-9.75	9	5.897e-15	-0.018			-10	0.807255		-9.75	9	9.821e-15	-0.024			-10	0.201498		-9.75	9	2.136e-15	-0.022				-10	0.608894
		-9.25	10	1.267e-14	-0.023			-9.5	0.257887		-9.25	10	1.27e-14	-0.021			-9.5	0.260566		-9.25	10	7.774e-15	-0.016			-9.5	1.0642		-9.25	10	1.27e-14	-0.021			-9.5	0.260566		-9.25	10	3.032e-15	-0.019				-9.5	0.86431
								-0.25	0								-0.25	0								-0.25	0								-0.25	0									-0.25	0
		-8.75	11	1.824e-14	-0.02			-9	0.37126		-8.75	11	1.708e-14	-0.018			-9	0.350431		-8.75	11	1.065e-14	-0.013			-9	1.45791		-8.75	11	1.708e-14	-0.018			-9	0.350431		-8.75	11	4.346e-15	-0.016				-9	1.23888
		-8.25	12	2.733e-14	-0.016			-8.5	0.556279		-8.25	12	2.639e-14	-0.014			-8.5	0.541444		-8.25	12	1.548e-14	-0.011			-8.5	2.1191		-8.25	12	2.639e-14	-0.014			-8.5	0.541444		-8.25	12	6.45e-15	-0.013				-8.5	1.83865
		-7.75	13	5.576e-14	-0.012			-8	1.13495		-7.75	13	5.45e-14	-0.01			-8	1.11818		-7.75	13	2.54e-14	-0.009			-8	3.47707		-7.75	13	5.45e-14	-0.01			-8	1.11818		-7.75	13	1.076e-14	-0.01				-8	3.06727
		-7.25	14	1.287e-13	-0.008			-7.5	2.61958		-7.25	14	1.242e-13	-0.007			-7.5	2.54822		-7.25	14	4.896e-14	-0.006			-7.5	6.70226		-7.25	14	1.242e-13	-0.007			-7.5	2.54822		-7.25	14	2.277e-14	-0.007				-7.5	6.49088
		-6.75	15	3.008e-13	-0.005			-7	6.12253		-6.75	15	2.904e-13	-0.004			-7	5.95815		-6.75	15	1.037e-13	-0.004			-7	14.1958		-6.75	15	2.904e-13	-0.004			-7	5.95815		-6.75	15	5.185e-14	-0.005				-7	14.7805
								-0.25	0								-0.25	0								-0.25	0								-0.25	0									-0.25	0
		-6.25	16	6.459e-13	-0.003			-6.5	13.1468		-6.25	16	6.316e-13	-0.003			-6.5	12.9586		-6.25	16	2.192e-13	-0.003			-6.5	30.0068		-6.25	16	6.316e-13	-0.003			-6.5	12.9586		-6.25	16	1.118e-13	-0.003				-6.5	31.87
		-5.75	17	1.125e-12	-0.002			-6	22.8984		-5.75	17	1.1e-12	-0.002			-6	22.5687		-5.75	17	3.924e-13	-0.002			-6	53.7166		-5.75	17	1.1e-12	-0.002			-6	22.5687		-5.75	17	1.968e-13	-0.002				-6	56.1003
		-5.25	18	1.564e-12	-0.002			-5.5	31.8339		-5.25	18	1.526e-12	-0.002			-5.5	31.309		-5.25	18	5.382e-13	-0.002			-5.5	73.6756		-5.25	18	1.526e-12	-0.002			-5.5	31.309		-5.25	18	2.728e-13	-0.002				-5.5	77.7651
		-4.75	19	1.945e-12	-0.002			-5	39.5888		-4.75	19	1.893e-12	-0.002			-5	38.8387		-4.75	19	6.163e-13	-0.002			-5	84.3669		-4.75	19	1.893e-12	-0.002			-5	38.8387		-4.75	19	3.171e-13	-0.002				-5	90.3934
		-4.25	20	2.314e-12	-0.002			-4.5	47.0995		-4.25	20	2.261e-12	-0.002			-4.5	46.389		-4.25	20	6.603e-13	-0.002			-4.5	90.3901		-4.25	20	2.261e-12	-0.002			-4.5	46.389		-4.25	20	3.391e-13	-0.002				-4.5	96.6648
								-0.25	0								-0.25	0								-0.25	0								-0.25	0									-0.25	0
		-3.75	21	2.685e-12	-0.002			-4	54.6509		-3.75	21	2.635e-12	-0.001			-4	54.0624		-3.75	21	6.837e-13	-0.002			-4	93.5934		-3.75	21	2.635e-12	-0.001			-4	54.0624		-3.75	21	3.511e-13	-0.002				-4	100.086
		-3.25	22	3.084e-12	-0.001			-3.5	62.7722		-3.25	22	3.034e-12	-0.001			-3.5	62.2487		-3.25	22	7.02e-13	-0.002			-3.5	96.0986		-3.25	22	3.034e-12	-0.001			-3.5	62.2487		-3.25	22	3.549e-13	-0.002				-3.5	101.169
		-2.75	23	3.47e-12	-0.001			-3	70.6289		-2.75	23	3.419e-12	-0.001			-3	70.1477		-2.75	23	7.134e-13	-0.002			-3	97.6591		-2.75	23	3.419e-12	-0.001			-3	70.1477		-2.75	23	3.572e-13	-0.002				-3	101.824
		-2.25	24	3.854e-12	-0.001			-2.5	78.4449		-2.25	24	3.807e-12	-0.001			-2.5	78.1083		-2.25	24	7.215e-13	-0.002			-2.5	98.768		-2.25	24	3.807e-12	-0.001			-2.5	78.1083		-2.25	24	3.565e-13	-0.002				-2.5	101.625
		-1.75	25	4.201e-12	-0.001			-2	85.5078		-1.75	25	4.158e-12	-0.001			-2	85.3098		-1.75	25	7.26e-13	-0.002			-2	99.384		-1.75	25	4.158e-12	-0.001			-2	85.3098		-1.75	25	3.541e-13	-0.002				-2	100.941
								-0.25	0								-0.25	0								-0.25	0								-0.25	0									-0.25	0
		-1.25	26	4.511e-12	-0.001			-1.5	91.8176		-1.25	26	4.462e-12	-0.001			-1.5	91.547		-1.25	26	7.294e-13	-0.002			-1.5	99.8494		-1.25	26	4.462e-12	-0.001			-1.5	91.547		-1.25	26	3.524e-13	-0.002				-1.5	100.456
		-0.75	27	4.728e-12	-0.001			-1	96.2345		-0.75	27	4.697e-12	-0.001			-1	96.3685		-0.75	27	7.316e-13	-0.002			-1	100.151		-0.75	27	4.697e-12	-0.001			-1	96.3685		-0.75	27	3.525e-13	-0.002				-1	100.485
		-0.25	28	4.872e-12	-0.001			-0.5	99.1655		-0.25	28	4.843e-12	-0.001			-0.5	99.364		-0.25	28	7.33e-13	-0.002			-0.5	100.342		-0.25	28	4.843e-12	-0.001			-0.5	99.364		-0.25	28	3.507e-13	-0.002				-0.5	99.9715
		0.25	29	4.913e-12	-0.001			0	100		0.25	29	4.874e-12	-0.001			0	100		0.25	29	7.305e-13	-0.002			0	100		0.25	29	4.874e-12	-0.001			0	100		0.25	29	3.508e-13	-0.002				0	100
		0.75	30	4.848e-12	-0.001			0.5	98.677		0.75	30	4.81e-12	-0.001			0.5	98.6869		0.75	30	7.314e-13	-0.002			0.5	100.123		0.75	30	4.81e-12	-0.001			0.5	98.6869		0.75	30	3.508e-13	-0.002				0.5	100
								-0.25	0								-0.25	0								-0.25	0								-0.25	0									-0.25	0
		1.25	31	4.695e-12	-0.001			1	95.5628		1.25	31	4.651e-12	-0.001			1	95.4247		1.25	31	7.264e-13	-0.002			1	99.4387		1.25	31	4.651e-12	-0.001			1	95.4247		1.25	31	3.508e-13	-0.002				1	100
		1.75	32	4.449e-12	-0.001			1.5	90.5557		1.75	32	4.417e-12	-0.001			1.5	90.6237		1.75	32	7.263e-13	-0.002			1.5	99.4251		1.75	32	4.417e-12	-0.001			1.5	90.6237		1.75	32	3.532e-13	-0.002				1.5	100.684
		2.25	33	4.146e-12	-0.001			2	84.3884		2.25	33	4.105e-12	-0.001			2	84.2224		2.25	33	7.252e-13	-0.002			2	99.2745		2.25	33	4.105e-12	-0.001			2	84.2224		2.25	33	3.54e-13	-0.002				2	100.912
		2.75	34	3.808e-12	-0.001			2.5	77.5087		2.75	34	3.763e-12	-0.001			2.5	77.2056		2.75	34	7.221e-13	-0.002			2.5	98.8501		2.75	34	3.763e-12	-0.001			2.5	77.2056		2.75	34	3.556e-13	-0.002				2.5	101.368
		3.25	35	3.469e-12	-0.001			3	70.6086		3.25	35	3.424e-12	-0.001			3	70.2503		3.25	35	7.141e-13	-0.002			3	97.755		3.25	35	3.424e-12	-0.001			3	70.2503		3.25	35	3.583e-13	-0.002				3	102.138
								-0.25	0								-0.25	0								-0.25	0								-0.25	0									-0.25	0
		3.75	36	3.114e-12	-0.001			3.5	63.3829		3.75	36	3.067e-12	-0.001			3.5	62.9257		3.75	36	7.069e-13	-0.002			3.5	96.7693		3.75	36	3.067e-12	-0.001			3.5	62.9257		3.75	36	3.577e-13	-0.002				3.5	101.967
		4.25	37	2.762e-12	-0.002			4	56.2182		4.25	37	2.704e-12	-0.001			4	55.478		4.25	37	6.886e-13	-0.002			4	94.2642		4.25	37	2.704e-12	-0.001			4	55.478		4.25	37	3.539e-13	-0.002				4	100.884
		4.75	38	2.39e-12	-0.002			4.5	48.6464		4.75	38	2.339e-12	-0.002			4.5	47.9893		4.75	38	6.651e-13	-0.002			4.5	91.0472		4.75	38	2.339e-12	-0.002			4.5	47.9893		4.75	38	3.434e-13	-0.002				4.5	97.8905
		5.25	39	2.007e-12	-0.002			5	40.8508		5.25	39	1.966e-12	-0.002			5	40.3365		5.25	39	6.204e-13	-0.002			5	84.9281		5.25	39	1.966e-12	-0.002			5	40.3365		5.25	39	3.196e-13	-0.002				5	91.106
		5.75	40	1.606e-12	-0.002			5.5	32.6888		5.75	40	1.575e-12	-0.002			5.5	32.3143		5.75	40	5.392e-13	-0.002			5.5	73.8125		5.75	40	1.575e-12	-0.002			5.5	32.3143		5.75	40	2.75e-13	-0.002				5.5	78.3922
								-0.25	0								-0.25	0								-0.25	0								-0.25	0									-0.25	0
		6.25	41	1.153e-12	-0.002			6	23.4683		6.25	41	1.128e-12	-0.002			6	23.1432		6.25	41	3.918e-13	-0.002			6	53.6345		6.25	41	1.128e-12	-0.002			6	23.1432		6.25	41	1.985e-13	-0.002				6	56.5849
		6.75	42	6.603e-13	-0.003			6.5	13.4399		6.75	42	6.467e-13	-0.003			6.5	13.2684		6.75	42	2.195e-13	-0.003			6.5	30.0479		6.75	42	6.467e-13	-0.003			6.5	13.2684		6.75	42	1.114e-13	-0.003				6.5	31.756
		7.25	43	3.052e-13	-0.005			7	6.21209		7.25	43	2.957e-13	-0.004			7	6.06689		7.25	43	1.029e-13	-0.004			7	14.0862		7.25	43	2.957e-13	-0.004			7	6.06689		7.25	43	5.227e-14	-0.005				7	14.9002
		7.75	44	1.283e-13	-0.008			7.5	2.61144		7.75	44	1.259e-13	-0.007			7.5	2.58309		7.75	44	4.896e-14	-0.006			7.5	6.70226		7.75	44	1.259e-13	-0.007			7.5	2.58309		7.75	44	2.305e-14	-0.007				7.5	6.5707
		8.25	45	5.699e-14	-0.011			8	1.15998		8.25	45	5.466e-14	-0.01			8	1.12146		8.25	45	2.52e-14	-0.009			8	3.44969		8.25	45	5.466e-14	-0.01			8	1.12146		8.25	45	1.087e-14	-0.01				8	3.09863
								-0.25	0								-0.25	0								-0.25	0								-0.25	0									-0.25	0
		8.75	46	2.749e-14	-0.016			8.5	0.559536		8.75	46	2.719e-14	-0.014			8.5	0.557858		8.75	46	1.538e-14	-0.011			8.5	2.10541		8.75	46	2.719e-14	-0.014			8.5	0.557858		8.75	46	6.428e-15	-0.013				8.5	1.83238
		9.25	47	1.758e-14	-0.02			9	0.357826		9.25	47	1.714e-14	-0.018			9	0.351662		9.25	47	1.083e-14	-0.013			9	1.48255		9.25	47	1.714e-14	-0.018			9	0.351662		9.25	47	4.373e-15	-0.016				9	1.24658
		9.75	48	1.269e-14	-0.024			9.5	0.258294		9.75	48	1.248e-14	-0.021			9.5	0.256053		9.75	48	8.078e-15	-0.015			9.5	1.10582		9.75	48	1.248e-14	-0.021			9.5	0.256053		9.75	48	2.961e-15	-0.019				9.5	0.844071
		10.25	49	9.653e-15	-0.027			10	0.196479		10.25	49	9.574e-15	-0.024			10	0.19643		10.25	49	6.105e-15	-0.018			10	0.835729		10.25	49	9.574e-15	-0.024			10	0.19643		10.25	49	2.123e-15	-0.022				10	0.605188
		10.75	50	7.227e-15	-0.032			10.5	0.1471		10.75	50	7.267e-15	-0.028			10.5	0.149097		10.75	50	4.39e-15	-0.021			10.5	0.600958		10.75	50	7.267e-15	-0.028			10.5	0.149097		10.75	50	1.434e-15	-0.027				10.5	0.40878
								-0.25	0								-0.25	0								-0.25	0								-0.25	0									-0.25	0
		11.25	51	5.158e-15	-0.037			11	0.104987		11.25	51	5.177e-15	-0.032			11	0.106217		11.25	51	3.252e-15	-0.024			11	0.445175		11.25	51	5.177e-15	-0.032			11	0.106217		11.25	51	1.118e-15	-0.031				11	0.3187
		11.75	52	3.904e-15	-0.042			11.5	0.0794627		11.75	52	4.22e-15	-0.036			11.5	0.0865819		11.75	52	2.482e-15	-0.028			11.5	0.339767		11.75	52	4.22e-15	-0.036			11.5	0.0865819		11.75	52	8.426e-16	-0.036				11.5	0.240194
		12.25	53	2.853e-15	-0.049			12	0.0580704		12.25	53	3.221e-15	-0.041			12	0.0660854		12.25	53	1.875e-15	-0.032			12	0.256674		12.25	53	3.221e-15	-0.041			12	0.0660854		12.25	53	5.553e-16	-0.042				12	0.158295
		12.75	54	2.209e-15	-0.055			12.5	0.0449623		12.75	54	2.187e-15	-0.049			12.5	0.0448707		12.75	54	1.461e-15	-0.036			12.5	0.2		12.75	54	2.187e-15	-0.049			12.5	0.0448707		12.75	54	3.891e-16	-0.049				12.5	0.110918
		13.25	55	1.483e-15	-0.068			13	0.0301852		13.25	55	1.654e-15	-0.056			13	0.0339352		13.25	55	1.148e-15	-0.04			13	0.157153		13.25	55	1.654e-15	-0.056			13	0.0339352		13.25	55	3.137e-16	-0.056				13	0.0894242
								-0.25	0								-0.25	0								-0.25	0								-0.25	0									-0.25	0
		13.75	56	1.184e-15	-0.074			13.5	0.0240993		13.75	56	1.332e-15	-0.062			13.5	0.0273287		13.75	56	8.004e-16	-0.047			13.5	0.109569		13.75	56	1.332e-15	-0.062			13.5	0.0273287		13.75	56	2.585e-16	-0.062				13.5	0.0736887
		14.25	57	9.467e-16	-0.083			14	0.0192693		14.25	57	9.104e-16	-0.071			14	0.0186787		14.25	57	5.258e-16	-0.056			14	0.0719781		14.25	57	9.104e-16	-0.071			14	0.0186787		14.25	57	1.67e-16	-0.074				14	0.0476055

## Sheet: D1.9cm CR
		woCone 10x10 defined at MLC placement (~SSD 56), phatom placed at SSD60									woCone 10x10 defined at MLC placement (~SSD 56), phatom placed at SSD60									woCone 10x10 defined at MLC placement (~SSD 56), phatom placed at SSD60									woCone 10x10 defined at MLC placement (~SSD 56), phatom placed at SSD60									woCone 10x10 defined at MLC placement (~SSD 56), phatom placed at SSD60
		SFF	both Up & Down foil removed					Jaw open 20x20 SSD 100			SFF LargeJaw		both Up & Down foil removed			Jaw open 40x40 SSD 100				SFF DownfoilOnly		Up removed & Down only			Jaw open 40x40 SSD 100				SF LargeJaw		both Up & Down foil removed			Jaw open 40x40 SSD 100				SF
		DOSXYZnrc ($Revision:1.50 $) Dose outputs (dose/F, Gy.cm**2)									DOSXYZnrc ($Revision:1.50 $) Dose outputs (dose/F, Gy.cm**2)									DOSXYZnrc ($Revision:1.50 $) Dose outputs (dose/F, Gy.cm**2)									DOSXYZnrc ($Revision:1.50 $) Dose outputs (dose/F, Gy.cm**2)									DOSXYZnrc ($Revision:1.50 $) Dose outputs (dose/F, Gy.cm**2)
		for z= 1.800 to 2.000 k= 11									for z= 1.800 to 2.000 k= 11									for z= 1.800 to 2.000 k= 11									for z= 1.800 to 2.000 k= 11									for z= 1.800 to 2.000 k= 11
		ybounds: -0.250 0.250									ybounds: -0.250 0.250									ybounds: -0.250 0.250									ybounds: -0.250 0.250									ybounds: -0.250 0.250
		j= 29									j= 29									j= 29									j= 29									j= 29
		xbounds ( -14.250)						Xcenter	Dose(%)		xbounds ( -14.250)						Xcenter	Dose(%)		xbounds ( -14.250)						Xcenter	Dose(%)		xbounds ( -14.250)						Xcenter	Dose(%)		xbounds ( -14.250)							Xcenter	Dose(%)
		-13.75	1	6.352e-16	-0.105			-14	0.0133895		-13.75	1	7.213e-16	-0.08			-14	0.0152947		-13.75	1	3.865e-16	-0.065			-14	0.0554997		-13.75	1	1.456e-16	-0.09			-14	0.046877		-13.75	1	9.285e-17	-0.091				-14	0.0292257
		-13.25	2	9.268e-16	-0.086			-13.5	0.0195363		-13.25	2	9.694e-16	-0.071			-13.5	0.0205556		-13.25	2	5.916e-16	-0.056			-13.5	0.0849512		-13.25	2	2.131e-16	-0.075			-13.5	0.0686091		-13.25	2	1.394e-16	-0.085				-13.5	0.0438779
		-12.75	3	1.1e-15	-0.075			-13	0.0231872		-12.75	3	1.162e-15	-0.065			-13	0.0246395		-12.75	3	7.199e-16	-0.051			-13	0.103374		-12.75	3	2.835e-16	-0.066			-13	0.091275		-12.75	3	1.88e-16	-0.071				-13	0.0591753
		-12.25	4	1.653e-15	-0.064			-12.5	0.034844		-12.25	4	1.517e-15	-0.058			-12.5	0.0321671		-12.25	4	9.172e-16	-0.044			-12.5	0.131706		-12.25	4	3.657e-16	-0.059			-12.5	0.11774		-12.25	4	2.73e-16	-0.06				-12.5	0.0859301
		-11.75	5	2.092e-15	-0.057			-12	0.0440978		-11.75	5	2.21e-15	-0.048			-12	0.0468617		-11.75	5	1.255e-15	-0.039			-12	0.180213		-11.75	5	4.913e-16	-0.051			-12	0.158178		-11.75	5	3.53e-16	-0.053				-12	0.111111
								-0.25	0								-0.25	0								-0.25	0								-0.25	0									-0.25	0
		-11.25	6	2.73e-15	-0.05			-11.5	0.0575464		-11.25	6	2.946e-15	-0.042			-11.5	0.0624682		-11.25	6	1.707e-15	-0.033			-11.5	0.245118		-11.25	6	5.814e-16	-0.046			-11.5	0.187186		-11.25	6	5.031e-16	-0.044				-11.5	0.158357
		-10.75	7	3.703e-15	-0.042			-11	0.0780565		-10.75	7	3.858e-15	-0.038			-11	0.0818066		-10.75	7	2.251e-15	-0.028			-11	0.323234		-10.75	7	8.081e-16	-0.039			-11	0.260174		-10.75	7	6.557e-16	-0.039				-11	0.20639
		-10.25	8	5.287e-15	-0.036			-10.5	0.111446		-10.25	8	5.357e-15	-0.032			-10.5	0.113592		-10.25	8	3.035e-15	-0.025			-10.5	0.435813		-10.25	8	1.186e-15	-0.033			-10.5	0.381842		-10.25	8	1.03e-15	-0.032				-10.5	0.324205
		-9.75	9	6.918e-15	-0.032			-10	0.145826		-9.75	9	7.396e-15	-0.027			-10	0.156828		-9.75	9	4.218e-15	-0.021			-10	0.605686		-9.75	9	1.676e-15	-0.028			-10	0.539601		-9.75	9	1.463e-15	-0.027				-10	0.460497
		-9.25	10	9.847e-15	-0.026			-9.5	0.207567		-9.25	10	9.608e-15	-0.024			-9.5	0.203732		-9.25	10	5.899e-15	-0.018			-9.5	0.847071		-9.25	10	2.441e-15	-0.024			-9.5	0.785898		-9.25	10	2.143e-15	-0.022				-9.5	0.674536
								-0.25	0								-0.25	0								-0.25	0								-0.25	0									-0.25	0
		-8.75	11	1.413e-14	-0.022			-9	0.29785		-8.75	11	1.375e-14	-0.02			-9	0.291561		-8.75	11	8.112e-15	-0.015			-9	1.16485		-8.75	11	3.359e-15	-0.02			-9	1.08146		-8.75	11	3.088e-15	-0.019				-9	0.971986
		-8.25	12	2.301e-14	-0.018			-8.5	0.485034		-8.25	12	2.163e-14	-0.016			-8.5	0.458651		-8.25	12	1.213e-14	-0.013			-8.5	1.74182		-8.25	12	4.894e-15	-0.017			-8.5	1.57566		-8.25	12	4.728e-15	-0.015				-8.5	1.4882
		-7.75	13	5.049e-14	-0.012			-8	1.06429		-7.75	13	5.022e-14	-0.011			-8	1.06489		-7.75	13	2.13e-14	-0.01			-8	3.05859		-7.75	13	8.499e-15	-0.013			-8	2.73632		-7.75	13	8.376e-15	-0.011				-8	2.63645
		-7.25	14	1.291e-13	-0.008			-7.5	2.72133		-7.25	14	1.272e-13	-0.007			-7.5	2.6972		-7.25	14	4.652e-14	-0.007			-7.5	6.68007		-7.25	14	1.896e-14	-0.009			-7.5	6.10431		-7.25	14	1.931e-14	-0.008				-7.5	6.07806
		-6.75	15	3.086e-13	-0.005			-7	6.50506		-6.75	15	2.961e-13	-0.004			-7	6.27863		-6.75	15	1.032e-13	-0.004			-7	14.8191		-6.75	15	4.64e-14	-0.006			-7	14.9388		-6.75	15	4.763e-14	-0.005				-7	14.9921
								-0.25	0								-0.25	0								-0.25	0								-0.25	0									-0.25	0
		-6.25	16	6.387e-13	-0.003			-6.5	13.4633		-6.25	16	6.235e-13	-0.003			-6.5	13.2209		-6.25	16	2.147e-13	-0.003			-6.5	30.83		-6.25	16	9.943e-14	-0.004			-6.5	32.0122		-6.25	16	1.018e-13	-0.003				-6.5	32.0428
		-5.75	17	1.077e-12	-0.003			-6	22.7024		-5.75	17	1.053e-12	-0.002			-6	22.3282		-5.75	17	3.708e-13	-0.002			-6	53.2453		-5.75	17	1.73e-13	-0.003			-6	55.6986		-5.75	17	1.768e-13	-0.002				-6	55.65
		-5.25	18	1.499e-12	-0.002			-5.5	31.5978		-5.25	18	1.458e-12	-0.002			-5.5	30.916		-5.25	18	5.044e-13	-0.002			-5.5	72.4296		-5.25	18	2.372e-13	-0.002			-5.5	76.3683		-5.25	18	2.433e-13	-0.002				-5.5	76.5817
		-4.75	19	1.875e-12	-0.002			-5	39.5236		-4.75	19	1.827e-12	-0.002			-5	38.7405		-4.75	19	5.817e-13	-0.002			-5	83.5296		-4.75	19	2.738e-13	-0.002			-5	88.152		-4.75	19	2.859e-13	-0.002				-5	89.9906
		-4.25	20	2.233e-12	-0.002			-4.5	47.07		-4.25	20	2.185e-12	-0.002			-4.5	46.3316		-4.25	20	6.269e-13	-0.002			-4.5	90.0201		-4.25	20	2.948e-13	-0.002			-4.5	94.9131		-4.25	20	3.077e-13	-0.002				-4.5	96.8524
								-0.25	0								-0.25	0								-0.25	0								-0.25	0									-0.25	0
		-3.75	21	2.597e-12	-0.002			-4	54.7428		-3.75	21	2.548e-12	-0.001			-4	54.0288		-3.75	21	6.524e-13	-0.002			-4	93.6818		-3.75	21	3.026e-13	-0.002			-4	97.4243		-3.75	21	3.19e-13	-0.002				-4	100.409
		-3.25	22	2.981e-12	-0.002			-3.5	62.8373		-3.25	22	2.93e-12	-0.001			-3.5	62.1289		-3.25	22	6.678e-13	-0.002			-3.5	95.8932		-3.25	22	3.08e-13	-0.002			-3.5	99.1629		-3.25	22	3.222e-13	-0.002				-3.5	101.416
		-2.75	23	3.35e-12	-0.001			-3	70.6155		-2.75	23	3.309e-12	-0.001			-3	70.1654		-2.75	23	6.782e-13	-0.002			-3	97.3866		-2.75	23	3.092e-13	-0.002			-3	99.5493		-2.75	23	3.239e-13	-0.002				-3	101.952
		-2.25	24	3.733e-12	-0.001			-2.5	78.6889		-2.25	24	3.686e-12	-0.001			-2.5	78.1595		-2.25	24	6.867e-13	-0.002			-2.5	98.6071		-2.25	24	3.117e-13	-0.002			-2.5	100.354		-2.25	24	3.238e-13	-0.002				-2.5	101.92
		-1.75	25	4.064e-12	-0.001			-2	85.6661		-1.75	25	4.014e-12	-0.001			-2	85.1145		-1.75	25	6.909e-13	-0.002			-2	99.2102		-1.75	25	3.113e-13	-0.002			-2	100.225		-1.75	25	3.221e-13	-0.002				-2	101.385
								-0.25	0								-0.25	0								-0.25	0								-0.25	0									-0.25	0
		-1.25	26	4.359e-12	-0.001			-1.5	91.8845		-1.25	26	4.315e-12	-0.001			-1.5	91.497		-1.25	26	6.942e-13	-0.002			-1.5	99.6841		-1.25	26	3.111e-13	-0.002			-1.5	100.161		-1.25	26	3.195e-13	-0.002				-1.5	100.567
		-0.75	27	4.578e-12	-0.001			-1	96.5008		-0.75	27	4.535e-12	-0.001			-1	96.162		-0.75	27	6.944e-13	-0.002			-1	99.7128		-0.75	27	3.12e-13	-0.002			-1	100.451		-0.75	27	3.193e-13	-0.002				-1	100.504
		-0.25	28	4.709e-12	-0.001			-0.5	99.2622		-0.25	28	4.676e-12	-0.001			-0.5	99.1518		-0.25	28	6.98e-13	-0.002			-0.5	100.23		-0.25	28	3.111e-13	-0.002			-0.5	100.161		-0.25	28	3.174e-13	-0.002				-0.5	99.9056
		0.25	29	4.744e-12	-0.001			0	100		0.25	29	4.716e-12	-0.001			0	100		0.25	29	6.964e-13	-0.002			0	100		0.25	29	3.106e-13	-0.002			0	100		0.25	29	3.177e-13	-0.002				0	100
		0.75	30	4.687e-12	-0.001			0.5	98.7985		0.75	30	4.65e-12	-0.001			0.5	98.6005		0.75	30	6.967e-13	-0.002			0.5	100.043		0.75	30	3.097e-13	-0.002			0.5	99.7102		0.75	30	3.177e-13	-0.002				0.5	100
								-0.25	0								-0.25	0								-0.25	0								-0.25	0									-0.25	0
		1.25	31	4.526e-12	-0.001			1	95.4047		1.25	31	4.49e-12	-0.001			1	95.2078		1.25	31	6.921e-13	-0.002			1	99.3825		1.25	31	3.101e-13	-0.002			1	99.839		1.25	31	3.184e-13	-0.002				1	100.22
		1.75	32	4.295e-12	-0.001			1.5	90.5354		1.75	32	4.269e-12	-0.001			1.5	90.5216		1.75	32	6.925e-13	-0.002			1.5	99.44		1.75	32	3.111e-13	-0.002			1.5	100.161		1.75	32	3.2e-13	-0.002				1.5	100.724
		2.25	33	4.007e-12	-0.001			2	84.4646		2.25	33	3.976e-12	-0.001			2	84.3087		2.25	33	6.899e-13	-0.002			2	99.0666		2.25	33	3.105e-13	-0.002			2	99.9678		2.25	33	3.214e-13	-0.002				2	101.165
		2.75	34	3.686e-12	-0.001			2.5	77.6981		2.75	34	3.649e-12	-0.001			2.5	77.3749		2.75	34	6.865e-13	-0.002			2.5	98.5784		2.75	34	3.121e-13	-0.002			2.5	100.483		2.75	34	3.232e-13	-0.002				2.5	101.731
		3.25	35	3.351e-12	-0.001			3	70.6366		3.25	35	3.317e-12	-0.001			3	70.335		3.25	35	6.801e-13	-0.002			3	97.6594		3.25	35	3.102e-13	-0.002			3	99.8712		3.25	35	3.25e-13	-0.002				3	102.298
								-0.25	0								-0.25	0								-0.25	0								-0.25	0									-0.25	0
		3.75	36	3.009e-12	-0.002			3.5	63.4275		3.75	36	2.965e-12	-0.001			3.5	62.8711		3.75	36	6.73e-13	-0.002			3.5	96.6399		3.75	36	3.09e-13	-0.002			3.5	99.4849		3.75	36	3.245e-13	-0.002				3.5	102.14
		4.25	37	2.661e-12	-0.002			4	56.0919		4.25	37	2.615e-12	-0.001			4	55.4495		4.25	37	6.564e-13	-0.002			4	94.2562		4.25	37	3.05e-13	-0.002			4	98.197		4.25	37	3.21e-13	-0.002				4	101.039
		4.75	38	2.3e-12	-0.002			4.5	48.4823		4.75	38	2.261e-12	-0.002			4.5	47.9432		4.75	38	6.307e-13	-0.002			4.5	90.5658		4.75	38	2.954e-13	-0.002			4.5	95.1062		4.75	38	3.107e-13	-0.002				4.5	97.7967
		5.25	39	1.931e-12	-0.002			5	40.704		5.25	39	1.892e-12	-0.002			5	40.1187		5.25	39	5.865e-13	-0.002			5	84.2188		5.25	39	2.768e-13	-0.002			5	89.1178		5.25	39	2.883e-13	-0.002				5	90.746
		5.75	40	1.537e-12	-0.002			5.5	32.3988		5.75	40	1.508e-12	-0.002			5.5	31.9763		5.75	40	5.025e-13	-0.002			5.5	72.1568		5.75	40	2.369e-13	-0.002			5.5	76.2717		5.75	40	2.455e-13	-0.002				5.5	77.2742
								-0.25	0								-0.25	0								-0.25	0								-0.25	0									-0.25	0
		6.25	41	1.1e-12	-0.003			6	23.1872		6.25	41	1.082e-12	-0.002			6	22.9432		6.25	41	3.689e-13	-0.002			6	52.9724		6.25	41	1.735e-13	-0.003			6	55.8596		6.25	41	1.782e-13	-0.002				6	56.0907
		6.75	42	6.522e-13	-0.003			6.5	13.7479		6.75	42	6.422e-13	-0.003			6.5	13.6175		6.75	42	2.155e-13	-0.003			6.5	30.9449		6.75	42	1.003e-13	-0.004			6.5	32.2923		6.75	42	1.025e-13	-0.003				6.5	32.2631
		7.25	43	3.143e-13	-0.005			7	6.62521		7.25	43	3.048e-13	-0.004			7	6.4631		7.25	43	1.035e-13	-0.004			7	14.8621		7.25	43	4.693e-14	-0.006			7	15.1095		7.25	43	4.783e-14	-0.005				7	15.0551
		7.75	44	1.315e-13	-0.008			7.5	2.77192		7.75	44	1.273e-13	-0.007			7.5	2.69932		7.75	44	4.672e-14	-0.007			7.5	6.70879		7.75	44	1.927e-14	-0.009			7.5	6.20412		7.75	44	1.952e-14	-0.008				7.5	6.14416
		8.25	45	5.292e-14	-0.012			8	1.11551		8.25	45	4.994e-14	-0.011			8	1.05895		8.25	45	2.129e-14	-0.01			8	3.05715		8.25	45	8.66e-15	-0.013			8	2.78815		8.25	45	8.447e-15	-0.011				8	2.6588
								-0.25	0								-0.25	0								-0.25	0								-0.25	0									-0.25	0
		8.75	46	2.252e-14	-0.018			8.5	0.474705		8.75	46	2.216e-14	-0.016			8.5	0.46989		8.75	46	1.187e-14	-0.013			8.5	1.70448		8.75	46	4.93e-15	-0.017			8.5	1.58725		8.75	46	4.725e-15	-0.015				8.5	1.48725
		9.25	47	1.383e-14	-0.022			9	0.291526		9.25	47	1.317e-14	-0.02			9	0.279262		9.25	47	8.215e-15	-0.015			9	1.17964		9.25	47	3.379e-15	-0.02			9	1.08789		9.25	47	3.149e-15	-0.018				9	0.991187
		9.75	48	9.815e-15	-0.027			9.5	0.206893		9.75	48	9.044e-15	-0.024			9.5	0.191773		9.75	48	6.034e-15	-0.018			9.5	0.866456		9.75	48	2.513e-15	-0.023			9.5	0.809079		9.75	48	2.113e-15	-0.022				9.5	0.665093
		10.25	49	7.17e-15	-0.031			10	0.151138		10.25	49	7.078e-15	-0.028			10	0.150085		10.25	49	4.423e-15	-0.021			10	0.635123		10.25	49	1.753e-15	-0.027			10	0.564392		10.25	49	1.443e-15	-0.027				10	0.454202
		10.75	50	4.991e-15	-0.037			10.5	0.105207		10.75	50	5.086e-15	-0.032			10.5	0.107846		10.75	50	3.212e-15	-0.024			10.5	0.461229		10.75	50	1.135e-15	-0.033			10.5	0.365422		10.75	50	9.761e-16	-0.032				10.5	0.30724
								-0.25	0								-0.25	0								-0.25	0								-0.25	0									-0.25	0
		11.25	51	3.782e-15	-0.042			11	0.0797218		11.25	51	3.725e-15	-0.038			11	0.0789864		11.25	51	2.252e-15	-0.029			11	0.323377		11.25	51	8.809e-16	-0.038			11	0.283612		11.25	51	7.09e-16	-0.038				11	0.223167
		11.75	52	2.602e-15	-0.051			11.5	0.0548482		11.75	52	2.823e-15	-0.043			11.5	0.0598601		11.75	52	1.692e-15	-0.033			11.5	0.242964		11.75	52	5.838e-16	-0.045			11.5	0.187959		11.75	52	5.041e-16	-0.045				11.5	0.158672
		12.25	53	2.247e-15	-0.057			12	0.0473651		12.25	53	2.026e-15	-0.049			12	0.0429601		12.25	53	1.155e-15	-0.039			12	0.165853		12.25	53	4.439e-16	-0.052			12	0.142917		12.25	53	3.81e-16	-0.051				12	0.119924
		12.75	54	1.609e-15	-0.065			12.5	0.0339165		12.75	54	1.457e-15	-0.057			12.5	0.0308948		12.75	54	9.237e-16	-0.044			12.5	0.132639		12.75	54	3.727e-16	-0.058			12.5	0.119994		12.75	54	2.54e-16	-0.06				12.5	0.0799496
		13.25	55	9.933e-16	-0.086			13	0.020938		13.25	55	1.022e-15	-0.067			13	0.0216709		13.25	55	7.319e-16	-0.048			13	0.105098		13.25	55	2.616e-16	-0.068			13	0.0842241		13.25	55	1.897e-16	-0.067				13	0.0597104
								-0.25	0								-0.25	0								-0.25	0								-0.25	0									-0.25	0
		13.75	56	7.406e-16	-0.09			13.5	0.0156113		13.75	56	8.941e-16	-0.074			13.5	0.0189589		13.75	56	5.593e-16	-0.057			13.5	0.080313		13.75	56	1.971e-16	-0.076			13.5	0.0634578		13.75	56	1.65e-16	-0.076				13.5	0.0519358
		14.25	57	5.804e-16	-0.096			14	0.0122344		14.25	57	6.122e-16	-0.088			14	0.0129813		14.25	57	4.209e-16	-0.065			14	0.0604394		14.25	57	1.53e-16	-0.093			14	0.0492595		14.25	57	1.048e-16	-0.087				14	0.0329871

## Sheet: D2.2cm CR
		woCone 10x10 defined at MLC placement (~SSD 56), phatom placed at SSD60									woCone 10x10 defined at MLC placement (~SSD 56), phatom placed at SSD60									woCone 10x10 defined at MLC placement (~SSD 56), phatom placed at SSD60									woCone 10x10 defined at MLC placement (~SSD 56), phatom placed at SSD60									woCone 10x10 defined at MLC placement (~SSD 56), phatom placed at SSD60
		SFF	both Up & Down foil removed					Jaw open 20x20 SSD 100			SFF LargeJaw		both Up & Down foil removed			Jaw open 40x40 SSD 100				SFF DownfoilOnly		Up removed & Down only			Jaw open 40x40 SSD 100				SF LargeJaw		both Up & Down foil removed			Jaw open 40x40 SSD 100				SF
		DOSXYZnrc ($Revision:1.50 $) Dose outputs (dose/F, Gy.cm**2)									DOSXYZnrc ($Revision:1.50 $) Dose outputs (dose/F, Gy.cm**2)									DOSXYZnrc ($Revision:1.50 $) Dose outputs (dose/F, Gy.cm**2)									DOSXYZnrc ($Revision:1.50 $) Dose outputs (dose/F, Gy.cm**2)									DOSXYZnrc ($Revision:1.50 $) Dose outputs (dose/F, Gy.cm**2)
		for z= 2.100 to 2.300 k= 13									for z= 2.100 to 2.300 k= 13									for z= 2.100 to 2.300 k= 13									for z= 2.100 to 2.300 k= 13									for z= 2.100 to 2.300 k= 13
		ybounds: -0.250 0.250									ybounds: -0.250 0.250									ybounds: -0.250 0.250									ybounds: -0.250 0.250									ybounds: -0.250 0.250
		j= 29									j= 29									j= 29									j= 29									j= 29
		xbounds ( -14.250)						Xcenter	Dose(%)		xbounds ( -14.250)						Xcenter	Dose(%)		xbounds ( -14.250)						Xcenter	Dose(%)		xbounds ( -14.250)						Xcenter	Dose(%)		xbounds ( -14.250)							Xcenter	Dose(%)
		-13.75	1	3.084e-16	-0.134			-14	0.00733064		-13.75	1	2.798e-16	-0.121			-14	0.00669378		-13.75	1	1.812e-16	-0.085			-14	0.0303467		-13.75	1	8.456e-17	-0.11			-14	0.0356192		-13.75	1	6.397e-17	-0.102				-14	0.026228
		-13.25	2	3.94e-16	-0.122			-13.5	0.00936534		-13.25	2	4.559e-16	-0.095			-13.5	0.0109067		-13.25	2	3.113e-16	-0.075			-13.5	0.0521353		-13.25	2	1.135e-16	-0.085			-13.5	0.0478096		-13.25	2	7.567e-17	-0.1				-13.5	0.031025
		-12.75	3	4.893e-16	-0.101			-13	0.0116306		-12.75	3	5.91e-16	-0.089			-13	0.0141388		-12.75	3	3.27e-16	-0.068			-13	0.0547647		-12.75	3	1.146e-16	-0.094			-13	0.048273		-12.75	3	9.642e-17	-0.094				-13	0.0395326
		-12.25	4	8.667e-16	-0.084			-12.5	0.0206014		-12.25	4	8.262e-16	-0.076			-12.5	0.0197656		-12.25	4	4.423e-16	-0.06			-12.5	0.0740747		-12.25	4	1.619e-16	-0.081			-12.5	0.0681971		-12.25	4	1.117e-16	-0.085				-12.5	0.0457975
		-11.75	5	1.043e-15	-0.078			-12	0.024792		-11.75	5	1.087e-15	-0.066			-12	0.0260048		-11.75	5	6.021e-16	-0.052			-12	0.100837		-11.75	5	2.273e-16	-0.069			-12	0.0957456		-11.75	5	1.706e-16	-0.07				-12	0.0699467
								-0.25	0								-0.25	0								-0.25	0								-0.25	0									-0.25	0
		-11.25	6	1.601e-15	-0.063			-11.5	0.0380556		-11.25	6	1.618e-15	-0.057			-11.5	0.0387081		-11.25	6	8.589e-16	-0.045			-11.5	0.143845		-11.25	6	2.98e-16	-0.065			-11.5	0.125527		-11.25	6	1.96e-16	-0.065				-11.5	0.0803608
		-10.75	7	1.899e-15	-0.058			-11	0.0451391		-10.75	7	2.108e-15	-0.049			-11	0.0504306		-10.75	7	1.205e-15	-0.038			-11	0.201809		-10.75	7	3.99e-16	-0.054			-11	0.168071		-10.75	7	2.785e-16	-0.056				-11	0.114186
		-10.25	8	2.81e-15	-0.048			-10.5	0.0667934		-10.25	8	2.939e-15	-0.042			-10.5	0.070311		-10.25	8	1.636e-15	-0.033			-10.5	0.273991		-10.25	8	5.408e-16	-0.048			-10.5	0.227801		-10.25	8	4.663e-16	-0.046				-10.5	0.191185
		-9.75	9	4.059e-15	-0.041			-10	0.0964821		-9.75	9	3.99e-15	-0.036			-10	0.0954545		-9.75	9	2.403e-15	-0.028			-10	0.402445		-9.75	9	8.345e-16	-0.039			-10	0.351516		-9.75	9	6.493e-16	-0.038				-10	0.266216
		-9.25	10	5.598e-15	-0.035			-9.5	0.133064		-9.25	10	5.493e-15	-0.031			-9.5	0.131411		-9.25	10	3.299e-15	-0.023			-9.5	0.552504		-9.25	10	1.102e-15	-0.034			-9.5	0.464195		-9.25	10	1.021e-15	-0.032				-9.5	0.418614
								-0.25	0								-0.25	0								-0.25	0								-0.25	0									-0.25	0
		-8.75	11	8.243e-15	-0.029			-9	0.195935		-8.75	11	8.254e-15	-0.025			-9	0.197464		-8.75	11	4.63e-15	-0.02			-9	0.775415		-8.75	11	1.626e-15	-0.028			-9	0.68492		-8.75	11	1.562e-15	-0.026				-9	0.640426
		-8.25	12	1.437e-14	-0.022			-8.5	0.341574		-8.25	12	1.375e-14	-0.02			-8.5	0.328947		-8.25	12	7.239e-15	-0.016			-8.5	1.21236		-8.25	12	2.429e-15	-0.023			-8.5	1.02317		-8.25	12	2.378e-15	-0.021				-8.5	0.97499
		-7.75	13	3.801e-14	-0.014			-8	0.903494		-7.75	13	3.719e-14	-0.012			-8	0.889713		-7.75	13	1.435e-14	-0.012			-8	2.40328		-7.75	13	4.625e-15	-0.017			-8	1.94819		-7.75	13	4.609e-15	-0.015				-8	1.88971
		-7.25	14	1.118e-13	-0.008			-7.5	2.65748		-7.25	14	1.083e-13	-0.007			-7.5	2.59091		-7.25	14	3.65e-14	-0.007			-7.5	6.11288		-7.25	14	1.216e-14	-0.011			-7.5	5.12216		-7.25	14	1.264e-14	-0.009				-7.5	5.18245
		-6.75	15	2.781e-13	-0.005			-7	6.61041		-6.75	15	2.705e-13	-0.005			-7	6.47129		-6.75	15	8.93e-14	-0.005			-7	14.9556		-6.75	15	3.371e-14	-0.006			-7	14.1997		-6.75	15	3.45e-14	-0.006				-7	14.1451
								-0.25	0								-0.25	0								-0.25	0								-0.25	0									-0.25	0
		-6.25	16	5.641e-13	-0.004			-6.5	13.4086		-6.25	16	5.523e-13	-0.003			-6.5	13.2129		-6.25	16	1.856e-13	-0.003			-6.5	31.0836		-6.25	16	7.502e-14	-0.004			-6.5	31.6007		-6.25	16	7.648e-14	-0.004				-6.5	31.3571
		-5.75	17	9.32e-13	-0.003			-6	22.1536		-5.75	17	9.137e-13	-0.002			-6	21.8589		-5.75	17	3.113e-13	-0.002			-6	52.1353		-5.75	17	1.3e-13	-0.003			-6	54.7599		-5.75	17	1.33e-13	-0.003				-6	54.5305
		-5.25	18	1.297e-12	-0.002			-5.5	30.8296		-5.25	18	1.267e-12	-0.002			-5.5	30.311		-5.25	18	4.237e-13	-0.002			-5.5	70.9596		-5.25	18	1.791e-13	-0.003			-5.5	75.4423		-5.25	18	1.85e-13	-0.002				-5.5	75.8508
		-4.75	19	1.643e-12	-0.002			-5	39.054		-4.75	19	1.604e-12	-0.002			-5	38.3732		-4.75	19	4.965e-13	-0.002			-5	83.1519		-4.75	19	2.102e-13	-0.003			-5	88.5425		-4.75	19	2.193e-13	-0.002				-5	89.9139
		-4.25	20	1.972e-12	-0.002			-4.5	46.8743		-4.25	20	1.922e-12	-0.002			-4.5	45.9809		-4.25	20	5.364e-13	-0.002			-4.5	89.8342		-4.25	20	2.263e-13	-0.002			-4.5	95.3243		-4.25	20	2.372e-13	-0.002				-4.5	97.253
								-0.25	0								-0.25	0								-0.25	0								-0.25	0									-0.25	0
		-3.75	21	2.296e-12	-0.002			-4	54.5757		-3.75	21	2.247e-12	-0.002			-4	53.756		-3.75	21	5.606e-13	-0.002			-4	93.8871		-3.75	21	2.325e-13	-0.002			-4	97.936		-3.75	21	2.45e-13	-0.002				-4	100.451
		-3.25	22	2.628e-12	-0.002			-3.5	62.4673		-3.25	22	2.591e-12	-0.001			-3.5	61.9856		-3.25	22	5.741e-13	-0.002			-3.5	96.148		-3.25	22	2.358e-13	-0.002			-3.5	99.326		-3.25	22	2.483e-13	-0.002				-3.5	101.804
		-2.75	23	2.961e-12	-0.002			-3	70.3827		-2.75	23	2.93e-12	-0.001			-3	70.0957		-2.75	23	5.845e-13	-0.002			-3	97.8898		-2.75	23	2.383e-13	-0.002			-3	100.379		-2.75	23	2.488e-13	-0.002				-3	102.009
		-2.25	24	3.299e-12	-0.001			-2.5	78.4169		-2.25	24	3.264e-12	-0.001			-2.5	78.0861		-2.25	24	5.879e-13	-0.002			-2.5	98.4592		-2.25	24	2.389e-13	-0.002			-2.5	100.632		-2.25	24	2.489e-13	-0.002				-2.5	102.05
		-1.75	25	3.594e-12	-0.001			-2	85.429		-1.75	25	3.553e-12	-0.001			-2	85		-1.75	25	5.922e-13	-0.002			-2	99.1794		-1.75	25	2.39e-13	-0.002			-2	100.674		-1.75	25	2.477e-13	-0.002				-2	101.558
								-0.25	0								-0.25	0								-0.25	0								-0.25	0									-0.25	0
		-1.25	26	3.85e-12	-0.001			-1.5	91.5141		-1.25	26	3.821e-12	-0.001			-1.5	91.4115		-1.25	26	5.95e-13	-0.002			-1.5	99.6483		-1.25	26	2.385e-13	-0.002			-1.5	100.463		-1.25	26	2.459e-13	-0.002				-1.5	100.82
		-0.75	27	4.053e-12	-0.001			-1	96.3394		-0.75	27	4.018e-12	-0.001			-1	96.1244		-0.75	27	5.966e-13	-0.002			-1	99.9163		-0.75	27	2.378e-13	-0.002			-1	100.168		-0.75	27	2.455e-13	-0.002				-1	100.656
		-0.25	28	4.172e-12	-0.001			-0.5	99.1681		-0.25	28	4.147e-12	-0.001			-0.5	99.2105		-0.25	28	5.973e-13	-0.002			-0.5	100.033		-0.25	28	2.369e-13	-0.002			-0.5	99.7894		-0.25	28	2.429e-13	-0.002				-0.5	99.59
		0.25	29	4.207e-12	-0.001			0	100		0.25	29	4.18e-12	-0.001			0	100		0.25	29	5.971e-13	-0.002			0	100		0.25	29	2.374e-13	-0.002			0	100		0.25	29	2.439e-13	-0.002				0	100
		0.75	30	4.153e-12	-0.001			0.5	98.7164		0.75	30	4.125e-12	-0.001			0.5	98.6842		0.75	30	5.977e-13	-0.002			0.5	100.1		0.75	30	2.373e-13	-0.002			0.5	99.9579		0.75	30	2.435e-13	-0.002				0.5	99.836
								-0.25	0								-0.25	0								-0.25	0								-0.25	0									-0.25	0
		1.25	31	4.013e-12	-0.001			1	95.3886		1.25	31	3.981e-12	-0.001			1	95.2392		1.25	31	5.934e-13	-0.002			1	99.3803		1.25	31	2.375e-13	-0.002			1	100.042		1.25	31	2.449e-13	-0.002				1	100.41
		1.75	32	3.803e-12	-0.001			1.5	90.397		1.75	32	3.786e-12	-0.001			1.5	90.5742		1.75	32	5.943e-13	-0.002			1.5	99.5311		1.75	32	2.385e-13	-0.002			1.5	100.463		1.75	32	2.451e-13	-0.002				1.5	100.492
		2.25	33	3.562e-12	-0.001			2	84.6684		2.25	33	3.517e-12	-0.001			2	84.1388		2.25	33	5.929e-13	-0.002			2	99.2966		2.25	33	2.379e-13	-0.002			2	100.211		2.25	33	2.47e-13	-0.002				2	101.271
		2.75	34	3.262e-12	-0.001			2.5	77.5374		2.75	34	3.232e-12	-0.001			2.5	77.3206		2.75	34	5.884e-13	-0.002			2.5	98.543		2.75	34	2.395e-13	-0.002			2.5	100.885		2.75	34	2.484e-13	-0.002				2.5	101.845
		3.25	35	2.969e-12	-0.002			3	70.5729		3.25	35	2.927e-12	-0.001			3	70.0239		3.25	35	5.858e-13	-0.002			3	98.1075		3.25	35	2.388e-13	-0.002			3	100.59		3.25	35	2.494e-13	-0.002				3	102.255
								-0.25	0								-0.25	0								-0.25	0								-0.25	0									-0.25	0
		3.75	36	2.66e-12	-0.002			3.5	63.228		3.75	36	2.617e-12	-0.001			3.5	62.6077		3.75	36	5.774e-13	-0.002			3.5	96.7007		3.75	36	2.366e-13	-0.002			3.5	99.663		3.75	36	2.495e-13	-0.002				3.5	102.296
		4.25	37	2.345e-12	-0.002			4	55.7404		4.25	37	2.308e-12	-0.002			4	55.2153		4.25	37	5.636e-13	-0.002			4	94.3895		4.25	37	2.345e-13	-0.002			4	98.7784		4.25	37	2.472e-13	-0.002				4	101.353
		4.75	38	2.024e-12	-0.002			4.5	48.1103		4.75	38	1.988e-12	-0.002			4.5	47.5598		4.75	38	5.425e-13	-0.002			4.5	90.8558		4.75	38	2.274e-13	-0.002			4.5	95.7877		4.75	38	2.384e-13	-0.002				4.5	97.745
		5.25	39	1.689e-12	-0.002			5	40.1474		5.25	39	1.657e-12	-0.002			5	39.6411		5.25	39	4.99e-13	-0.002			5	83.5706		5.25	39	2.119e-13	-0.003			5	89.2586		5.25	39	2.222e-13	-0.002				5	91.1029
		5.75	40	1.339e-12	-0.002			5.5	31.8279		5.75	40	1.308e-12	-0.002			5.5	31.2919		5.75	40	4.245e-13	-0.002			5.5	71.0936		5.75	40	1.8e-13	-0.003			5.5	75.8214		5.75	40	1.858e-13	-0.002				5.5	76.1788
								-0.25	0								-0.25	0								-0.25	0								-0.25	0									-0.25	0
		6.25	41	9.526e-13	-0.003			6	22.6432		6.25	41	9.376e-13	-0.002			6	22.4306		6.25	41	3.101e-13	-0.002			6	51.9343		6.25	41	1.299e-13	-0.003			6	54.7178		6.25	41	1.339e-13	-0.003				6	54.8995
		6.75	42	5.736e-13	-0.004			6.5	13.6344		6.75	42	5.67e-13	-0.003			6.5	13.5646		6.75	42	1.859e-13	-0.003			6.5	31.1338		6.75	42	7.433e-14	-0.004			6.5	31.31		6.75	42	7.712e-14	-0.004				6.5	31.6195
		7.25	43	2.82e-13	-0.005			7	6.70311		7.25	43	2.766e-13	-0.005			7	6.61722		7.25	43	8.881e-14	-0.005			7	14.8736		7.25	43	3.349e-14	-0.006			7	14.107		7.25	43	3.434e-14	-0.006				7	14.0795
		7.75	44	1.126e-13	-0.008			7.5	2.67649		7.75	44	1.102e-13	-0.007			7.5	2.63636		7.75	44	3.67e-14	-0.007			7.5	6.14637		7.75	44	1.217e-14	-0.011			7.5	5.12637		7.75	44	1.27e-14	-0.009				7.5	5.20705
		8.25	45	3.928e-14	-0.014			8	0.933682		8.25	45	3.771e-14	-0.012			8	0.902153		8.25	45	1.409e-14	-0.012			8	2.35974		8.25	45	4.664e-15	-0.017			8	1.96462		8.25	45	4.611e-15	-0.015				8	1.89053
								-0.25	0								-0.25	0								-0.25	0								-0.25	0									-0.25	0
		8.75	46	1.491e-14	-0.022			8.5	0.354409		8.75	46	1.394e-14	-0.02			8.5	0.333493		8.75	46	7.382e-15	-0.016			8.5	1.23631		8.75	46	2.482e-15	-0.023			8.5	1.04549		8.75	46	2.336e-15	-0.021				8.5	0.95777
		9.25	47	8.436e-15	-0.029			9	0.200523		9.25	47	8.184e-15	-0.025			9	0.195789		9.25	47	4.76e-15	-0.02			9	0.797186		9.25	47	1.687e-15	-0.028			9	0.710615		9.25	47	1.557e-15	-0.025				9	0.638376
		9.75	48	5.435e-15	-0.035			9.5	0.129189		9.75	48	5.523e-15	-0.031			9.5	0.132129		9.75	48	3.22e-15	-0.024			9.5	0.539273		9.75	48	1.114e-15	-0.034			9.5	0.46925		9.75	48	9.893e-16	-0.032				9.5	0.405617
		10.25	49	4.17e-15	-0.04			10	0.0991205		10.25	49	3.886e-15	-0.037			10	0.0929665		10.25	49	2.292e-15	-0.028			10	0.383855		10.25	49	8.023e-16	-0.04			10	0.337953		10.25	49	6.284e-16	-0.038				10	0.257647
		10.75	50	3.01e-15	-0.048			10.5	0.0715474		10.75	50	2.809e-15	-0.043			10.5	0.067201		10.75	50	1.679e-15	-0.033			10.5	0.281192		10.75	50	5.321e-16	-0.047			10.5	0.224136		10.75	50	4.303e-16	-0.046				10.5	0.176425
								-0.25	0								-0.25	0								-0.25	0								-0.25	0									-0.25	0
		11.25	51	2.139e-15	-0.055			11	0.0508438		11.25	51	1.815e-15	-0.051			11	0.0434211		11.25	51	1.217e-15	-0.038			11	0.203818		11.25	51	3.802e-16	-0.057			11	0.160152		11.25	51	3.151e-16	-0.054				11	0.129192
		11.75	52	1.486e-15	-0.065			11.5	0.0353221		11.75	52	1.459e-15	-0.057			11.5	0.0349043		11.75	52	9.07e-16	-0.044			11.5	0.151901		11.75	52	2.847e-16	-0.065			11.5	0.119924		11.75	52	2.076e-16	-0.067				11.5	0.0851169
		12.25	53	1.053e-15	-0.077			12	0.0250297		12.25	53	1.223e-15	-0.063			12	0.0292584		12.25	53	5.916e-16	-0.052			12	0.0990789		12.25	53	2.115e-16	-0.076			12	0.0890901		12.25	53	1.513e-16	-0.072				12	0.0620336
		12.75	54	8.008e-16	-0.086			12.5	0.0190349		12.75	54	8.15e-16	-0.075			12.5	0.0194976		12.75	54	4.408e-16	-0.06			12.5	0.0738235		12.75	54	1.797e-16	-0.077			12.5	0.075695		12.75	54	1.262e-16	-0.085				12.5	0.0517425
		13.25	55	4.909e-16	-0.097			13	0.0116686		13.25	55	5.782e-16	-0.091			13	0.0138325		13.25	55	3.356e-16	-0.065			13	0.056205		13.25	55	1.109e-16	-0.091			13	0.0467144		13.25	55	8.961e-17	-0.099				13	0.0367405
								-0.25	0								-0.25	0								-0.25	0								-0.25	0									-0.25	0
		13.75	56	3.675e-16	-0.125			13.5	0.00873544		13.75	56	4.911e-16	-0.096			13.5	0.0117488		13.75	56	2.561e-16	-0.078			13.5	0.0428906		13.75	56	1.064e-16	-0.098			13.5	0.0448189		13.75	56	6.89e-17	-0.106				13.5	0.0282493
		14.25	57	3.802e-16	-0.12			14	0.00903732		14.25	57	3.711e-16	-0.111			14	0.00887799		14.25	57	1.888e-16	-0.09			14	0.0316195		14.25	57	7.616e-17	-0.107			14	0.0320809		14.25	57	4.939e-17	-0.12				14	0.0202501
